# Supplementary material for: The Database for Aggregate Analysis of ClinicalTrials.gov (AACT) and Subsequent Regrouping by Clinical Specialty
Source: PLOS journal article supplement (doi:10.1371/journal.pone.0033677), 2012-03-16
Supplement: S1 (10.1371/journal.pone.0033677.s001) [file journal.pone.0033677.s001]

## Data Dictionary (V2.0)

Comments on 'CTTI\_Notes' column: CTTI notes are provided for those variables that are either derived from ClinicalTrials.gov data elements (e.g. 'Design\_Name' and 'Design\_Value' are derived from 'Study\_Design'), or are not available in ClinicalTrials.gov Protocol Data Element Definitions (e.g. , 'Agency\_Class', 'First\_Received\_Results\_Date', and 'MeSH\_Term' etc.), or are defined primarily for CTTI's database purposes (e.g. system generated sequential IDs).

### Data Element Requirements

'NLM Required' column: 'Yes' if ClinicalTrials.gov requires a user to enter a value.

'FDAAA Required' column: 'Yes' if user is required to enter a value in order to comply with US Public Law 110-85, Section 801. 'Maybe' if User may be required to enter a value in order to comply with US Public Law 110-85, Section 801.

Within 'NLM Definitions' Column:

\* --- Required by ClinicalTrials.gov

FDAAA --- Required to comply with US Public Law 110-85, Section 801

(FDAAA) --- May be required to comply with US Public Law 110-85, Section 801

| Variable Name | Variable Label                     | Value List | Entity Name | NLM Required | FDAAA Required | NLM Definitions | CTTI Definitions                                                                                                                                                                                                                                                                                                                                            | Variable Source |
|---------------|------------------------------------|------------|-------------|--------------|----------------|-----------------|-------------------------------------------------------------------------------------------------------------------------------------------------------------------------------------------------------------------------------------------------------------------------------------------------------------------------------------------------------------|-----------------|
| address_id    | Primary Key for ADDRESSES          |            | ADDRESSES   | N/A          | N/A            |                 | Numeric sequential ID generated by system. ADDRESS_ID_SEQ. A record was generated in ADDRESSES table for every NCT_ID (unique study ID), even when there is no data under address (<city>, <state>, <zip>, <country>) for that NCT_ID from ClinicalTrials.gov dataset. In this case the record has NULL values for city, state, zip, and country variables. | CTTI            |
| city          | City                               |            | ADDRESSES   | Yes          | Maybe          | City            |                                                                                                                                                                                                                                                                                                                                                             | NLM             |
| country       | Country                            |            | ADDRESSES   | Yes          | Maybe          | Country         |                                                                                                                                                                                                                                                                                                                                                             | NLM             |
| facility_id   | Foreign Key for FACILITIES         |            | ADDRESSES   | N/A          | N/A            |                 | Numeric sequential ID generated by system. FACILITY_ID_SEQ                                                                                                                                                                                                                                                                                                  | CTTI            |
| nct_id        | ClinicalTrials.gov registry number |            | ADDRESSES   | No           | No             | N/A             | The NCT number is a unique number assigned by clinicaltrials.gov to each clinical trial.                                                                                                                                                                                                                                                                    | NLM             |
| state         | State                              |            | ADDRESSES   | Yes          | Maybe          | State           |                                                                                                                                                                                                                                                                                                                                                             | NLM             |
| zip           | Zip                                |            | ADDRESSES   | No           | No             | Zip             |                                                                                                                                                                                                                                                                                                                                                             | NLM             |
| arm_group_id  | Primary Key for ARM_GROUPS         |            | ARM_GROUPS  | N/A          | N/A            |                 | Numeric sequential ID generated by system. ARM_GROUP_ID_SEQ                                                                                                                                                                                                                                                                                                 | CTTI            |

| Variable Name   | Variable Label                     | Value List                                                                                                                                                               | Entity Name | NLM Required | FDAAA Required | NLM Definitions                                                                                                                                                                                                                                                                                                                                                                                                                                                                                                                  | CTTI Definitions                                                                                   | Variable Source |
|-----------------|------------------------------------|--------------------------------------------------------------------------------------------------------------------------------------------------------------------------|-------------|--------------|----------------|----------------------------------------------------------------------------------------------------------------------------------------------------------------------------------------------------------------------------------------------------------------------------------------------------------------------------------------------------------------------------------------------------------------------------------------------------------------------------------------------------------------------------------|----------------------------------------------------------------------------------------------------|-----------------|
| arm_group_label | Arm or Group Label                 |                                                                                                                                                                          | ARM_GROUPS  | Yes          | Maybe          | <p>Arm Label - the short name used to identify the arm. (Limit: 62 characters).<br/>* (FDAAA)</p> <p>Group/Cohort Label - the short name used to identify the group. (Limit: 62 characters)<br/>*</p>                                                                                                                                                                                                                                                                                                                            |                                                                                                    | NLM             |
| arm_group_type  | Arm Type                           | Experimental<br>Sham Comparator<br>Other<br>Control<br>Exposure Comparison<br>Treatment Comparison<br>Case<br>No intervention<br>Placebo Comparator<br>Active Comparator | ARM_GROUPS  | Yes          | Maybe          | <p>Arm Type (Experimental, Active Comparator, Placebo Comparator, Sham Comparator, No intervention, Other)</p>                                                                                                                                                                                                                                                                                                                                                                                                                   | <p>Although the attribute's name is arm_group_type, the data is available only for "Arm Type".</p> | NLM             |
| description     | Arm or Group Description           |                                                                                                                                                                          | ARM_GROUPS  | No           | Maybe          | <p>Arm Description (FDAAA): Brief description of the arm. This element may not be necessary if the associated intervention descriptions contain sufficient information to describe the arm. (Limit: 999 characters)</p> <p>Group/Cohort Description: Explanation of the nature of the study group (e.g., those with a condition and those without a condition; those with an exposure and those without an exposure). Note that the overall study population should be described under Eligibility. (Limit: 1000 characters)</p> |                                                                                                    | NLM             |
| nct_id          | ClinicalTrials.gov registry number |                                                                                                                                                                          | ARM_GROUPS  | No           | No             | N/A                                                                                                                                                                                                                                                                                                                                                                                                                                                                                                                              | <p>The NCT number is a unique number assigned by clinicaltrials.gov to each clinical trial.</p>    | NLM             |

| Variable Name     | Variable Label                     | Value List                                               | Entity Name    | NLM Required | FDAAA Required | NLM Definitions                                                                                                                                                                                                                                                                                                                                                                                   | CTTI Definitions                                                                         | Variable Source |
|-------------------|------------------------------------|----------------------------------------------------------|----------------|--------------|----------------|---------------------------------------------------------------------------------------------------------------------------------------------------------------------------------------------------------------------------------------------------------------------------------------------------------------------------------------------------------------------------------------------------|------------------------------------------------------------------------------------------|-----------------|
| authority         | Oversight Authorities              |                                                          | AUTHORITIES    | Yes          | No             | The name of each national or international health organization with authority over the protocol. Use the following format for each authority: country: organization name.<br><br>Examples:<br>United States: Institutional Review Board<br>United States: Food and Drug Administration<br>Germany: Federal Institute for Drugs and Medical Devices<br>Australia: Therapeutic Goods Administration |                                                                                          | NLM             |
| authority_id      | Primary Key for AUTHORITIES        |                                                          | AUTHORITIES    | N/A          | N/A            |                                                                                                                                                                                                                                                                                                                                                                                                   | Numeric sequential ID generated by system. AUTHORITY_ID_SEQ                              | CTTI            |
| nct_id            | ClinicalTrials.gov registry number |                                                          | AUTHORITIES    | No           | No             | N/A                                                                                                                                                                                                                                                                                                                                                                                               | The NCT number is a unique number assigned by clinicaltrials.gov to each clinical trial. | NLM             |
| acronym           | Acronym                            |                                                          | CLINICAL_STUDY | No           | No             | Acronym or initials used to identify this study, if applicable. Enter only the acronym. If supplied, the acronym is automatically displayed in parentheses following the brief title. (Limit: 14 characters)                                                                                                                                                                                      |                                                                                          | NLM             |
| biospec_descr     | Biospecimen Description            |                                                          | CLINICAL_STUDY | No           | No             | Specify all types of biospecimens to be retained (e.g., whole blood, serum, white cells, urine, tissue). (Limit: 1000 characters)                                                                                                                                                                                                                                                                 |                                                                                          | NLM             |
| biospec_retention | Biospecimen Retention              | None Retained<br>Samples With DNA<br>Samples Without DNA | CLINICAL_STUDY | No           | No             | Retention status                                                                                                                                                                                                                                                                                                                                                                                  |                                                                                          | NLM             |
| brief_summary     | Brief Summary                      |                                                          | CLINICAL_STUDY | Yes          | Yes            | Short description of the protocol intended for the lay public. Include a brief statement of the study hypothesis. (Limit: 5000 characters)                                                                                                                                                                                                                                                        |                                                                                          | NLM             |
| brief_title       | Brief Title                        |                                                          | CLINICAL_STUDY | Yes          | Yes            | Protocol title intended for the lay public. (Limit: 300 characters)                                                                                                                                                                                                                                                                                                                               |                                                                                          | NLM             |
| completion_date   | Study Completion Date              |                                                          | CLINICAL_STUDY | No           | No             | Final date on which data was (or is expected to be) collected. Use the Type menu (Anticipated/Actual).                                                                                                                                                                                                                                                                                            |                                                                                          | NLM             |

| Variable Name              | Variable Label              | Value List            | Entity Name    | NLM Required | FDAAA Required | NLM Definitions                                                                                                                                                                                                                                                                                          | CTTI Definitions                                                                                                           | Variable Source |
|----------------------------|-----------------------------|-----------------------|----------------|--------------|----------------|----------------------------------------------------------------------------------------------------------------------------------------------------------------------------------------------------------------------------------------------------------------------------------------------------------|----------------------------------------------------------------------------------------------------------------------------|-----------------|
| completion_date_type       | Study Completion Date Type  | Actual<br>Anticipated | CLINICAL_STUDY | No           | No             | A "Type" menu is also included, with options Anticipated and Actual. For active studies, set Type to Anticipated and specify the expected completion date, updating the date as needed over the course of the study. Upon study completion, change Type to Actual and update the date if necessary.      |                                                                                                                            | NLM             |
| criteria                   | Eligibility Criteria        |                       | CLINICAL_STUDY | Yes          | Yes            | Summary criteria for participant selection. The preferred format includes lists of inclusion and exclusion criteria as shown below. (Limit: 15,000 characters)                                                                                                                                           |                                                                                                                            | NLM             |
| detailed_description       | Detailed Description        |                       | CLINICAL_STUDY | No           | No             | Extended description of the protocol, including more technical information (as compared to the Brief Summary) if desired. Do not include the entire protocol; do not duplicate information recorded in other data elements, such as eligibility criteria or outcome measures. (Limit: 32,000 characters) |                                                                                                                            | NLM             |
| download_date              | Download                    |                       | CLINICAL_STUDY | No           | No             | N/A                                                                                                                                                                                                                                                                                                      | Date of download from NLM                                                                                                  | NLM             |
| download_date_date         | Download Date (Parsed)      |                       | CLINICAL_STUDY | No           | No             |                                                                                                                                                                                                                                                                                                          | Date of download from NLM, free text date converted to DATE type                                                           | CTTI            |
| enrollment                 | Enrollment                  |                       | CLINICAL_STUDY | Yes          | Yes            | Target or Actual Number of Subjects. Number of subjects in the trial.                                                                                                                                                                                                                                    |                                                                                                                            | NLM             |
| enrollment_type            | Enrollment Type             | Actual<br>Anticipated | CLINICAL_STUDY | Yes          | Yes            | A "Type" menu is also included, with options Anticipated and Actual. For active studies, set Type to Anticipated and specify the expected enrollment, updating the number as needed over the course of the study. Upon study completion, change Type to Actual and update the enrollment if necessary.   |                                                                                                                            | NLM             |
| firstreceived_date         | First Received Date         |                       | CLINICAL_STUDY | No           | No             | N/A                                                                                                                                                                                                                                                                                                      | Date of data first available to public (approximate)                                                                       | NLM             |
| firstreceived_results_date | First Received Results Date |                       | CLINICAL_STUDY | No           | No             | N/A                                                                                                                                                                                                                                                                                                      | This tag is available only of those studies that have results and indicates the date when the results were first received. | NLM             |

| Variable Name       | Variable Label              | Value List             | Entity Name    | NLM Required | FDAAA Required | NLM Definitions                                                                                                                                                                                                                                                                                                                                                                                                                                                                                                            | CTTI Definitions | Variable Source |
|---------------------|-----------------------------|------------------------|----------------|--------------|----------------|----------------------------------------------------------------------------------------------------------------------------------------------------------------------------------------------------------------------------------------------------------------------------------------------------------------------------------------------------------------------------------------------------------------------------------------------------------------------------------------------------------------------------|------------------|-----------------|
| gender              | Gender                      | Both<br>Female<br>Male | CLINICAL_STUDY | Yes          | Yes            | Physical gender of individuals who may participate in the protocol.                                                                                                                                                                                                                                                                                                                                                                                                                                                        |                  | NLM             |
| has_dmc             | Data Monitoring Committee?  | yes<br>no              | CLINICAL_STUDY | No           | No             | Indicate whether a data monitoring committee has been appointed for this study. The data monitoring committee (board) is a group of independent scientists who are appointed to monitor the safety and scientific integrity of a human research intervention, and to make recommendations to the sponsor regarding the stopping of the trial for efficacy, for harms or for futility. The composition of the committee is dependent upon the scientific skills and knowledge required for monitoring the particular study. |                  | NLM             |
| has_expanded_access | Has Expanded Access?        | yes<br>no              | CLINICAL_STUDY | No           | Yes            | Indicate whether any non-protocol access is to be provided for the investigational drug or device. If so, an Expanded Access record should also be created for this IND/IDE.                                                                                                                                                                                                                                                                                                                                               |                  | NLM             |
| healthy_volunteers  | Accepts Healthy Volunteers? |                        | CLINICAL_STUDY | No           | Yes            | Indicate if persons who have not had the condition(s) being studied or otherwise related conditions or symptoms, as specified in the eligibility requirements, may participate in the study.                                                                                                                                                                                                                                                                                                                               |                  | NLM             |
| is_fda_regulated    | FDA Regulated Intervention? | yes<br>no              | CLINICAL_STUDY | No           | Maybe          | Indicate whether this trial includes an intervention subject to US Food and Drug Administration regulation under section 351 of the Public Health Service Act or any of the following sections of the Federal Food, Drug and Cosmetic Act: 505, 510(k), 515, 520(m), and 522.                                                                                                                                                                                                                                              |                  | NLM             |

| Variable Name        | Variable Label                     | Value List | Entity Name    | NLM Required | FDAAA Required | NLM Definitions                                                                                                                                                                                                                                                                                                                                                                                                                                                                                                                               | CTTI Definitions                                                                                              | Variable Source |
|----------------------|------------------------------------|------------|----------------|--------------|----------------|-----------------------------------------------------------------------------------------------------------------------------------------------------------------------------------------------------------------------------------------------------------------------------------------------------------------------------------------------------------------------------------------------------------------------------------------------------------------------------------------------------------------------------------------------|---------------------------------------------------------------------------------------------------------------|-----------------|
| is_section_801       | Is section 801?                    | yes<br>no  | CLINICAL_STUDY | No           | Maybe          | If this trial includes an FDA regulated intervention, indicate whether this is an "applicable clinical trial" as defined in US Public Law 110-85, Title VIII, Section 801. Briefly, applicable drug trials include controlled clinical investigations, other than Phase I investigations, of a drug or biologic subject to US FDA regulation. Applicable device clinical trials are controlled trials with health outcomes of devices subject to FDA regulation, other than small feasibility studies, and pediatric postmarket surveillance. |                                                                                                               | NLM             |
| lastchanged_date     | Last Changed Date                  |            | CLINICAL_STUDY | No           | No             | N/A                                                                                                                                                                                                                                                                                                                                                                                                                                                                                                                                           | Date of last entry change.                                                                                    | NLM             |
| maximum_age          | Maximum Age                        |            | CLINICAL_STUDY | Yes          | Yes            | Maximum age of participants. Provide a number and a unit of time (years, months, weeks, days, hours or minutes). Select "N/A (No limit)" if no maximum age is indicated.                                                                                                                                                                                                                                                                                                                                                                      |                                                                                                               | NLM             |
| minimum_age          | Minimum Age                        |            | CLINICAL_STUDY | Yes          | Yes            | Minimum age of participants. Provide a number and select a unit of time (years, months, weeks, days, hours or minutes). Select "N/A (No limit)" if no minimum age is indicated.                                                                                                                                                                                                                                                                                                                                                               |                                                                                                               | NLM             |
| nct_alias            | Alternate NCT_ID                   |            | CLINICAL_STUDY | No           | No             | N/A                                                                                                                                                                                                                                                                                                                                                                                                                                                                                                                                           | The NCT_alias contains alternate NCT_ID numbers. Studies were formerly associated with these IDs at one time. | NLM             |
| nct_id               | ClinicalTrials.gov registry number |            | CLINICAL_STUDY | No           | No             | N/A                                                                                                                                                                                                                                                                                                                                                                                                                                                                                                                                           | The NCT number is a unique number assigned by clinicaltrials.gov to each clinical trial.                      | NLM             |
| number_of_arms       | Number of Arms                     |            | CLINICAL_STUDY | No           | Maybe          | Number of intervention groups (enter 1 for single-arm study).                                                                                                                                                                                                                                                                                                                                                                                                                                                                                 |                                                                                                               | NLM             |
| number_of_group<br>s | Number of Groups                   |            | CLINICAL_STUDY | Yes          | No             | Number of study groups/cohorts. Enter 1 for a single-group study. Many observational studies have one group/cohort; case control studies typically have two.                                                                                                                                                                                                                                                                                                                                                                                  |                                                                                                               | NLM             |

| Variable Name  | Variable Label                    | Value List                                                                                                                                                                                                                            | Entity Name    | NLM Required | FDAAA Required | NLM Definitions                                                                                                                                                                                                                                     | CTTI Definitions | Variable Source |
|----------------|-----------------------------------|---------------------------------------------------------------------------------------------------------------------------------------------------------------------------------------------------------------------------------------|----------------|--------------|----------------|-----------------------------------------------------------------------------------------------------------------------------------------------------------------------------------------------------------------------------------------------------|------------------|-----------------|
| official_title | Official Title                    |                                                                                                                                                                                                                                       | CLINICAL_STUDY | No           | No             | Official name of the protocol provided by the study principal investigator or sponsor. (Limit: 600 characters)                                                                                                                                      |                  | NLM             |
| org_study_id   | Organization's Unique Protocol id |                                                                                                                                                                                                                                       | CLINICAL_STUDY | Yes          | Yes            | Unique identification assigned to the protocol by the sponsoring organization, usually an accession number or a variation of a grant number. Multiple studies conducted under the same grant must each have a unique number. (Limit: 30 characters) |                  | NLM             |
| overall_status | Overall Recruitment Status        | Not yet recruiting<br>Active, not recruiting<br>Suspended<br>Withdrawn<br>No Longer Available<br>Approved for marketing<br>Temporarily not available<br>Available<br>Terminated<br>Completed<br>Enrolling by invitation<br>Recruiting | CLINICAL_STUDY | Yes          | Yes            | Overall accrual activity for the protocol.                                                                                                                                                                                                          |                  | NLM             |
| phase          | Study Phase                       | N/A<br>Phase 4<br>Phase 3<br>Phase 2/Phase 3<br>Phase 2<br>Phase 1/Phase 2<br>Phase 1<br>Phase 0                                                                                                                                      | CLINICAL_STUDY | Yes          | Yes            | Phase of investigation, as defined by the US FDA for trials involving investigational new drugs                                                                                                                                                     |                  | NLM             |

| Variable Name                | Variable Label               | Value List                                   | Entity Name    | NLM Required | FDAAA Required | NLM Definitions                                                                                                                                                                                                                                                                                                                                                                                                                                                                                                                                                                                                                                                | CTTI Definitions                                                                                                   | Variable Source |
|------------------------------|------------------------------|----------------------------------------------|----------------|--------------|----------------|----------------------------------------------------------------------------------------------------------------------------------------------------------------------------------------------------------------------------------------------------------------------------------------------------------------------------------------------------------------------------------------------------------------------------------------------------------------------------------------------------------------------------------------------------------------------------------------------------------------------------------------------------------------|--------------------------------------------------------------------------------------------------------------------|-----------------|
| primary_completion_date      | Primary Completion Date      |                                              | CLINICAL_STUDY | No           | Yes            | As specified in US Public Law 110-85, Title VIII, Section 801, with respect to an applicable clinical trial, the date that the final subject was examined or received an intervention for the purposes of final collection of data for the primary outcome, whether the clinical trial concluded according to the prespecified protocol or was terminated. A "Type" menu is also included, with options Anticipated and Actual. For active studies, set Type to Anticipated and specify the expected completion date, updating the date as needed over the course of the study. Upon study completion, change Type to Actual and update the date if necessary. |                                                                                                                    | NLM             |
| primary_completion_date_type | Primary Completion Date Type | Actual<br>Anticipated                        | CLINICAL_STUDY | No           | Yes            | A "Type" menu is also included, with options Anticipated and Actual. For active studies, set Type to Anticipated and specify the expected completion date, updating the date as needed over the course of the study. Upon study completion, change Type to Actual and update the date if necessary.                                                                                                                                                                                                                                                                                                                                                            |                                                                                                                    | NLM             |
| sampling_method              | Sampling Method              | Probability Sample<br>Non-Probability Sample | CLINICAL_STUDY | Yes          | No             | For observational studies only, select one and explain in Detailed Description.                                                                                                                                                                                                                                                                                                                                                                                                                                                                                                                                                                                |                                                                                                                    | NLM             |
| source                       | Source                       |                                              | CLINICAL_STUDY | No           | No             | N/A                                                                                                                                                                                                                                                                                                                                                                                                                                                                                                                                                                                                                                                            | Similar to Lead sponsor, but may indicate who the data was submitted on behalf of, or a subsidiary of the sponsor. | NLM             |
| start_date                   | Study Start Date             |                                              | CLINICAL_STUDY | No           | Yes            | Date that enrollment to the protocol begins.                                                                                                                                                                                                                                                                                                                                                                                                                                                                                                                                                                                                                   |                                                                                                                    | NLM             |



| Variable Name | Variable Label               | Value List | Entity Name    | NLM Required                                                                                                                                                                                                              | FDAAA Required                                                                                                                                                                                                                   | NLM Definitions                                                                                                                                                                                                        | CTTI Definitions | Variable Source |
|---------------|------------------------------|------------|----------------|---------------------------------------------------------------------------------------------------------------------------------------------------------------------------------------------------------------------------|----------------------------------------------------------------------------------------------------------------------------------------------------------------------------------------------------------------------------------|------------------------------------------------------------------------------------------------------------------------------------------------------------------------------------------------------------------------|------------------|-----------------|
| study_design  | Study Design                 |            | CLINICAL_STUDY | Yes (Interventional Study Design)<br><br>No (Primary Purpose)<br><br>No (Intervention Model)<br><br>No (Allocation)<br><br>No (Study Classification)<br><br>Yes (Observational Study Model)<br><br>Yes (Time Perspective) | Maybe (Interventional Study Design)<br><br>Yes (Primary Purpose)<br><br>Maybe (Intervention Model)<br><br>Maybe (Allocation)<br><br>No (Study Classification)<br><br>No (Observational Study Model)<br><br>No (Time Perspective) | Interventional or Observational study design                                                                                                                                                                           |                  | NLM             |
| study_pop     | Study Population Description |            | CLINICAL_STUDY | Yes                                                                                                                                                                                                                       | No                                                                                                                                                                                                                               | For observational studies only, a description of the population from which the groups or cohorts will be selected (e.g., primary care clinic, community sample, residents of a certain town). (Limit: 1000 characters) |                  | NLM             |

| Variable Name | Variable Label | Value List                                         | Entity Name    | NLM Required | FDAAA Required | NLM Definitions                                                                                                                                                                                                                                                                                                                                                                                                                                                                                                                                                                                                                                                                                                                                                                                                                                                                                                                                                                                                                                                                                                                                                                                                                  | CTTI Definitions | Variable Source |
|---------------|----------------|----------------------------------------------------|----------------|--------------|----------------|----------------------------------------------------------------------------------------------------------------------------------------------------------------------------------------------------------------------------------------------------------------------------------------------------------------------------------------------------------------------------------------------------------------------------------------------------------------------------------------------------------------------------------------------------------------------------------------------------------------------------------------------------------------------------------------------------------------------------------------------------------------------------------------------------------------------------------------------------------------------------------------------------------------------------------------------------------------------------------------------------------------------------------------------------------------------------------------------------------------------------------------------------------------------------------------------------------------------------------|------------------|-----------------|
| study_type    | Study Type     | Interventional<br>Expanded access<br>Observational | CLINICAL_STUDY | Yes          | Yes            | <p>nature of the investigation.</p> <p>* Interventional: studies in human beings in which individuals are assigned by an investigator based on a protocol to receive specific interventions. Subjects may receive diagnostic, therapeutic or other types of interventions. The assignment of the intervention may or may not be random. The individuals are then followed and biomedical and/or health outcomes are assessed.</p> <p>* Observational: studies in human beings in which biomedical and/or health outcomes are assessed in pre-defined groups of individuals. Subjects in the study may receive diagnostic, therapeutic, or other interventions, but the investigator does not assign specific interventions to the subjects of the study.</p> <p>* Expanded Access: records describing the procedure for obtaining an experimental drug or device for patients who are not adequately treated by existing therapy, who do not meet the eligibility criteria for enrollment, or who are otherwise unable to participate in a controlled clinical study. Expanded Access records are used to register all types of non-protocol access to experimental treatments, including protocol exception, single-patient</p> |                  | NLM             |

| Variable Name     | Variable Label                     | Value List | Entity Name      | NLM Required | FDAAA Required | NLM Definitions                                                                                                                                                                                                                                                                                                                                                                      | CTTI Definitions                                                                         | Variable Source |
|-------------------|------------------------------------|------------|------------------|--------------|----------------|--------------------------------------------------------------------------------------------------------------------------------------------------------------------------------------------------------------------------------------------------------------------------------------------------------------------------------------------------------------------------------------|------------------------------------------------------------------------------------------|-----------------|
| verification_date | Record Verification Date           |            | CLINICAL_STUDY   | Yes          | Yes            | Date the protocol information was last verified. Verification date is shown along with organization name on ClinicalTrials.gov to indicate to the public whether the information is being kept current, particularly recruiting status and contact information. Update verification date when reviewing the record for accuracy and completeness, even if no other changes are made. |                                                                                          | NLM             |
| why_stopped       | Why Study Stopped                  |            | CLINICAL_STUDY   | No           | No             | For suspended, terminated or withdrawn studies, provide a brief explanation of why the study has been halted or terminated. If desired, use brief summary or detailed description to provide additional information. (Limit: 160 characters)                                                                                                                                         |                                                                                          | NLM             |
| mesh_condition_id | Primary Key for CONDITION_BROWSE   |            | CONDITION_BROWSE | N/A          | N/A            |                                                                                                                                                                                                                                                                                                                                                                                      | Numeric sequential ID generated by system. MESH_CONDITION_ID_SEQ                         | CTTI            |
| mesh_term         | Condition MeSH terms               |            | CONDITION_BROWSE | No           | No             | N/A                                                                                                                                                                                                                                                                                                                                                                                  | Condition MeSH terms generated by NLM algorithm                                          | NLM             |
| nct_id            | ClinicalTrials.gov registry number |            | CONDITION_BROWSE | No           | No             | N/A                                                                                                                                                                                                                                                                                                                                                                                  | The NCT number is a unique number assigned by clinicaltrials.gov to each clinical trial. | NLM             |
| condition         | Condition                          |            | CONDITIONS       | Yes          | Yes            | Primary disease or condition being studied, or focus of the study. Diseases or conditions should use the National Library of Medicine's Medical Subject Headings (MeSH) controlled vocabulary when possible.                                                                                                                                                                         |                                                                                          | NLM             |
| condition_id      | Primary Key for CONDITIONS         |            | CONDITIONS       | N/A          | N/A            |                                                                                                                                                                                                                                                                                                                                                                                      | Numeric sequential ID generated by system. CONDITION_ID_SEQ                              | CTTI            |
| nct_id            | ClinicalTrials.gov registry number |            | CONDITIONS       | No           | No             | N/A                                                                                                                                                                                                                                                                                                                                                                                  | The NCT number is a unique number assigned by clinicaltrials.gov to each clinical trial. | NLM             |
| design_id         | Primary Key for DESIGNS            |            | DESIGNS          | N/A          | N/A            |                                                                                                                                                                                                                                                                                                                                                                                      | Numeric sequential ID generated by system. DESIGN_ID_SEQ                                 | CTTI            |

| Variable Name | Variable Label                                                                                                                                                   | Value List                                                                                                                                                                  | Entity Name | NLM Required                                                                                                                                                                                                              | FDAAA Required                                                                                                                                                                                                                   | NLM Definitions                                                                                                                                                                                                                                                                                                                                                                                                                                                                                                                                                                                                                                                                                                                                                                                                                                                                                                                                                                                         | CTTI Definitions                               | Variable Source |
|---------------|------------------------------------------------------------------------------------------------------------------------------------------------------------------|-----------------------------------------------------------------------------------------------------------------------------------------------------------------------------|-------------|---------------------------------------------------------------------------------------------------------------------------------------------------------------------------------------------------------------------------|----------------------------------------------------------------------------------------------------------------------------------------------------------------------------------------------------------------------------------|---------------------------------------------------------------------------------------------------------------------------------------------------------------------------------------------------------------------------------------------------------------------------------------------------------------------------------------------------------------------------------------------------------------------------------------------------------------------------------------------------------------------------------------------------------------------------------------------------------------------------------------------------------------------------------------------------------------------------------------------------------------------------------------------------------------------------------------------------------------------------------------------------------------------------------------------------------------------------------------------------------|------------------------------------------------|-----------------|
| design_name   | Design Name (includes Primary purpose, Interventional Model, Masking, Allocation, Study Classification, Observational Study Model, Timeperspective, and Control) | Primary Purpose<br>Control<br>Time Perspective<br>Additional Descriptors<br>Observational Model<br>Endpoint Classification<br>Interventional Model<br>Masking<br>Allocation | DESIGNS     | Yes (Interventional Study Design)<br><br>No (Primary Purpose)<br><br>No (Intervention Model)<br><br>No (Allocation)<br><br>No (Study Classification)<br><br>Yes (Observational Study Model)<br><br>Yes (Time Perspective) | Maybe (Interventional Study Design)<br><br>Yes (Primary Purpose)<br><br>Maybe (Intervention Model)<br><br>Maybe (Allocation)<br><br>No (Study Classification)<br><br>No (Observational Study Model)<br><br>No (Time Perspective) | Interventional Study Design ** (FDAAA)<br><br>Definition: Primary investigative techniques used in the protocol. Select the most appropriate term describing the protocol from each of the following data elements.<br><br>Primary Purpose FDAAA - reason for the protocol<br><br>o Treatment: protocol designed to evaluate one or more interventions for treating a disease, syndrome or condition<br><br>o Prevention: protocol designed to assess one or more interventions aimed at preventing the development of a specific disease or health condition<br><br>o Diagnostic: protocol designed to evaluate one or more interventions aimed at identifying a disease or health condition<br><br>o Supportive Care: protocol designed to evaluate one or more interventions where the primary intent is to maximize comfort, minimize side effects or mitigate against a decline in the subject's health or function. In general, supportive care interventions are not intended to cure a disease. | Derived from NLM's data element <study_design> | CTTI            |

| Variable Name | Variable Label                                                                   | Value List                                                                                                                                                                                                                                                                                                                                                                                                                                                                                                                                                                                                                                                        | Entity Name | NLM Required                                                                                                                                                                                                                 | FDAAA Required                                                                                                                                                                                                                               | NLM Definitions                                                                                                                                                         | CTTI Definitions                               | Variable Source |
|---------------|----------------------------------------------------------------------------------|-------------------------------------------------------------------------------------------------------------------------------------------------------------------------------------------------------------------------------------------------------------------------------------------------------------------------------------------------------------------------------------------------------------------------------------------------------------------------------------------------------------------------------------------------------------------------------------------------------------------------------------------------------------------|-------------|------------------------------------------------------------------------------------------------------------------------------------------------------------------------------------------------------------------------------|----------------------------------------------------------------------------------------------------------------------------------------------------------------------------------------------------------------------------------------------|-------------------------------------------------------------------------------------------------------------------------------------------------------------------------|------------------------------------------------|-----------------|
| design_value  | Design Value (includes enumerated values for each of the 'Design Name' category) | Psychosocial<br>Health services research<br>Ecologic or community<br>Natural History<br>Defined Population<br>Case-crossover<br>Case-only<br>Case-control<br>Cohort<br>Uncontrolled<br>Placebo Control<br>Historical Control<br>Dose Comparison<br>Active<br>Pharmacokinetics/dynamics Study<br>Pharmacodynamics Study<br>Pharmacokinetics Study<br>Bio-availability Study<br>Bio-equivalence Study<br>Safety/Efficacy Study<br>Efficacy Study<br>Safety Study<br>N/A<br>Random Sample<br>Non-randomized<br>Randomized<br>N/A : single study<br>Double blind (Participant, Investigator, outcome assessor, Caregiver)<br>Single blind (Participant, Investigator, | DESIGNS     | Yes<br>(Interventional Study Design)<br><br>No (Primary Purpose)<br><br>No (Intervention Model)<br><br>No (Allocation)<br><br>No (Study Classification)<br><br>Yes (Observational Study Model)<br><br>Yes (Time Perspective) | Maybe<br>(Interventional Study Design)<br><br>Yes (Primary Purpose)<br><br>Maybe<br>(Intervention Model)<br><br>Maybe<br>(Allocation)<br><br>No (Study Classification)<br><br>No<br>(Observational Study Model)<br><br>No (Time Perspective) | Included in "Design name"                                                                                                                                               | Derived from NLM's data element <study_design> | CTTI            |
| masked_role   | Masked Role                                                                      |                                                                                                                                                                                                                                                                                                                                                                                                                                                                                                                                                                                                                                                                   | DESIGNS     | No                                                                                                                                                                                                                           | Maybe                                                                                                                                                                                                                                        | Included in "Design name"<br><br><br>If Single Blind or Double Blind is selected, check the role(s) that are to be masked: Subject, Caregiver, Investigator or Outcomes | Derived from NLM's data element <study_design> | CTTI            |

| Variable Name    | Variable Label                          | Value List | Entity Name             | NLM Required | FDAAA Required | NLM Definitions                                                                                                                                                                                      | CTTI Definitions                                                                                                                                                                                                                                                                                        | Variable Source |
|------------------|-----------------------------------------|------------|-------------------------|--------------|----------------|------------------------------------------------------------------------------------------------------------------------------------------------------------------------------------------------------|---------------------------------------------------------------------------------------------------------------------------------------------------------------------------------------------------------------------------------------------------------------------------------------------------------|-----------------|
| nct_id           | ClinicalTrials.gov registry number      |            | DESIGNS                 | No           | No             | N/A                                                                                                                                                                                                  | The NCT number is a unique number assigned by clinicaltrials.gov to each clinical trial.                                                                                                                                                                                                                | NLM             |
| facility_id      | Primary Key for FACILITIES              |            | FACILITIES              | N/A          | N/A            |                                                                                                                                                                                                      | Numeric sequential ID generated by system. FACILITY_ID_SEQ. A record was generated in FACILITIES table for every NCT_ID (unique study ID), even when there is no data under address (<name>) for that NCT_ID from ClinicalTrials.gov dataset. In this case the record has NULL value for name variable. | CTTI            |
| location_id      | Foreign Key for LOCATIONS               |            | FACILITIES              | N/A          | N/A            |                                                                                                                                                                                                      | Numeric sequential ID generated by system. LOCATION_ID_SEQ                                                                                                                                                                                                                                              | CTTI            |
| name             | Facility Name                           |            | FACILITIES              | Yes          | Maybe          | Full name of the organization where the protocol is being conducted. (Limit: 254 characters). Examples: UCLA Eye Institute; Springfield Memorial Hospital                                            |                                                                                                                                                                                                                                                                                                         | NLM             |
| nct_id           | ClinicalTrials.gov registry number      |            | FACILITIES              | No           | No             | N/A                                                                                                                                                                                                  | The NCT number is a unique number assigned by clinicaltrials.gov to each clinical trial.                                                                                                                                                                                                                | NLM             |
| arm_group_label  | Intervention Arms/Groups Label          |            | INTERVENTION_ARM_GROUPS | Yes          | Maybe          | Arm Label - the short name used to identify the arm. (Limit: 62 characters).<br><br>* (FDAAA)<br><br>Group/Cohort Label - the short name used to identify the group. (Limit: 62 characters)<br><br>* |                                                                                                                                                                                                                                                                                                         | NLM             |
| int_arm_group_id | Primary key for INTERVENTION_ARM_GROUPS |            | INTERVENTION_ARM_GROUPS | N/A          | N/A            |                                                                                                                                                                                                      | Numeric sequential ID generated by system. INT_ARM_GROUP_ID_SEQ                                                                                                                                                                                                                                         | CTTI            |
| intervention_id  | Foreign Key for INTERVENTIONS           |            | INTERVENTION_ARM_GROUPS | N/A          | N/A            |                                                                                                                                                                                                      | Numeric sequential ID generated by system. INTERVENTION_ID_SEQ                                                                                                                                                                                                                                          | CTTI            |

| Variable Name        | Variable Label                           | Value List | Entity Name              | NLM Required | FDAAA Required | NLM Definitions                                                                                                                                                                                                                                                                                                                                                                                | CTTI Definitions                                                                         | Variable Source |
|----------------------|------------------------------------------|------------|--------------------------|--------------|----------------|------------------------------------------------------------------------------------------------------------------------------------------------------------------------------------------------------------------------------------------------------------------------------------------------------------------------------------------------------------------------------------------------|------------------------------------------------------------------------------------------|-----------------|
| nct_id               | ClinicalTrials.gov registry number       |            | INTERVENTION_ARM_GROUPS  | No           | No             | N/A                                                                                                                                                                                                                                                                                                                                                                                            | The NCT number is a unique number assigned by clinicaltrials.gov to each clinical trial. | NLM             |
| mesh_intervention_id | Primary Key for INTERVENTION_BROWSE      |            | INTERVENTION_BROWSE      | N/A          | N/A            |                                                                                                                                                                                                                                                                                                                                                                                                | Numeric sequential ID generated by system. MESH_INTERVENTION_ID_SEQ                      | CTTI            |
| mesh_term            | Intervention MeSH terms                  |            | INTERVENTION_BROWSE      | No           | No             | N/A                                                                                                                                                                                                                                                                                                                                                                                            | Intervention MeSH terms generated by NLM algorithm                                       | NLM             |
| nct_id               | ClinicalTrials.gov registry number       |            | INTERVENTION_BROWSE      | No           | No             | N/A                                                                                                                                                                                                                                                                                                                                                                                            | The NCT number is a unique number assigned by clinicaltrials.gov to each clinical trial. | NLM             |
| int_other_name_id    | Primary Key for INTERVENTION_OTHER_NAMES |            | INTERVENTION_OTHER_NAMES | N/A          | N/A            |                                                                                                                                                                                                                                                                                                                                                                                                | Numeric sequential ID generated by system. INT_OTHER_NAME_SEQ                            | CTTI            |
| intervention_id      | Foreign Key for INTERVENTIONS            |            | INTERVENTION_OTHER_NAMES | N/A          | N/A            |                                                                                                                                                                                                                                                                                                                                                                                                | Numeric sequential ID generated by system. INTERVENTION_ID_SEQ                           | CTTI            |
| nct_id               | ClinicalTrials.gov registry number       |            | INTERVENTION_OTHER_NAMES | No           | No             | N/A                                                                                                                                                                                                                                                                                                                                                                                            | The NCT number is a unique number assigned by clinicaltrials.gov to each clinical trial. | NLM             |
| other_name           | Other Names                              |            | INTERVENTION_OTHER_NAMES | No           | No             | list other names used to identify the intervention, past or present (e.g., brand name for a drug). These names will be used to improve search results in ClinicalTrials.gov. (Limit: 160 characters per name)                                                                                                                                                                                  |                                                                                          | NLM             |
| description          | Intervention Description                 |            | INTERVENTIONS            | No           | Maybe          | Cover key details of the intervention. Must be sufficiently detailed to distinguish between arms of a study (e.g., comparison of different dosages of drug) and/or among similar interventions (e.g., comparison of multiple implantable cardiac defibrillators). For example, interventions involving drugs may include dosage form, dosage, frequency and duration. (Limit: 1000 characters) |                                                                                          | NLM             |

| Variable Name     | Variable Label                     | Value List                                                                                                     | Entity Name   | NLM Required | FDAAA Required | NLM Definitions                                                                                                                                                                                                                                                                                                                                                                                                                                                                                                                                              | CTTI Definitions                                                                         | Variable Source |
|-------------------|------------------------------------|----------------------------------------------------------------------------------------------------------------|---------------|--------------|----------------|--------------------------------------------------------------------------------------------------------------------------------------------------------------------------------------------------------------------------------------------------------------------------------------------------------------------------------------------------------------------------------------------------------------------------------------------------------------------------------------------------------------------------------------------------------------|------------------------------------------------------------------------------------------|-----------------|
| intervention_id   | Primary Key for INTERVENTIONS      |                                                                                                                | INTERVENTIONS | N/A          | N/A            |                                                                                                                                                                                                                                                                                                                                                                                                                                                                                                                                                              | Numeric sequential ID generated by system. INTERVENTION_ID_SEQ                           | CTTI            |
| intervention_name | Intervention Name                  |                                                                                                                | INTERVENTIONS | Yes          | Yes            | <p>For drugs use generic name; for other types of interventions provide a brief descriptive name. (Limit: 160 characters)</p> <p>For investigational new drugs that do not yet have a generic name, a chemical name, company code or serial number may be used on a temporary basis. As soon as the generic name has been established, update the associated protocol records accordingly.</p> <p>For non-drug intervention types, provide an intervention name with sufficient detail so that it can be distinguished from other similar interventions.</p> |                                                                                          | NLM             |
| intervention_type | Intervention Type                  | Drug<br>Procedure<br>Device<br>Biological<br>Radiation<br>Genetic<br>Other<br>Dietary Supplement<br>Behavioral | INTERVENTIONS | Yes          | Yes            | Type of intervention: Drug (including placebo), Device (including sham), Biological/Vaccine, Procedure/Surgery, Radiation, Behavioral (e.g., Psychotherapy, Lifestyle Counseling), Genetic (including gene transfer, stem cell and recombinant DNA), Dietary Supplement (e.g., vitamins, minerals), Other                                                                                                                                                                                                                                                    |                                                                                          | NLM             |
| nct_id            | ClinicalTrials.gov registry number |                                                                                                                | INTERVENTIONS | No           | No             | N/A                                                                                                                                                                                                                                                                                                                                                                                                                                                                                                                                                          | The NCT number is a unique number assigned by clinicaltrials.gov to each clinical trial. | NLM             |
| keyword           | Keywords                           |                                                                                                                | KEYWORDS      | No           | No             | Words or phrases that best describe the protocol. Keywords help users find studies in the database. Use NLM's Medical Subject Heading (MeSH) controlled vocabulary terms where appropriate. Be as specific and precise as possible. Avoid acronyms and                                                                                                                                                                                                                                                                                                       |                                                                                          | NLM             |



| Variable Name | Variable Label                     | Value List | Entity Name       | NLM Required | FDAAA Required | NLM Definitions                                                                                                                                                                                                                                                                                                                                                                                      | CTTI Definitions                                                                         | Variable Source |
|---------------|------------------------------------|------------|-------------------|--------------|----------------|------------------------------------------------------------------------------------------------------------------------------------------------------------------------------------------------------------------------------------------------------------------------------------------------------------------------------------------------------------------------------------------------------|------------------------------------------------------------------------------------------|-----------------|
| keyword_id    | Primary Key for KEYWORDS           |            | KEYWORDS          | N/A          | N/A            |                                                                                                                                                                                                                                                                                                                                                                                                      | Numeric sequential ID generated by system. KEYWORD_ID_SEQ                                | CTTI            |
| nct_id        | ClinicalTrials.gov registry number |            | KEYWORDS          | No           | No             | N/A                                                                                                                                                                                                                                                                                                                                                                                                  | The NCT number is a unique number assigned by clinicaltrials.gov to each clinical trial. | NLM             |
| description   | Description                        |            | LINKS             | No           | No             | Title or brief description of the linked page. If the page being linked is the protocol's home page on the sponsor's Web site, include the words "Click here for more information about this study:" and provide the name of the protocol. (Limit: 254 characters)                                                                                                                                   |                                                                                          | NLM             |
| link_id       | Primary Key for LINKS              |            | LINKS             | N/A          | N/A            |                                                                                                                                                                                                                                                                                                                                                                                                      | Numeric sequential ID generated by system. LINK_ID_SEQ                                   | CTTI            |
| nct_id        | ClinicalTrials.gov registry number |            | LINKS             | No           | No             | N/A                                                                                                                                                                                                                                                                                                                                                                                                  | The NCT number is a unique number assigned by clinicaltrials.gov to each clinical trial. | NLM             |
| url           | URL                                |            | LINKS             | No           | No             | A Web site directly relevant to the protocol may be entered, if desired. Do not include sites whose primary goal is to advertise or sell commercial products or services. Links to educational, research, government, and other non-profit Web pages are acceptable. All submitted links are subject to review by ClinicalTrials.gov.<br><br>complete URL, including http:// (Limit: 254 characters) |                                                                                          | NLM             |
| degrees       | Degree                             |            | LOCATION_CONTACTS | No           | No             | Degree                                                                                                                                                                                                                                                                                                                                                                                               |                                                                                          | NLM             |
| email         | Email                              |            | LOCATION_CONTACTS | Yes          | Maybe          | Email                                                                                                                                                                                                                                                                                                                                                                                                |                                                                                          | NLM             |
| first_name    | First Name                         |            | LOCATION_CONTACTS | No           | No             | First Name                                                                                                                                                                                                                                                                                                                                                                                           |                                                                                          | NLM             |

| Variable Name       | Variable Label                                              | Value List                                | Entity Name       | NLM Required | FDAAA Required | NLM Definitions                                                                                                                                                                                                                                                     | CTTI Definitions                                                                                                                                                                | Variable Source |
|---------------------|-------------------------------------------------------------|-------------------------------------------|-------------------|--------------|----------------|---------------------------------------------------------------------------------------------------------------------------------------------------------------------------------------------------------------------------------------------------------------------|---------------------------------------------------------------------------------------------------------------------------------------------------------------------------------|-----------------|
| full_name           | Full Name                                                   |                                           | LOCATION_CONTACTS | No           | No             |                                                                                                                                                                                                                                                                     | Full name parsed out of NLM's data element <last_name> which contains concatenated first name, middle initial, last name, and degree. For future implementation.                | CTTI            |
| last_name           | Last Name                                                   |                                           | LOCATION_CONTACTS | Yes          | Maybe          | Last Name                                                                                                                                                                                                                                                           | concatenated first name, middle initial, last name, and degree                                                                                                                  | NLM             |
| location_contact_id | Primary Key for LOCATION_CONTACTS                           |                                           | LOCATION_CONTACTS | N/A          | N/A            |                                                                                                                                                                                                                                                                     | Numeric sequential ID generated by system. LOCATION_CONTACT_ID_SEQ                                                                                                              | CTTI            |
| location_id         | Foreign Key for LOCATIONS                                   |                                           | LOCATION_CONTACTS | N/A          | N/A            |                                                                                                                                                                                                                                                                     | Numeric sequential ID generated by system. LOCATION_ID_SEQ. It creates new record in the LOCATIONS table per study even when there is no data for any fields in LOCATIONS table | CTTI            |
| middle_initial      | Middle Initial                                              |                                           | LOCATION_CONTACTS | No           | No             | Middle Initial                                                                                                                                                                                                                                                      |                                                                                                                                                                                 | NLM             |
| nct_id              | ClinicalTrials.gov registry number                          |                                           | LOCATION_CONTACTS | No           | No             | N/A                                                                                                                                                                                                                                                                 | The NCT number is a unique number assigned by clinicaltrials.gov to each clinical trial.                                                                                        | NLM             |
| person_type         | Type of Location contact (contact, backup, or investigator) | Contact<br>Contact Backup<br>Investigator | LOCATION_CONTACTS | Yes          | Maybe          | Facility Contact: Person to contact where the protocol is being conducted.<br><br>* (FDAAA)<br><br>Facility Contact Backup: Person to contact if Facility Contact is not available (i.e., a second contact person).<br><br>Investigators (at the protocol location) | Indicates whether a person type is <investigator>, <contact>, <contact_backup>                                                                                                  | CTTI            |

| Variable Name | Variable Label                                                        | Value List                                                                                                                                | Entity Name       | NLM Required | FDAAA Required | NLM Definitions                                      | CTTI Definitions                                                                                                                                                                                                                                                                                           | Variable Source |
|---------------|-----------------------------------------------------------------------|-------------------------------------------------------------------------------------------------------------------------------------------|-------------------|--------------|----------------|------------------------------------------------------|------------------------------------------------------------------------------------------------------------------------------------------------------------------------------------------------------------------------------------------------------------------------------------------------------------|-----------------|
| phone         | Phone                                                                 |                                                                                                                                           | LOCATION_CONTACTS | Yes          | Maybe          | Phone                                                |                                                                                                                                                                                                                                                                                                            | NLM             |
| phone_ext     | Phone extension                                                       |                                                                                                                                           | LOCATION_CONTACTS | No           | No             | Phone extention                                      |                                                                                                                                                                                                                                                                                                            | NLM             |
| role          | Location Official's Role (Principal Investigator or Sub Investigator) | Principal Investigator<br>Sub-Investigator                                                                                                | LOCATION_CONTACTS | No           | No             | Site Principal Investigator or Site Sub-Investigator |                                                                                                                                                                                                                                                                                                            | NLM             |
| location_id   | Primary Key for LOCATIONS                                             |                                                                                                                                           | LOCATIONS         | N/A          | N/A            |                                                      | Numeric sequential ID generated by system. LOCATION_ID_SEQ. A record was generated in LOCATIONS table for every NCT_ID (unique study ID), even when there is no data under address (<status>) for that NCT_ID from ClinicalTrials.gov dataset. In this case the record has NULL value for status variable. | CTTI            |
| nct_id        | ClinicalTrials.gov registry number                                    |                                                                                                                                           | LOCATIONS         | No           | No             | N/A                                                  | The NCT number is a unique number assigned by clinicaltrials.gov to each clinical trial.                                                                                                                                                                                                                   | NLM             |
| status        | Recruitment Status                                                    | Not yet recruiting<br>Active not recruiting<br>Withdrawn<br>Terminated<br>Suspended<br>Completed<br>Enrolling by invitation<br>Recruiting | LOCATIONS         | Yes          | Yes            | Protocol accrual activity at a facility.             |                                                                                                                                                                                                                                                                                                            | NLM             |
| mesh_id       | MeSH ID or tree number                                                |                                                                                                                                           | MESH_TREES        | N/A          | N/A            |                                                      | MeSH ID or tree number imputed from MeSH term found in a study using MeSH thesaurus.                                                                                                                                                                                                                       | CTTI            |
| mesh_term     | Condition or Intervention MeSH term                                   |                                                                                                                                           | MESH_TREES        | No           | No             | N/A                                                  | Condition or Intervention MeSH terms generated by NLM Algorithm                                                                                                                                                                                                                                            | NLM             |

| Variable Name | Variable Label                                                    | Value List                 | Entity Name    | NLM Required | FDAAA Required | NLM Definitions | CTTI Definitions                                                                                                                                                                                                                                       | Variable Source |
|---------------|-------------------------------------------------------------------|----------------------------|----------------|--------------|----------------|-----------------|--------------------------------------------------------------------------------------------------------------------------------------------------------------------------------------------------------------------------------------------------------|-----------------|
| mesh_tree_id  | Primary Key for MESH_TREES                                        |                            | MESH_TREES     | N/A          | N/A            |                 | Numeric sequential ID generated by system. MESH_TREE_SEQ                                                                                                                                                                                               | CTTI            |
| mesh_type     | Interventional or Conditional MeSH term                           | Interventional Conditional | MESH_TREES     | No           | No             |                 | condition or intervention                                                                                                                                                                                                                              | CTTI            |
| nct_id        | ClinicalTrials.gov registry number                                |                            | MESH_TREES     | No           | No             | N/A             | The NCT number is a unique number assigned by clinicaltrials.gov to each clinical trial.                                                                                                                                                               | NLM             |
| node_name     | Node Name                                                         |                            | MESH_TREES     | No           | No             |                 | Nodes 1 through 12. The node position number in the tree number or MeSH ID. E.g. for MeSH entry 'Head;A01.456', 'A01' is Node 1, and '456' is Node 2.                                                                                                  | CTTI            |
| node_value    | Node Value                                                        |                            | MESH_TREES     | No           | No             |                 | Node value is the three character value for each node. E.g. for MeSH entry 'Head;A01.456', Node 1 value is 'A01' and Node 2 value is '456'.                                                                                                            | CTTI            |
| mesh_id       | MeSH ID or tree number                                            |                            | MESH_TREES_RAW | N/A          | N/A            |                 | MeSH ID or tree number associated with a MeSH term                                                                                                                                                                                                     | CTTI            |
| mesh_term     | Condition or Intervention MeSH term                               |                            | MESH_TREES_RAW | No           | No             |                 | Condition or Intervention MeSH term from MeSH thesaurus downloaded in July 2010                                                                                                                                                                        | CTTI            |
| description   | Description (for secondary as well as primary outcomes)           |                            | OUTCOMES       | No           | No             |                 | Additional information about the outcome measure, if needed for clarification. (Limit: 600 characters)                                                                                                                                                 | NLM             |
| measure       | Outcome Measure Title (for secondary as well as primary outcomes) |                            | OUTCOMES       | Yes          | No             |                 | A concise name for the specific measure that will be used to determine the effect of the intervention(s) or, for observational studies, related to core objectives of the study and receiving the most emphasis in assessment. (Limit: 254 characters) | NLM             |
| nct_id        | ClinicalTrials.gov registry number                                |                            | OUTCOMES       | No           | No             | N/A             | The NCT number is a unique number assigned by clinicaltrials.gov to each clinical trial.                                                                                                                                                               | NLM             |

| Variable Name | Variable Label                                            | Value List | Entity Name | NLM Required | FDAAA Required | NLM Definitions                                                                                                                                                                                                                                                                                                                                                                                                                                                                                                                                  | CTTI Definitions                                          | Variable Source |
|---------------|-----------------------------------------------------------|------------|-------------|--------------|----------------|--------------------------------------------------------------------------------------------------------------------------------------------------------------------------------------------------------------------------------------------------------------------------------------------------------------------------------------------------------------------------------------------------------------------------------------------------------------------------------------------------------------------------------------------------|-----------------------------------------------------------|-----------------|
| outcome_id    | Primary Key for OUTCOMES                                  |            | OUTCOMES    | N/A          | N/A            |                                                                                                                                                                                                                                                                                                                                                                                                                                                                                                                                                  | Numeric sequential ID generated by system. OUTCOME_ID_SEQ | CTTI            |
| safety_issue  | Safety Issue? (for secondary as well as primary outcomes) | yes<br>no  | OUTCOMES    | No           | Maybe          | Is this outcome measure assessing a safety issue? Select: Yes/No                                                                                                                                                                                                                                                                                                                                                                                                                                                                                 |                                                           | NLM             |
| time_frame    | Time Frame (for secondary as well as primary outcomes)    |            | OUTCOMES    | No           | Maybe          | Time point(s) at which outcome measure is assessed. (Limit: 254 characters)                                                                                                                                                                                                                                                                                                                                                                                                                                                                      |                                                           | NLM             |
| type          | Primary or Secondary Outcome                              |            | OUTCOMES    | No           | Yes            | <p>Primary Outcome Measure: Specific key measurement(s) or observation(s) used to measure the effect of experimental variables in a study, or for observational studies, to describe patterns of diseases or traits or associations with exposures, risk factors or treatment.</p> <p>Secondary Outcome Measures: Other key measures that will be used to evaluate the intervention(s) or, for observational studies, that are a focus of the study. Specify Title, Time Frame, Description (if needed) and Safety Issue as described above.</p> |                                                           | NLM             |
| affiliation   | Organizational Affiliation                                |            | PERSONS     | No           | No             | Full name of the official's organization. If none, specify Unaffiliated.<br><br>(Limit: 255 characters)                                                                                                                                                                                                                                                                                                                                                                                                                                          |                                                           | NLM             |
| degrees       | Degree                                                    |            | PERSONS     | No           | No             | Degree                                                                                                                                                                                                                                                                                                                                                                                                                                                                                                                                           |                                                           | NLM             |
| email         | Email                                                     |            | PERSONS     | Yes          | Maybe          | Email                                                                                                                                                                                                                                                                                                                                                                                                                                                                                                                                            |                                                           | NLM             |
| first_name    | First Name                                                |            | PERSONS     | No           | No             | First Name                                                                                                                                                                                                                                                                                                                                                                                                                                                                                                                                       |                                                           | NLM             |

| Variable Name  | Variable Label                      | Value List | Entity Name | NLM Required | FDAAA Required | NLM Definitions                                                                                                             | CTTI Definitions                                                                                                                                                 | Variable Source |
|----------------|-------------------------------------|------------|-------------|--------------|----------------|-----------------------------------------------------------------------------------------------------------------------------|------------------------------------------------------------------------------------------------------------------------------------------------------------------|-----------------|
| full_name      | Full Name                           |            | PERSONS     | No           | No             |                                                                                                                             | Full name parsed out of NLM's data element <last_name> which contains concatenated first name, middle initial, last name, and degree. For future implementation. | CTTI            |
| last_name      | Last Name                           |            | PERSONS     | Yes          | Maybe          | Last Name                                                                                                                   | concatenated first name, middle initial, last name, and degree                                                                                                   | NLM             |
| middle_initial | Middle Initial                      |            | PERSONS     | No           | No             | Middle Initial                                                                                                              |                                                                                                                                                                  | NLM             |
| name_title     | name and title of responsible party |            | PERSONS     | No           | Yes            | Name/Official Title of Responsible Party - for either the principal investigator or sponsor contact (Limit: 254 characters) |                                                                                                                                                                  | NLM             |
| nct_id         | ClinicalTrials.gov registry number  |            | PERSONS     | No           | No             | N/A                                                                                                                         | The NCT number is a unique number assigned by clinicaltrials.gov to each clinical trial.                                                                         | NLM             |
| organization   | organization of responsible party   |            | PERSONS     | No           | Yes            | Organization of Responsible Party - the sponsor or the principal investigator's organizational affiliation (Limit: 254      |                                                                                                                                                                  | NLM             |
| person_id      | Primary Key for Persons             |            | PERSONS     | N/A          | N/A            |                                                                                                                             | Numeric sequential ID. PERSON_ID_SEQ                                                                                                                             | CTTI            |

| Variable Name | Variable Label                                                                                                 | Value List                                                                         | Entity Name | NLM Required                                                                                                   | FDAAA Required                                                                                                    | NLM Definitions                                                                                                                                                                                                                                                                                                                                                                                                                                                                                                                                                                                                                                                                                                                                                                            | CTTI Definitions                                                                                                                 | Variable Source |
|---------------|----------------------------------------------------------------------------------------------------------------|------------------------------------------------------------------------------------|-------------|----------------------------------------------------------------------------------------------------------------|-------------------------------------------------------------------------------------------------------------------|--------------------------------------------------------------------------------------------------------------------------------------------------------------------------------------------------------------------------------------------------------------------------------------------------------------------------------------------------------------------------------------------------------------------------------------------------------------------------------------------------------------------------------------------------------------------------------------------------------------------------------------------------------------------------------------------------------------------------------------------------------------------------------------------|----------------------------------------------------------------------------------------------------------------------------------|-----------------|
| person_type   | Type of Overall official (Overall Study Officials, Central Contact, Central contact backup, Responsible party) | Overall official<br>Responsible party<br>Overall contact backup<br>Overall Contact | PERSONS     | No (Overall Study Officials)<br>Yes (Central Contact)<br>No (Central Contact Backup)<br>No (Responsible Party) | No (Overall Study Officials)<br>Maybe (Central Contact)<br>No (Central Contact Backup)<br>Yes (Responsible Party) | Overall Study Officials: Person(s) responsible for the overall scientific leadership of the protocol, including study principal investigator.<br><br>Central Contact or Overall Contact (or Facility Contact required): Person providing centralized, coordinated recruitment information for the entire study. * (FDAAA)<br><br>Central Contact Backup: Person to contact if Central Contact is not available.<br><br>Responsible Party: As defined in US Public Law 110-85, Title VIII, Section 801, the term "responsible party", with respect to a clinical trial, means<br>1. the sponsor of the clinical trial (as defined in 21 CFR 50.3) or<br>2. the principal investigator of such clinical trial if so designated by a sponsor, grantee, contractor, or awardee, so long as the | Indicates whether a person type is<br><overall_official><br><overall_contact><br><responsible_party><br><overall_contact_backup> | CTTI            |
| phone         | Phone                                                                                                          |                                                                                    | PERSONS     | Yes                                                                                                            | Maybe                                                                                                             | Phone                                                                                                                                                                                                                                                                                                                                                                                                                                                                                                                                                                                                                                                                                                                                                                                      |                                                                                                                                  | NLM             |
| phone_ext     | Phone extension                                                                                                |                                                                                    | PERSONS     | No                                                                                                             | No                                                                                                                | Phone extention                                                                                                                                                                                                                                                                                                                                                                                                                                                                                                                                                                                                                                                                                                                                                                            |                                                                                                                                  | NLM             |
| role          | Overall Official's Role (Study Chair, Study Director)                                                          | Study Chair<br>Study Director                                                      | PERSONS     | No                                                                                                             | No                                                                                                                | Position or function of the official. Select one (Study Chair/Study Director/Study Principal Investigator).                                                                                                                                                                                                                                                                                                                                                                                                                                                                                                                                                                                                                                                                                |                                                                                                                                  | NLM             |

| Variable Name  | Variable Label                     | Value List | Entity Name   | NLM Required | FDAAA Required | NLM Definitions                                                                                                                                                                                                                                                                                                        | CTTI Definitions                                                                         | Variable Source |
|----------------|------------------------------------|------------|---------------|--------------|----------------|------------------------------------------------------------------------------------------------------------------------------------------------------------------------------------------------------------------------------------------------------------------------------------------------------------------------|------------------------------------------------------------------------------------------|-----------------|
| citation       | Citation                           |            | REFERENCES    | No           | No             | Bibliographic reference in NLM's MEDLINE format (Limit: 2000 characters)                                                                                                                                                                                                                                               |                                                                                          | NLM             |
| nct_id         | ClinicalTrials.gov registry number |            | REFERENCES    | No           | No             | N/A                                                                                                                                                                                                                                                                                                                    | The NCT number is a unique number assigned by clinicaltrials.gov to each clinical trial. | NLM             |
| PMID           | MEDLINE Identifier                 |            | REFERENCES    | No           | No             | MEDLINE Identifier: unique PubMed Identifier (PMID) for the citation in MEDLINE                                                                                                                                                                                                                                        |                                                                                          | NLM             |
| reference_id   | Primary Key for REFERENCES         |            | REFERENCES    | N/A          | N/A            |                                                                                                                                                                                                                                                                                                                        | Numeric sequential ID generated by system. REFERENCE_ID_SEQ                              | CTTI            |
| reference_type | Reference or Results Reference     |            | REFERENCES    | No           | No             | Reference: Citations to publications related to the protocol: background and/or results. Provide either the unique PubMed Identifier (PMID) of an article or enter the full bibliographic citation.<br><br>Results Reference: Indicate if the reference provided reports on results from this clinical research study. | indicates whether a reference type is results reference or study reference               | CTTI            |
| nct_id         | ClinicalTrials.gov registry number |            | SECONDARY_IDS | No           | No             | N/A                                                                                                                                                                                                                                                                                                                    | The NCT number is a unique number assigned by clinicaltrials.gov to each clinical trial. | NLM             |
| sec_id         | Primary Key for SECONDARY_IDS      |            | SECONDARY_IDS | N/A          | N/A            |                                                                                                                                                                                                                                                                                                                        | Numeric sequential ID generated by system. SEC_ID_SEQ                                    | CTTI            |
| secondary_id   | Secondary ids                      |            | SECONDARY_IDS | No           | Yes            | Other identification numbers assigned to the protocol, including unique identifiers from other registries and NIH grant numbers, if applicable. (Limit: 30 characters)                                                                                                                                                 |                                                                                          | NLM             |
| agency         | Sponsor Name                       |            | SPONSORS      | Yes          | Yes            | Sponsor Name                                                                                                                                                                                                                                                                                                           | Sponsor Name                                                                             | NLM             |
| agency_class   | Agency Class                       |            | SPONSORS      | No           | No             | N/A                                                                                                                                                                                                                                                                                                                    | Agency class is a derived field by NLM that indicates the broad category of sponsor      | NLM             |
| nct_id         | ClinicalTrials.gov registry number |            | SPONSORS      | No           | No             | N/A                                                                                                                                                                                                                                                                                                                    | The NCT number is a unique number assigned by clinicaltrials.gov to each clinical trial. | NLM             |



| Variable Name | Variable Label                | Value List | Entity Name | NLM Required | FDAAA Required | NLM Definitions                                                                                                                                                                                                                                                                                                                                                                                                                                                                                                                                                                                                                                           | CTTI Definitions                                                 | Variable Source |
|---------------|-------------------------------|------------|-------------|--------------|----------------|-----------------------------------------------------------------------------------------------------------------------------------------------------------------------------------------------------------------------------------------------------------------------------------------------------------------------------------------------------------------------------------------------------------------------------------------------------------------------------------------------------------------------------------------------------------------------------------------------------------------------------------------------------------|------------------------------------------------------------------|-----------------|
| sponsor_id    | Primary Key for SPONSORS      |            | SPONSORS    | N/A          | N/A            |                                                                                                                                                                                                                                                                                                                                                                                                                                                                                                                                                                                                                                                           | Numeric sequential ID generated by system. SPONSOR_ID_SEQ        | CTTI            |
| sponsor_type  | Lead Sponsor or Collaborators |            | SPONSORS    | Yes          | Yes            | <p>Lead Sponsor: Name of primary organization that oversees implementation of study and is responsible for data analysis. For applicable clinical trials, sponsor is defined in 21 CFR 50.3. (Limit: 160 characters) * FDAAA</p> <p>Examples: National Institute of Allergy and Infectious Diseases, Bristol-Myers Squibb.</p> <p>Collaborator: Other organizations (if any) providing support, including funding, design, implementation, data analysis and reporting. The data provider is responsible for confirming all collaborators before listing them. Provide up to 10 full names of collaborating organizations. (Limit: 160 characters per</p> | Indicates whether a sponsor type is lead sponsor or collaborator | CTTI            |
