# Supplementary material for: The Database for Aggregate Analysis of ClinicalTrials.gov (AACT) and Subsequent Regrouping by Clinical Specialty
Source: PLoS One. 2012 Mar 16;7(3):e33677. doi: 10.1371/journal.pone.0033677 (PMC3306288; doi:10.1371/journal.pone.0033677)
Supplement: Table S2 — ClinicalTrials.gov Comprehensive Data Dictionary. (XLSX) [file pone.0033677.s002.xlsx]

## Sheet: Current_Variables
Current Variables
Comments on 'CTTI_Notes' column: CTTI notes are provided for those variables that are either derived from ClinicalTrials.gov data elements (e.g. 'Design_Name' and 'Design_Value' are derived from 'Study_Design'), or are not available in ClinicalTrials.gov Protocol Data Element Definitions (e.g. , 'Agency_Class', 'First_Received_Results_Date', and 'MeSH_Term' etc.), or are defined primarily for CTT…
Variable Name	Variable Label	Codelist Name	Table Name	NLM Definitions current as of May 2010 (2010-05)	CTTI Notes	Data Type	Length	Max Length Utilized	Variable Source
address_id	Primary Key for ADDRESSES		ADDRESSES		Numeric sequential ID generated by system. ADDRESS_ID_SEQ. A record was generated in ADDRESSES table for every NCT_ID (unique study ID), even when there is no data under address (<city>, <state>, <zip>, <country>) for that NCT_ID from ClinicalTrials.gov dataset. In this case the record has NULL values for city, state, zip, and country variables.	NUMBER			CTTI
city	City		ADDRESSES	City		VARCHAR2	50	50	NLM
country	Country		ADDRESSES	Country		VARCHAR2	50	42	NLM
facility_id	Foreign Key for FACILITIES		ADDRESSES		Numeric sequential ID generated by system. FACILITY_ID_SEQ	NUMBER			CTTI
nct_id	ClinicalTrials.gov registry number		ADDRESSES	N/A	The NCT number is a unique number assigned by clinicaltrials.gov to each clinical trial.	VARCHAR2	50	11	NLM
state	State		ADDRESSES	State		VARCHAR2	50	50	NLM
zip	Zip		ADDRESSES	Zip		VARCHAR2	20	20	NLM
arm_group_id	Primary Key for ARM_GROUPS		ARM_GROUPS		Numeric sequential ID generated by system. ARM_GROUP_ID_SEQ	NUMBER			CTTI
arm_group_label	Arm or Group Label		ARM_GROUPS	Arm Label - the short name used to identify the arm. (Limit: 62 characters). * (FDAAA) Group/Cohort Label - the short name used to identify the group. (Limit: 62 characters) *		VARCHAR2	100	63	NLM
arm_group_type	Arm Type	arm_group_type_cd	ARM_GROUPS	Arm Type (Experimental, Active Comparator, Placebo Comparator, Sham Comparator, No intervention, Other)	Although the attribute's name is arm_group_type, the data is available only for "Arm Type".	VARCHAR2	50	20	NLM
description	Arm or Group Description		ARM_GROUPS	Arm Description (FDAAA): Brief description of the arm. This element may not be necessary if the associated intervention descriptions contain sufficient information to describe the arm. (Limit: 999 characters) Group/Cohort Description: Explanation of the nature of the study group (e.g., those with a condition and those without a condition; those with an exposure and those without an exposure). Not…		VARCHAR2	1000	999	NLM
nct_id	ClinicalTrials.gov registry number		ARM_GROUPS	N/A	The NCT number is a unique number assigned by clinicaltrials.gov to each clinical trial.	VARCHAR2	50	11	NLM
authority	Oversight Authorities		AUTHORITIES	The name of each national or international health organization with authority over the protocol. Use the following format for each authority: country: organization name. Examples: United States: Institutional Review Board United States: Food and Drug Administration Germany: Federal Institute for Drugs and Medical Devices Australia: Therapeutic Goods Administration		VARCHAR2	300	255	NLM
authority_id	Primary Key for AUTHORITIES		AUTHORITIES		Numeric sequential ID generated by system. AUTHORITY_ID_SEQ	NUMBER			CTTI
nct_id	ClinicalTrials.gov registry number		AUTHORITIES	N/A	The NCT number is a unique number assigned by clinicaltrials.gov to each clinical trial.	VARCHAR2	50	11	NLM
acronym	Acronym		CLINICAL_STUDY	Acronym or initials used to identify this study, if applicable. Enter only the acronym. If supplied, the acronym is automatically displayed in parentheses following the brief title. (Limit: 14 characters)		VARCHAR2	50	14	NLM
biospec_descr	Biospecimen Description		CLINICAL_STUDY	Specify all types of biospecimens to be retained (e.g., whole blood, serum, white cells, urine, tissue). (Limit: 1000 characters)		VARCHAR2	2000	1136	NLM
biospec_retention	Biospecimen Retention	biospec_retention_cd	CLINICAL_STUDY	Retention status		VARCHAR2	50	19	NLM
brief_summary	Brief Summary		CLINICAL_STUDY	Short description of the protocol intended for the lay public. Include a brief statement of the study hypothesis. (Limit: 5000 characters)		CLOB		5504	NLM
brief_title	Brief Title		CLINICAL_STUDY	Protocol title intended for the lay public. (Limit: 300 characters)		VARCHAR2	1000	300	NLM
completion_date	Study Completion Date		CLINICAL_STUDY	Final date on which data was (or is expected to be) collected. Use the Type menu (Anticipated/Actual).		VARCHAR2	50	14	NLM
completion_date_type	Study Completion Date Type	completion_date_type_cd	CLINICAL_STUDY	A "Type" menu is also included, with options Anticipated and Actual. For active studies, set Type to Anticipated and specify the expected completion date, updating the date as needed over the course of the study. Upon study completion, change Type to Actual and update the date if necessary.		VARCHAR2	50	11	NLM
criteria	Eligibility Criteria		CLINICAL_STUDY	Summary criteria for participant selection. The preferred format includes lists of inclusion and exclusion criteria as shown below. (Limit: 15,000 characters)		CLOB		4823	NLM
detailed_description	Detailed Description		CLINICAL_STUDY	Extended description of the protocol, including more technical information (as compared to the Brief Summary) if desired. Do not include the entire protocol; do not duplicate information recorded in other data elements, such as eligibility criteria or outcome measures. (Limit: 32,000 characters)		CLOB		37694	NLM
download_date	Download Date		CLINICAL_STUDY	N/A	Date of download from NLM	VARCHAR2	200	66	NLM
download_date_dt	Download Date (Parsed)		CLINICAL_STUDY		Date of download from NLM, free text date converted to DATE type	DATE			CTTI
enrollment	Enrollment		CLINICAL_STUDY	Target or Actual Number of Subjects. Number of subjects in the trial.		NUMBER			NLM
enrollment_type	Enrollment Type	enrollment_type_cd	CLINICAL_STUDY	A "Type" menu is also included, with options Anticipated and Actual. For active studies, set Type to Anticipated and specify the expected enrollment, updating the number as needed over the course of the study. Upon study completion, change Type to Actual and update the enrollment if necessary.		VARCHAR2	50	11	NLM
firstreceived_date	First Received Date		CLINICAL_STUDY	N/A	Date of data first available to public (approximate)	VARCHAR2	50	18	NLM
firstreceived_results_date	First Received Results Date		CLINICAL_STUDY	N/A	This tag is available only of those studies that have results and indicates the date when the results were first received.	VARCHAR2	50	18	NLM
gender	Gender	gender_cd	CLINICAL_STUDY	Physical gender of individuals who may participate in the protocol.		VARCHAR2	50	6	NLM
has_dmc	Data Monitoring Committee?	YN	CLINICAL_STUDY	Indicate whether a data monitoring committee has been appointed for this study. The data monitoring committee (board) is a group of independent scientists who are appointed to monitor the safety and scientific integrity of a human research intervention, and to make recommendations to the sponsor regarding the stopping of the trial for efficacy, for harms or for futility. The composition of the co…		VARCHAR2	10	3	NLM
has_expanded_access	Has Expanded Access?	YN	CLINICAL_STUDY	Indicate whether any non-protocol access is to be provided for the investigational drug or device. If so, an Expanded Access record should also be created for this IND/IDE.		VARCHAR2	50	3	NLM
healthy_volunteers	Accepts Healthy Volunteers?	healthy_volunteers_cd	CLINICAL_STUDY	Indicate if persons who have not had the condition(s) being studied or otherwise related conditions or symptoms, as specified in the eligibility requirements, may participate in the study.		VARCHAR2	50	26	NLM
is_fda_regulated	FDA Regulated Intervention?	YN	CLINICAL_STUDY	Indicate whether this trial includes an intervention subject to US Food and Drug Administration regulation under section 351 of the Public Health Service Act or any of the following sections of the Federal Food, Drug and Cosmetic Act: 505, 510(k), 515, 520(m), and 522.		VARCHAR2	50	3	NLM
is_section_801	Is section 801?	YN	CLINICAL_STUDY	If this trial includes an FDA regulated intervention, indicate whether this is an "applicable clinical trial" as defined in US Public Law 110-85, Title VIII, Section 801. Briefly, applicable drug trials include controlled clinical investigations, other than Phase I investigations, of a drug or biologic subject to US FDA regulation. Applicable device clinical trials are controlled trials with heal…		VARCHAR2	50	3	NLM
lastchanged_date	Last Changed Date		CLINICAL_STUDY	N/A	Date of last entry change.	VARCHAR2	50	18	NLM
maximum_age	Maximum Age		CLINICAL_STUDY	Maximum age of participants. Provide a number and a unit of time (years, months, weeks, days, hours or minutes). Select "N/A (No limit)" if no maximum age is indicated.		VARCHAR2	50	11	NLM
minimum_age	Minimum Age		CLINICAL_STUDY	Minimum age of participants. Provide a number and select a unit of time (years, months, weeks, days, hours or minutes). Select "N/A (No limit)" if no minimum age is indicated.		VARCHAR2	50	10	NLM
nct_alias	Alternate NCT_ID		CLINICAL_STUDY	N/A	The NCT_alias contains alternate NCT_ID numbers. Studies were formerly associated with these IDs at one time.	VARCHAR2	200	55	NLM
nct_id	ClinicalTrials.gov registry number		CLINICAL_STUDY	N/A	The NCT number is a unique number assigned by clinicaltrials.gov to each clinical trial.	VARCHAR2	50	11	NLM
number_of_arms	Number of Arms		CLINICAL_STUDY	Number of intervention groups (enter 1 for single-arm study).		NUMBER			NLM
number_of_groups	Number of Groups		CLINICAL_STUDY	Number of study groups/cohorts. Enter 1 for a single-group study. Many observational studies have one group/cohort; case control studies typically have two.		NUMBER			NLM
official_title	Official Title		CLINICAL_STUDY	Official name of the protocol provided by the study principal investigator or sponsor. (Limit: 600 characters)		VARCHAR2	1000	587	NLM
org_study_id	Organization's Unique Protocol id		CLINICAL_STUDY	Unique identification assigned to the protocol by the sponsoring organization, usually an accession number or a variation of a grant number. Multiple studies conducted under the same grant must each have a unique number. (Limit: 30 characters)		VARCHAR2	100	45	NLM
overall_status	Overall Recruitment Status	overall_status_cd	CLINICAL_STUDY	Overall accrual activity for the protocol.		VARCHAR2	200	25	NLM
phase	Study Phase	phase_cd	CLINICAL_STUDY	Phase of investigation, as defined by the US FDA for trials involving investigational new drugs		VARCHAR2	50	15	NLM
primary_completion_date	Primary Completion Date		CLINICAL_STUDY	As specified in US Public Law 110-85, Title VIII, Section 801, with respect to an applicable clinical trial, the date that the final subject was examined or received an intervention for the purposes of final collection of data for the primary outcome, whether the clinical trial concluded according to the prespecified protocol or was terminated. A "Type" menu is also included, with options Anticip…		VARCHAR2	50	14	NLM
primary_completion_date_type	Primary Completion Date Type	primary_completion_date_type_cd	CLINICAL_STUDY	A "Type" menu is also included, with options Anticipated and Actual. For active studies, set Type to Anticipated and specify the expected completion date, updating the date as needed over the course of the study. Upon study completion, change Type to Actual and update the date if necessary.		VARCHAR2	50	11	NLM
sampling_method	Sampling Method	sampling_method_cd	CLINICAL_STUDY	For observational studies only, select one and explain in Detailed Description.		VARCHAR2	100	22	NLM
source	Source		CLINICAL_STUDY	N/A	Similar to Lead sponsor, but may indicate who the data was submitted on behalf of, or a subsidiary of the sponsor.	VARCHAR2	200	147	NLM
start_date	Study Start Date		CLINICAL_STUDY	Date that enrollment to the protocol begins.		VARCHAR2	50	14	NLM
study_design	Study Design		CLINICAL_STUDY	Interventional or Observational study design		VARCHAR2	1000	273	NLM
study_pop	Study Population Description		CLINICAL_STUDY	For observational studies only, a description of the population from which the groups or cohorts will be selected (e.g., primary care clinic, community sample, residents of a certain town). (Limit: 1000 characters)		VARCHAR2	2000	1111	NLM
study_type	Study Type	study_type_cd	CLINICAL_STUDY	Nature of the investigation. * Interventional: studies in human beings in which individuals are assigned by an investigator based on a protocol to receive specific interventions. Subjects may receive diagnostic, therapeutic or other types of interventions. The assignment of the intervention may or may not be random. The individuals are then followed and biomedical and/or health outcomes are asses…		VARCHAR2	100	15	NLM
verification_date	Record Verification Date		CLINICAL_STUDY	Date the protocol information was last verified. Verification date is shown along with organization name on ClinicalTrials.gov to indicate to the public whether the information is being kept current, particularly recruiting status and contact information. Update verification date when reviewing the record for accuracy and completeness, even if no other changes are made.		VARCHAR2	50	14	NLM
why_stopped	Why Study Stopped		CLINICAL_STUDY	For suspended, terminated or withdrawn studies, provide a brief explanation of why the study has been halted or terminated. If desired, use brief summary or detailed description to provide additional information. (Limit: 160 characters)		VARCHAR2	1000	173	NLM
mesh_condition_id	Primary Key for CONDITION_BROWSE		CONDITION_BROWSE		Numeric sequential ID generated by system. MESH_CONDITION_ID_SEQ	NUMBER	10		CTTI
mesh_term	Condition MeSH terms		CONDITION_BROWSE	N/A	Condition MeSH terms generated by NLM algorithm	VARCHAR2	500	58	NLM
nct_id	ClinicalTrials.gov registry number		CONDITION_BROWSE	N/A	The NCT number is a unique number assigned by clinicaltrials.gov to each clinical trial.	VARCHAR2	50	11	NLM
condition	Condition		CONDITIONS	Primary disease or condition being studied, or focus of the study. Diseases or conditions should use the National Library of Medicine's Medical Subject Headings (MeSH) controlled vocabulary when possible.		VARCHAR2	200	159	NLM
condition_id	Primary Key for CONDITIONS		CONDITIONS		Numeric sequential ID generated by system. CONDITION_ID_SEQ	NUMBER			CTTI
nct_id	ClinicalTrials.gov registry number		CONDITIONS	N/A	The NCT number is a unique number assigned by clinicaltrials.gov to each clinical trial.	VARCHAR2	50	11	NLM
design_id	Primary Key for DESIGNS		DESIGNS		Numeric sequential ID generated by system. DESIGN_ID_SEQ	NUMBER			CTTI
design_name	Design Name (includes Primary purpose, Interventional Model, Masking, Allocation, Study Classification, Observational Study Model, Timeperspective, and Control)	design_name_cd	DESIGNS	Interventional Study Design * (FDAAA) Definition: Primary investigative techniques used in the protocol. Select the most appropriate term describing the protocol from each of the following data elements. Primary Purpose FDAAA - reason for the protocol o Treatment: protocol designed to evaluate one or more interventions for treating a disease, syndrome or condition o Prevention: protocol designed …	Derived from NLM's data element <study_design>	VARCHAR2	500	23	CTTI
design_value	Design Value (includes enumerated values for each of the 'Design Name' category)	design_value_cd	DESIGNS	Included in "Design name"	Derived from NLM's data element <study_design>	VARCHAR2	500	31	CTTI
masked_role	Masked Role		DESIGNS	Included in "Design name" If Single Blind or Double Blind is selected, check the role(s) that are to be masked: Subject, Caregiver, Investigator or Outcomes Assessor.	Derived from NLM's data element <study_design>	VARCHAR2	500	48	CTTI
nct_id	ClinicalTrials.gov registry number		DESIGNS	N/A	The NCT number is a unique number assigned by clinicaltrials.gov to each clinical trial.	VARCHAR2	50	11	NLM
facility_id	Primary Key for FACILITIES		FACILITIES		Numeric sequential ID generated by system. FACILITY_ID_SEQ. A record was generated in FACILITIES table for every NCT_ID (unique study ID), even when there is no data under address (<name>) for that NCT_ID from ClinicalTrials.gov dataset. In this case the record has NULL value for name variable.	NUMBER			CTTI
location_id	Foreign Key for LOCATIONS		FACILITIES		Numeric sequential ID generated by system. LOCATION_ID_SEQ	NUMBER			CTTI
name	Facility Name		FACILITIES	Full name of the organization where the protocol is being conducted. (Limit: 254 characters). Examples: UCLA Eye Institute; Springfield Memorial Hospital		VARCHAR2	500	100	NLM
nct_id	ClinicalTrials.gov registry number		FACILITIES	N/A	The NCT number is a unique number assigned by clinicaltrials.gov to each clinical trial.	VARCHAR2	50	11	NLM
arm_group_label	Intervention Arms/Groups Label		INTERVENTION_ARM_GROUPS	Arm Label - the short name used to identify the arm. (Limit: 62 characters). * (FDAAA) Group/Cohort Label - the short name used to identify the group. (Limit: 62 characters) *		VARCHAR2	100	63	NLM
int_arm_group_id	Primary key for INTERVENTION_ARM_GROUPS		INTERVENTION_ARM_GROUPS		Numeric sequential ID generated by system. INT_ARM_GROUP_ID_SEQ	NUMBER			CTTI
intervention_id	Foreign Key for INTERVENTIONS		INTERVENTION_ARM_GROUPS		Numeric sequential ID generated by system. INTERVENTION_ID_SEQ	NUMBER			CTTI
nct_id	ClinicalTrials.gov registry number		INTERVENTION_ARM_GROUPS	N/A	The NCT number is a unique number assigned by clinicaltrials.gov to each clinical trial.	VARCHAR2	50	11	NLM
mesh_intervention_id	Primary Key for INTERVENTION_BROWSE		INTERVENTION_BROWSE		Numeric sequential ID generated by system. MESH_INTERVENTION_ID_SEQ	NUMBER	10		CTTI
mesh_term	Intervention MeSH terms		INTERVENTION_BROWSE	N/A	Intervention MeSH terms generated by NLM algorithm	VARCHAR2	500	104	NLM
nct_id	ClinicalTrials.gov registry number		INTERVENTION_BROWSE	N/A	The NCT number is a unique number assigned by clinicaltrials.gov to each clinical trial.	VARCHAR2	50	11	NLM
int_other_name_id	Primary Key for INTERVENTION_OTHER_NAMES		INTERVENTION_OTHER_NAMES		Numeric sequential ID generated by system. INT_OTHER_NAME_SEQ	NUMBER			CTTI
intervention_id	Foreign Key for INTERVENTIONS		INTERVENTION_OTHER_NAMES		Numeric sequential ID generated by system. INTERVENTION_ID_SEQ	NUMBER			CTTI
nct_id	ClinicalTrials.gov registry number		INTERVENTION_OTHER_NAMES	N/A	The NCT number is a unique number assigned by clinicaltrials.gov to each clinical trial.	VARCHAR2	50	11	NLM
other_name	Other Names		INTERVENTION_OTHER_NAMES	list other names used to identify the intervention, past or present (e.g., brand name for a drug). These names will be used to improve search results in ClinicalTrials.gov. (Limit: 160 characters per name)		VARCHAR2	160	160	NLM
description	Intervention Description		INTERVENTIONS	Cover key details of the intervention. Must be sufficiently detailed to distinguish between arms of a study (e.g., comparison of different dosages of drug) and/or among similar interventions (e.g., comparison of multiple implantable cardiac defibrillators). For example, interventions involving drugs may include dosage form, dosage, frequency and duration. (Limit: 1000 characters)		VARCHAR2	1000	1000	NLM
intervention_id	Primary Key for INTERVENTIONS		INTERVENTIONS		Numeric sequential ID generated by system. INTERVENTION_ID_SEQ	NUMBER			CTTI
intervention_name	Intervention Name		INTERVENTIONS	For drugs use generic name; for other types of interventions provide a brief descriptive name. (Limit: 160 characters) For investigational new drugs that do not yet have a generic name, a chemical name, company code or serial number may be used on a temporary basis. As soon as the generic name has been established, update the associated protocol records accordingly. For non-drug intervention type…		VARCHAR2	160	160	NLM
intervention_type	Intervention Type	intervention_type_cd	INTERVENTIONS	Type of intervention: Drug (including placebo), Device (including sham), Biological/Vaccine, Procedure/Surgery, Radiation, Behavioral (e.g., Psychotherapy, Lifestyle Counseling), Genetic (including gene transfer, stem cell and recombinant DNA), Dietary Supplement (e.g., vitamins, minerals), Other		VARCHAR2	100	18	NLM
nct_id	ClinicalTrials.gov registry number		INTERVENTIONS	N/A	The NCT number is a unique number assigned by clinicaltrials.gov to each clinical trial.	VARCHAR2	50	11	NLM
keyword	Keywords		KEYWORDS	Words or phrases that best describe the protocol. Keywords help users find studies in the database. Use NLM's Medical Subject Heading (MeSH) controlled vocabulary terms where appropriate. Be as specific and precise as possible. Avoid acronyms and abbreviations.		VARCHAR2	200	160	NLM
keyword_id	Primary Key for KEYWORDS		KEYWORDS		Numeric sequential ID generated by system. KEYWORD_ID_SEQ	NUMBER			CTTI
nct_id	ClinicalTrials.gov registry number		KEYWORDS	N/A	The NCT number is a unique number assigned by clinicaltrials.gov to each clinical trial.	VARCHAR2	50	11	NLM
description	Description		LINKS	Title or brief description of the linked page. If the page being linked is the protocol's home page on the sponsor's Web site, include the words "Click here for more information about this study:" and provide the name of the protocol. (Limit: 254 characters)		VARCHAR2	254	254	NLM
link_id	Primary Key for LINKS		LINKS		Numeric sequential ID generated by system. LINK_ID_SEQ	NUMBER			CTTI
nct_id	ClinicalTrials.gov registry number		LINKS	N/A	The NCT number is a unique number assigned by clinicaltrials.gov to each clinical trial.	VARCHAR2	50	11	NLM
url	URL		LINKS	A Web site directly relevant to the protocol may be entered, if desired. Do not include sites whose primary goal is to advertise or sell commercial products or services. Links to educational, research, government, and other non-profit Web pages are acceptable. All submitted links are subject to review by ClinicalTrials.gov. complete URL, including http:// (Limit: 254 characters)		VARCHAR2	254	254	NLM
degrees	Degree		LOCATION_CONTACTS	Degree		VARCHAR2	100	0	NLM
email	Email		LOCATION_CONTACTS	Email		VARCHAR2	200	181	NLM
first_name	First Name		LOCATION_CONTACTS	First Name		VARCHAR2	50	0	NLM
full_name	Full Name		LOCATION_CONTACTS		Full name parsed out of NLM's data element <last_name> which contains concatenated first name, middle initial, last name, and degree. For future implementation.	VARCHAR2	100	0	CTTI
last_name	Last Name		LOCATION_CONTACTS	Last Name	concatenated first name, middle initial, last name, and degree	VARCHAR2	100	94	NLM
location_contact_id	Primary Key for LOCATION_CONTACTS		LOCATION_CONTACTS		Numeric sequential ID generated by system. LOCATION_CONTACT_ID_SEQ	NUMBER			CTTI
location_id	Foreign Key for LOCATIONS		LOCATION_CONTACTS		Numeric sequential ID generated by system. LOCATION_ID_SEQ. It creates new record in the LOCATIONS table per study even when there is no data for any fields in LOCATIONS table	NUMBER			CTTI
middle_initial	Middle Initial		LOCATION_CONTACTS	Middle Initial		VARCHAR2	50	0	NLM
nct_id	ClinicalTrials.gov registry number		LOCATION_CONTACTS	N/A	The NCT number is a unique number assigned by clinicaltrials.gov to each clinical trial.	VARCHAR2	50	11	NLM
person_type	Type of Location contact (contact, backup, or investigator)	location_person_type_cd	LOCATION_CONTACTS	Facility Contact: Person to contact where the protocol is being conducted. * (FDAAA) Facility Contact Backup: Person to contact if Facility Contact is not available (i.e., a second contact person). Investigators (at the protocol location)	Indicates whether a person type is <investigator>, <contact>, <contact_backup>	VARCHAR2	100	23	CTTI
phone	Phone		LOCATION_CONTACTS	Phone		VARCHAR2	20	20	NLM
phone_ext	Phone extension		LOCATION_CONTACTS	Phone extention		VARCHAR2	20	14	NLM
role	Location Official's Role (Principal Investigator or Sub Investigator)	location_role_cd	LOCATION_CONTACTS	Site Principal Investigator or Site Sub-Investigator		VARCHAR2	100	22	NLM
location_id	Primary Key for LOCATIONS		LOCATIONS		Numeric sequential ID generated by system. LOCATION_ID_SEQ. A record was generated in LOCATIONS table for every NCT_ID (unique study ID), even when there is no data under address (<status>) for that NCT_ID from ClinicalTrials.gov dataset. In this case the record has NULL value for status variable.	NUMBER			CTTI
nct_id	ClinicalTrials.gov registry number		LOCATIONS	N/A	The NCT number is a unique number assigned by clinicaltrials.gov to each clinical trial.	VARCHAR2	50	11	NLM
status	Recruitment Status	status_cd	LOCATIONS	Protocol accrual activity at a facility.		VARCHAR2	50	23	NLM
mesh_id	MeSH ID or tree number		MESH_TREES		MeSH ID or tree number imputed from MeSH term found in a study using MeSH thesaurus.	VARCHAR2	50	43	CTTI
mesh_term	Condition or Intervention MeSH term		MESH_TREES	N/A	Condition or Intervention MeSH terms generated by NLM Algorithm	VARCHAR2	200	58	NLM
mesh_tree_id	Primary Key for MESH_TREES		MESH_TREES		Numeric sequential ID generated by system. MESH_TREE_SEQ	NUMBER			CTTI
mesh_type	Interventional or Conditional MeSH term	mesh_type_cd	MESH_TREES		condition or intervention	VARCHAR2	100	19	CTTI
nct_id	ClinicalTrials.gov registry number		MESH_TREES	N/A	The NCT number is a unique number assigned by clinicaltrials.gov to each clinical trial.	VARCHAR2	50	11	NLM
node_name	Node Name		MESH_TREES		Nodes 1 through 12. The node position number in the tree number or MeSH ID. E.g. for MeSH entry 'Head;A01.456', 'A01' is Node 1, and '456' is Node 2.	VARCHAR2	10	6	CTTI
node_value	Node Value		MESH_TREES		Node value is the three character value for each node. E.g. for MeSH entry 'Head;A01.456', Node 1 value is 'A01' and Node 2 value is '456'.	VARCHAR2	10	3	CTTI
mesh_id	MeSH ID or tree number		MESH_TREES_RAW		MeSH ID or tree number associated with a MeSH term	VARCHAR2	50	47	CTTI
mesh_term	Condition or Intervention MeSH term		MESH_TREES_RAW		Condition or Intervention MeSH term from MeSH thesaurus downloaded in July 2010	VARCHAR2	200	104	CTTI
description	Description (for secondary as well as primary outcomes)		OUTCOMES	Additional information about the outcome measure, if needed for clarification. (Limit: 600 characters)		VARCHAR2	600	600	NLM
measure	Outcome Measure Title (for secondary as well as primary outcomes)		OUTCOMES	A concise name for the specific measure that will be used to determine the effect of the intervention(s) or, for observational studies, related to core objectives of the study and receiving the most emphasis in assessment. (Limit: 254 characters)		VARCHAR2	254	254	NLM
nct_id	ClinicalTrials.gov registry number		OUTCOMES	N/A	The NCT number is a unique number assigned by clinicaltrials.gov to each clinical trial.	VARCHAR2	50	11	NLM
outcome_id	Primary Key for OUTCOMES		OUTCOMES		Numeric sequential ID generated by system. OUTCOME_ID_SEQ	NUMBER			CTTI
safety_issue	Safety Issue? (for secondary as well as primary outcomes)	YN	OUTCOMES	Is this outcome measure assessing a safety issue? Select: Yes/No		VARCHAR2	50	3	NLM
time_frame	Time Frame (for secondary as well as primary outcomes)		OUTCOMES	Time point(s) at which outcome measure is assessed. (Limit: 254 characters)		VARCHAR2	254	254	NLM
type	Primary or Secondary Outcome		OUTCOMES	Primary Outcome Measure: Specific key measurement(s) or observation(s) used to measure the effect of experimental variables in a study, or for observational studies, to describe patterns of diseases or traits or associations with exposures, risk factors or treatment. Secondary Outcome Measures: Other key measures that will be used to evaluate the intervention(s) or, for observational studies, tha…		VARCHAR2	50	17	NLM
affiliation	Organizational Affiliation		PERSONS	Full name of the official's organization. If none, specify Unaffiliated. (Limit: 255 characters)		VARCHAR2	200	200	NLM
degrees	Degree		PERSONS	Degree		VARCHAR2	100	0	NLM
email	Email		PERSONS	Email		VARCHAR2	200	54	NLM
first_name	First Name		PERSONS	First Name		VARCHAR2	50	0	NLM
full_name	Full Name		PERSONS		Full name parsed out of NLM's data element <last_name> which contains concatenated first name, middle initial, last name, and degree. For future implementation.	VARCHAR2	100	0	CTTI
last_name	Last Name		PERSONS	Last Name	concatenated first name, middle initial, last name, and degree	VARCHAR2	100	100	NLM
middle_initial	Middle Initial		PERSONS	Middle Initial		VARCHAR2	50	0	NLM
name_title	name and title of responsible party		PERSONS	Name/Official Title of Responsible Party - for either the principal investigator or sponsor contact (Limit: 254 characters)		VARCHAR2	100	100	NLM
nct_id	ClinicalTrials.gov registry number		PERSONS	N/A	The NCT number is a unique number assigned by clinicaltrials.gov to each clinical trial.	VARCHAR2	50	11	NLM
organization	organization of responsible party		PERSONS	Organization of Responsible Party - the sponsor or the principal investigator's organizational affiliation (Limit: 254 characters)		VARCHAR2	200	200	NLM
person_id	Primary Key for Persons		PERSONS		Numeric sequential ID. PERSON_ID_SEQ	NUMBER			CTTI
person_type	Type of Overall official (Overall Study Officials, Central Contact, Central contact backup, Responsible party)	person_type_cd	PERSONS	Overall Study Officials: Person(s) responsible for the overall scientific leadership of the protocol, including study principal investigator. Central Contact or Overall Contact (or Facility Contact required): Person providing centralized, coordinated recruitment information for the entire study. * (FDAAA) Central Contact Backup: Person to contact if Central Contact is not available. Responsible P…	Indicates whether a person type is <overall_official> <overall_Contact> <resposible_party> <overall_contact_backup>	VARCHAR2	100	22	CTTI
phone	Phone		PERSONS	Phone		VARCHAR2	20	20	NLM
phone_ext	Phone extension		PERSONS	Phone extention		VARCHAR2	20	14	NLM
role	Overall Official's Role (Study Chair, Study Director)	role_cd	PERSONS	Position or function of the official. Select one (Study Chair/Study Director/Study Principal Investigator).		VARCHAR2	100	22	NLM
citation	Citation		REFERENCES	Bibliographic reference in NLM's MEDLINE format (Limit: 2000 characters)		CLOB		16700	NLM
nct_id	ClinicalTrials.gov registry number		REFERENCES	N/A	The NCT number is a unique number assigned by clinicaltrials.gov to each clinical trial.	VARCHAR2	50	11	NLM
PMID	MEDLINE Identifier		REFERENCES	MEDLINE Identifier: unique PubMed Identifier (PMID) for the citation in MEDLINE		VARCHAR2	20	8	NLM
reference_id	Primary Key for REFERENCES		REFERENCES		Numeric sequential ID generated by system. REFERENCE_ID_SEQ	NUMBER			CTTI
reference_type	Reference or Results Reference		REFERENCES	Reference: Citations to publications related to the protocol: background and/or results. Provide either the unique PubMed Identifier (PMID) of an article or enter the full bibliographic citation. Results Reference: Indicate if the reference provided reports on results from this clinical research study.	indicates whether a reference type is results reference or study reference	VARCHAR2	50	17	CTTI
nct_id	ClinicalTrials.gov registry number		SECONDARY_IDS	N/A	The NCT number is a unique number assigned by clinicaltrials.gov to each clinical trial.	VARCHAR2	50	11	NLM
sec_id	Primary Key for SECONDARY_IDs		SECONDARY_IDS		Numeric sequential ID generated by system. SEC_ID_SEQ	NUMBER			CTTI
secondary_id	Secondary ids		SECONDARY_IDS	Other identification numbers assigned to the protocol, including unique identifiers from other registries and NIH grant numbers, if applicable. (Limit: 30 characters)		VARCHAR2	100	39	NLM
agency	Sponsor Name		SPONSORS	Sponsor Name	Sponsor Name	VARCHAR2	200	152	NLM
agency_class	Agency Class		SPONSORS	N/A	Agency class is a derived field by NLM that indicates the broad catergory of sponsor	VARCHAR2	50	8	NLM
nct_id	ClinicalTrials.gov registry number		SPONSORS	N/A	The NCT number is a unique number assigned by clinicaltrials.gov to each clinical trial.	VARCHAR2	50	11	NLM
sponsor_id	Primary Key for SPONSORS		SPONSORS		Numeric sequential ID generated by system. SPONSOR_ID_SEQ	NUMBER			CTTI
sponsor_type	Lead Sponsor or Collaborators		SPONSORS	Lead Sponsor: Name of primary organization that oversees implementation of study and is responsible for data analysis. For applicable clinical trials, sponsor is defined in 21 CFR 50.3. (Limit: 160 characters) * FDAAA Examples: National Institute of Allergy and Infectious Diseases, Bristol-Myers Squibb. Collaborator: Other organizations (if any) providing support, including funding, design, imple…	Indicates whether a sponsor type is lead sponsor or collaborator	VARCHAR2	50	12	CTTI

## Sheet: Enumerations
Enumerations
Codelist_Name	Enumerated_Values
YN	yes
YN	no
healthy_volunteers_cd	Accepts healthy volunteers
healthy_volunteers_cd	No
overall_status_cd	Not yet recruiting
overall_status_cd	Recruiting
overall_status_cd	Enrolling by invitation
overall_status_cd	Active, not recruiting
overall_status_cd	Completed
overall_status_cd	Suspended
overall_status_cd	Terminated
overall_status_cd	Withdrawn
overall_status_cd	Available
overall_status_cd	No Longer Available
overall_status_cd	Temporarily not available
overall_status_cd	Approved for marketing
overall_status_cd	Withheld
phase_cd	N/A
phase_cd	Phase 0
phase_cd	Phase 1
phase_cd	Phase 1/Phase 2
phase_cd	Phase 2
phase_cd	Phase 2/Phase 3
phase_cd	Phase 3
phase_cd	Phase 4
study_type_cd	Interventional
study_type_cd	Observational
study_type_cd	Expanded access
study_type_cd	N/A
enrollment_type_cd	Actual
enrollment_type_cd	Anticipated
arm_group_type_cd	Experimental
arm_group_type_cd	Active Comparator
arm_group_type_cd	Placebo Comparator
arm_group_type_cd	Sham Comparator
arm_group_type_cd	No intervention
arm_group_type_cd	Other
arm_group_type_cd	Case
arm_group_type_cd	Control
arm_group_type_cd	Treatment Comparison
arm_group_type_cd	Exposure Comparison
intervention_type_cd	Drug
intervention_type_cd	Device
intervention_type_cd	Biological
intervention_type_cd	Procedure
intervention_type_cd	Radiation
intervention_type_cd	Behavioral
intervention_type_cd	Genetic
intervention_type_cd	Dietary Supplement
intervention_type_cd	Other
biospec_retention_cd	None Retained
biospec_retention_cd	Samples With DNA
biospec_retention_cd	Samples Without DNA
sampling_method_cd	Probability Sample
sampling_method_cd	Non-Probability Sample
gender_cd	Both
gender_cd	Female
gender_cd	Male
location_person_type_cd	Location Contact
location_person_type_cd	Location Contact Backup
location_person_type_cd	Investigator
person_type_cd	Overall official
person_type_cd	Overall Contact
person_type_cd	Resposible party
person_type_cd	Overall contact backup
role_cd	Study Chair
role_cd	Study Director
role_cd	Principal Investigator
role_cd	Sub-Investigator
location_role_cd	Principal Investigator
location_role_cd	Sub-Investigator
location_role_cd	Study Chair
location_role_cd	Study Director
status_cd	Not yet recruiting
status_cd	Recruiting
status_cd	Enrolling by invitation
status_cd	Active not recruiting
status_cd	Completed
status_cd	Suspended
status_cd	Terminated
status_cd	Withdrawn
completion_date_type_cd	Actual
completion_date_type_cd	Anticipated
primary_completion_date_type_cd	Actual
primary_completion_date_type_cd	Anticipated
design_name_cd	Primary Purpose
design_name_cd	Intervention Model
design_name_cd	Masking
design_name_cd	Allocation
design_name_cd	Endpoint Classification
design_name_cd	Control
design_name_cd	Observational Model
design_name_cd	Time Perspective
design_name_cd	Additional Descriptors
design_value_cd	Psychosocial
design_value_cd	Convenience Sample
design_value_cd	Treatment
design_value_cd	Prevention
design_value_cd	Diagnostic
design_value_cd	Supportive care
design_value_cd	Screening
design_value_cd	Health services research
design_value_cd	Basic science
design_value_cd	Educational/Counseling/Training
design_value_cd	Single Group Assignment
design_value_cd	Parallel Assignment
design_value_cd	Cross-over Assignment
design_value_cd	Factorial Assignment
design_value_cd	Open Label
design_value_cd	Single blind (Participant, Investigator, outcome assessor, Caregiver)
design_value_cd	Double blind (Participant, Investigator, outcome assessor, Caregiver)
design_value_cd	N/A : single study
design_value_cd	Randomized
design_value_cd	Non-randomized
design_value_cd	Random Sample
design_value_cd	N/A
design_value_cd	Safety Study
design_value_cd	Efficacy Study
design_value_cd	Safety/Efficacy Study
design_value_cd	Bio-equivalence Study
design_value_cd	Bio-availability Study
design_value_cd	Pharmacokinetics Study
design_value_cd	Pharmacodynamics Study
design_value_cd	Pharmacokinetics/dynamics Study
design_value_cd	Active Control
design_value_cd	Dose Comparison
design_value_cd	Historical Control
design_value_cd	Placebo Control
design_value_cd	Uncontrolled
design_value_cd	Cohort
design_value_cd	Case-control
design_value_cd	Case-only
design_value_cd	Case-crossover
design_value_cd	Defined Population
design_value_cd	Natural History
design_value_cd	Ecologic or community
design_value_cd	Family-based
design_value_cd	Other
design_value_cd	Prospective
design_value_cd	Retrospective
design_value_cd	Retrospective/Prospective
design_value_cd	Longitudinal
design_value_cd	Cross-sectional
mesh_type_cd	Condition_Browse
mesh_type_cd	Intervention_Browse

## Sheet: Constraints
Constraints
This table includes primary keys, foreign keys, and not null constraints for all tables.
VARIABLE_NAME	TABLE_NAME	CONSTRAINT_NAME	CONSTRAINT_TYPE	REFERENCES_TABLE
address_id	ADDRESSES	PK_ADDRESS	1.PRIMARY KEY
facility_id	ADDRESSES	FK_ADDRESSES_FACILITIES	2.FOREIGN KEY	FACILITIES
nct_id	ADDRESSES	SYS_C0045305	3.NOT NULL CONSTRAINT
facility_id	ADDRESSES	SYS_C0045304	3.NOT NULL CONSTRAINT
address_id	ADDRESSES	SYS_C0045303	3.NOT NULL CONSTRAINT
arm_group_id	ARM_GROUPS	PK_ARM_GROUP	1.PRIMARY KEY
nct_id	ARM_GROUPS	FK_ARM_GROUPS_CLINICAL_STUDY	2.FOREIGN KEY	CLINICAL_STUDY
nct_id	ARM_GROUPS	SYS_C0045308	3.NOT NULL CONSTRAINT
arm_group_id	ARM_GROUPS	SYS_C0045307	3.NOT NULL CONSTRAINT
authority_id	AUTHORITIES	PK_AUTHORITY	1.PRIMARY KEY
nct_id	AUTHORITIES	FK_AUTHORITIES_CLINICAL_STUDY	2.FOREIGN KEY	CLINICAL_STUDY
nct_id	AUTHORITIES	SYS_C0045311	3.NOT NULL CONSTRAINT
authority_id	AUTHORITIES	SYS_C0045310	3.NOT NULL CONSTRAINT
nct_id	CLINICAL_STUDY	PK_CLINICAL_STUDY	1.PRIMARY KEY
nct_id	CLINICAL_STUDY	SYS_C0045313	3.NOT NULL CONSTRAINT
condition_id	CONDITIONS	PK_CONDITION	1.PRIMARY KEY
nct_id	CONDITIONS	FK_CONDITIONS_CLINICAL_STUDY	2.FOREIGN KEY	CLINICAL_STUDY
nct_id	CONDITIONS	SYS_C0045316	3.NOT NULL CONSTRAINT
condition_id	CONDITIONS	SYS_C0045315	3.NOT NULL CONSTRAINT
mesh_condition_id	CONDITION_BROWSE	PK_CONDITION_BROWSE	1.PRIMARY KEY
nct_id	CONDITION_BROWSE	SYS_C0045319	3.NOT NULL CONSTRAINT
mesh_condition_id	CONDITION_BROWSE	SYS_C0045318	3.NOT NULL CONSTRAINT
design_id	DESIGNS	PK_DESIGNS	1.PRIMARY KEY
nct_id	DESIGNS	FK_DESIGNS_CLINICAL_STUDY	2.FOREIGN KEY	CLINICAL_STUDY
nct_id	DESIGNS	SYS_C0045324	3.NOT NULL CONSTRAINT
design_id	DESIGNS	SYS_C0045323	3.NOT NULL CONSTRAINT
enum_id	ENUMERATIONS	PK_ENUMERATIONS	1.PRIMARY KEY
codelist_name	ENUMERATIONS	SYS_C0045327	3.NOT NULL CONSTRAINT
enum_id	ENUMERATIONS	SYS_C0045326	3.NOT NULL CONSTRAINT
facility_id	FACILITIES	PK_FACILITY	1.PRIMARY KEY
location_id	FACILITIES	FK_FACILITIES_LOCATIONS	2.FOREIGN KEY	LOCATIONS
location_id	FACILITIES	SYS_C0045330	3.NOT NULL CONSTRAINT
nct_id	FACILITIES	SYS_C0045331	3.NOT NULL CONSTRAINT
facility_id	FACILITIES	SYS_C0045329	3.NOT NULL CONSTRAINT
name	INPUT_XML_FILENAMES	INPUT_XML_FILENAMES_PK	1.PRIMARY KEY
filename	INPUT_XML_FILES	INPUT_XML_FILES_PK	1.PRIMARY KEY
intervention_id	INTERVENTIONS	PK_INTERVENTION	1.PRIMARY KEY
nct_id	INTERVENTIONS	FK_INTERVENTION_CLINICAL_STUDY	2.FOREIGN KEY	CLINICAL_STUDY
nct_id	INTERVENTIONS	SYS_C0045336	3.NOT NULL CONSTRAINT
intervention_id	INTERVENTIONS	SYS_C0045335	3.NOT NULL CONSTRAINT
int_arm_group_id	INTERVENTION_ARM_GROUPS	PK_INTERVENTION_ARM_GROUP	1.PRIMARY KEY
intervention_id	INTERVENTION_ARM_GROUPS	FK_INTERVENTION__INTERV1	2.FOREIGN KEY	INTERVENTIONS
int_arm_group_id	INTERVENTION_ARM_GROUPS	SYS_C0045338	3.NOT NULL CONSTRAINT
nct_id	INTERVENTION_ARM_GROUPS	SYS_C0045339	3.NOT NULL CONSTRAINT
mesh_intervention_id	INTERVENTION_BROWSE	PK_INTERVENTION_BROWSE	1.PRIMARY KEY
mesh_intervention_id	INTERVENTION_BROWSE	SYS_C0045341	3.NOT NULL CONSTRAINT
nct_id	INTERVENTION_BROWSE	SYS_C0045342	3.NOT NULL CONSTRAINT
int_other_name_id	INTERVENTION_OTHER_NAMES	PK_INTERVENTION_OTHER_NAME	1.PRIMARY KEY
nct_id	INTERVENTION_OTHER_NAMES	SYS_C0045345	3.NOT NULL CONSTRAINT
int_other_name_id	INTERVENTION_OTHER_NAMES	SYS_C0045344	3.NOT NULL CONSTRAINT
keyword_id	KEYWORDS	PK_KEYWORDS	1.PRIMARY KEY
nct_id	KEYWORDS	FK_KEYWORDS_CLINICAL_STUDY	2.FOREIGN KEY	CLINICAL_STUDY
nct_id	KEYWORDS	SYS_C0045348	3.NOT NULL CONSTRAINT
keyword_id	KEYWORDS	SYS_C0045347	3.NOT NULL CONSTRAINT
link_id	LINKS	PK_LINKS	1.PRIMARY KEY
nct_id	LINKS	FK_LINKS_CLINICAL_STUDY	2.FOREIGN KEY	CLINICAL_STUDY
link_id	LINKS	SYS_C0045350	3.NOT NULL CONSTRAINT
nct_id	LINKS	SYS_C0045351	3.NOT NULL CONSTRAINT
location_id	LOCATIONS	PK_LOCATION	1.PRIMARY KEY
nct_id	LOCATIONS	FK_LOCATIONS_CLINICAL_STUDY	2.FOREIGN KEY	CLINICAL_STUDY
location_id	LOCATIONS	SYS_C0045353	3.NOT NULL CONSTRAINT
nct_id	LOCATIONS	SYS_C0045354	3.NOT NULL CONSTRAINT
location_id	LOCATION_CONTACTS	FK_LOCATION_CONTACTS_LOCATIONS	2.FOREIGN KEY	LOCATIONS
nct_id	LOCATION_CONTACTS	SYS_C0045356	3.NOT NULL CONSTRAINT
mesh_tree_id	MESH_TREES	PK_MESH_TREES	1.PRIMARY KEY
nct_id	MESH_TREES	FK_MESH_TREES_CLINICAL_STUDY	2.FOREIGN KEY	CLINICAL_STUDY
nct_id	MESH_TREES	SYS_C0045358	3.NOT NULL CONSTRAINT
mesh_tree_id	MESH_TREES	SYS_C0045357	3.NOT NULL CONSTRAINT
mesh_id	MESH_TREES_RAW	PK_MESH_TREES_RAW	1.PRIMARY KEY
mesh_id	MESH_TREES_RAW	SYS_C0045360	3.NOT NULL CONSTRAINT
outcome_id	OUTCOMES	PK_OUTCOME	1.PRIMARY KEY
nct_id	OUTCOMES	FK_OUTCOMES_CLINICAL_STUDY	2.FOREIGN KEY	CLINICAL_STUDY
nct_id	OUTCOMES	SYS_C0045363	3.NOT NULL CONSTRAINT
outcome_id	OUTCOMES	SYS_C0045362	3.NOT NULL CONSTRAINT
person_id	PERSONS	PK_CONTACT_LOCATION	1.PRIMARY KEY
nct_id	PERSONS	FK_PERSONS_CLINICAL_STUDY	2.FOREIGN KEY	CLINICAL_STUDY
nct_id	PERSONS	SYS_C0045366	3.NOT NULL CONSTRAINT
person_id	PERSONS	SYS_C0045365	3.NOT NULL CONSTRAINT
reference_id	REFERENCES	PK_REFERENCE	1.PRIMARY KEY
nct_id	REFERENCES	FK_REFERENCES_CLINICAL_STUDY	2.FOREIGN KEY	CLINICAL_STUDY
nct_id	REFERENCES	SYS_C0045369	3.NOT NULL CONSTRAINT
reference_id	REFERENCES	SYS_C0045368	3.NOT NULL CONSTRAINT
sec_id	SECONDARY_IDS	PK_SECONDARY_IDS	1.PRIMARY KEY
nct_id	SECONDARY_IDS	FK_SECONDARY_ID_CLINICAL_STUDY	2.FOREIGN KEY	CLINICAL_STUDY
sec_id	SECONDARY_IDS	SYS_C0045371	3.NOT NULL CONSTRAINT
nct_id	SECONDARY_IDS	SYS_C0045372	3.NOT NULL CONSTRAINT
sponsor_id	SPONSORS	PK_SPONSORS	1.PRIMARY KEY
nct_id	SPONSORS	FK_SPONSORS_CLINICAL_STUDY	2.FOREIGN KEY	CLINICAL_STUDY
nct_id	SPONSORS	SYS_C0045375	3.NOT NULL CONSTRAINT
sponsor_id	SPONSORS	SYS_C0045374	3.NOT NULL CONSTRAINT
variable_id	VARIABLES	PK_VARIABLES	1.PRIMARY KEY
variable_id	VARIABLES	SYS_C0045381	3.NOT NULL CONSTRAINT

## Sheet: Record Counts
Record Counts
Total number of records in each table. It could be helpful to do a match with these numbers after importing text files into a database.
TABLE_NAME	RECORD_COUNT
ADDRESSES	883651
ARM_GROUPS	113404
AUTHORITIES	129189
CLINICAL_STUDY	96346
CONDITIONS	149586
CONDITION_BROWSE	190569
DESIGNS	419943
FACILITIES	883651
INTERVENTIONS	166022
INTERVENTION_ARM_GROUPS	144812
INTERVENTION_BROWSE	109316
INTERVENTION_OTHER_NAMES	57636
KEYWORDS	361377
LINKS	35065
LOCATIONS	883651
LOCATION_CONTACTS	209623
MESH_TREES	2674460
MESH_TREES_RAW	50956
OUTCOMES	295032
PERSONS	216934
REFERENCES	87167
SECONDARY_IDS	47483
SPONSORS	145232

## Sheet: Comprehensive Change_History
Comprehensive Change History of Data Element Definitions from ClinicalTrials.gov										Comprehensive Change History of Data Element Definitions from ClinicalTrials.gov													Comprehensive Change History of Data Element Definitions from ClinicalTrials.gov													Comprehensive Change History of Data Element Definitions from ClinicalTrials.gov													Comprehensive Change History of Data Element Definitions from ClinicalTrials.gov
This document tracks changes made to ‘ClinicalTrials.gov Protocol Data Element Definitions’ released by NLM from December 2000 until May 2010. Two columns are added for each ClinicalTrials.gov Definitions release. The first column displays definitions corresponding to a given variable; the second displays the changes compared to the previous release. Columns are ordered reverse chronologically fr…										This document tracks changes made to ‘ClinicalTrials.gov Protocol Data Element Definitions’ released by NLM from December 2000 until May 2010. Two columns are added for each ClinicalTrials.gov Definitions release. The first column displays definitions corresponding to a given variable; the second displays the changes compared to the previous release. Columns are ordered reverse chronologically fr…													This document tracks changes made to ‘ClinicalTrials.gov Protocol Data Element Definitions’ released by NLM from December 2000 until May 2010. Two columns are added for each ClinicalTrials.gov Definitions release. The first column displays definitions corresponding to a given variable; the second displays the changes compared to the previous release. Columns are ordered reverse chronologically fr…													This document tracks changes made to ‘ClinicalTrials.gov Protocol Data Element Definitions’ released by NLM from December 2000 until May 2010. Two columns are added for each ClinicalTrials.gov Definitions release. The first column displays definitions corresponding to a given variable; the second displays the changes compared to the previous release. Columns are ordered reverse chronologically fr…													This document tracks changes made to ‘ClinicalTrials.gov Protocol Data Element Definitions’ released by NLM from December 2000 until May 2010. Two columns are added for each ClinicalTrials.gov Definitions release. The first column displays definitions corresponding to a given variable; the second displays the changes compared to the previous release. Columns are ordered reverse chronologically fr…
Retired Variables are highlighted in green. These are previously used variables which are no longer collected. Historical values not available in current download.										Retired Variables are highlighted in green. These are previously used variables which are no longer collected.													Retired Variables are highlighted in green. These are previously used variables which are no longer collected.													Retired Variables are highlighted in green. These are previously used variables which are no longer collected.													Retired Variables are highlighted in green. These are previously used variables which are no longer collected.
Non-Public Items are highlighted in blue. These are collected variables which are not part of the public dataset.										Non-Public Items are highlighted in blue. These are collected variables which are not part of the public dataset.													Non-Public Items are highlighted in blue. These are collected variables which are not part of the public dataset.													Non-Public Items are highlighted in blue. These are collected variables which are not part of the public dataset.													Non-Public Items are highlighted in blue. These are collected variables which are not part of the public dataset.
Variable_Name	Codelist_Name	Table_Name	Retired_variable_label	NLM_Required	FDAAA_Required	Latest_Intro_date_Variable	Date_Discontinued_Variable	Non_Pub_Latest_Intro_Date_Variable	Definitions-2010-05 Current Release	Change made for 2010-05	Definitions-2010-02	Change made for 2010-02	Definitions-2008-08	Change made for 2008-08	Definitions-2008-02	Change made for 2008-02	Definitions-2007-12	Change made for 2007-12	Definitions-2007-10	Change made for 2007-10	Definitions-2007-09	Change made for 2007-09	Definitions-2007-08	Change made for 2007-08	Definitions-2007-07	Change made for 2007-07	Definitions-2007-04	Change made for 2007-04	Definitions-2007-02	Change made for 2007-02	Definitions-2006-09	Change made for 2006-09	Definitions-2006-07	Change made for 2006-07	Definitions-2005-08	Change made for 2005-08	Definitions-2005-07	Change made for 2005-07	Definitions-2004-10	Change made for 2004-10	Definitions-2004-09	Change made for 2004-09	Definitions-2002-08	Change made for 2002-08	Definitions-2002-04	Change made for 2002-04	Definitions-2001-12	Change made for 2001-12	Definitions-2001-10
address_id		ADDRESSES		No	No	N/A
city		ADDRESSES		Yes	Maybe	2000-12			City * (FDAAA)								City
country		ADDRESSES		Yes	Maybe	2000-12			Country * (FDAAA)								Country
facility_id		ADDRESSES		No	No	N/A
nct_id		ADDRESSES		No	No	2000-12
state		ADDRESSES		Yes	Maybe	2000-12			State/Province * (FDAAA)								State/Province
zip		ADDRESSES		No	No	2000-12			Postal Code
arm_group_id		ARM_GROUPS		No	No	N/A
arm_group_label		ARM_GROUPS		Yes	Maybe	2007-07			For interventional studies specify the arms, corresponding to Number of Arms specified under Study Design (for single-arm studies, the following data elements are optional). Arm Label * (FDAAA) - the short name used to identify the arm. (Limit: 62 characters) Examples: • Metformin • Lifestyle counseling • Sugar pill For observational studies specify the predefined participant groups (cohorts) to …	under Arm instruction, inserted "corresponding to Number of Arms specified under Study Design (for single-arm studies, the following data elements are optional)." under Arm Label, inserted "(Limit: 62 characters)" under Group instruction, inserted ", corresponding to Number of Groups specified under Study Design (for single-group studies, the following data elements are optional)." under Group La…			For interventional studies specify the arms: Arm Label * (FDAAA) - the short name used to identify the arm. Examples: • Metformin • Lifestyle counseling • Sugar pill For observational studies specify the predefined participant groups (cohorts) to be studied. Do not use this section to specify strata (Detailed Design can be used for that purpose, if desired). Group/Cohort Label * - the short name …	changed "Arm Number or Label" to "Arm Label" under Arm Label, changed "the number, letter or name" to "the short name" under Arm Label Examples, changed "A, 2, III" to "• Metformin • Lifestyle counseling • Sugar pill" changed "Group/Cohort Number or Label" to "Group/Cohort Label" under Group/Cohort Label, changed "the number, letter or name" to "the short name" under Group/Cohort Label Examples, …					For interventional studies specify the arms: Arm Number or Label - the number, letter or name used to identify the arm. Examples: A, 2, III For observational studies specify the predefined participant groups (cohorts) to be studied. Do not use this section to specify strata (Detailed Design can be used for that purpose, if desired). Group/Cohort Number or Label - the number, letter or name used t…	changed "For observational studies specify the groups to be studied: Group Number or Label - the number, letter or name used to identify the group. Examples: A, 2, III" to "For observational studies specify the predefined participant groups (cohorts) to be studied. Do not use this section to specify strata (Detailed Design can be used for that purpose, if desired). Group/Cohort Number or Label - …					For interventional studies specify the arms: Arm Number or Label - the number, letter or name used to identify the arm. Examples: A, 2, III For observational studies specify the groups to be studied: Group Number or Label - the number, letter or name used to identify the group. Examples: A, 2, III	inserted new item "For interventional studies specify the arms: Arm Number or Label - the number, letter or name used to identify the arm. Examples: A, 2, III For observational studies specify the groups to be studied: Group Number or Label - the number, letter or name used to identify the group. Examples: A, 2, III"
arm_group_type	arm_group_type_id	ARM_GROUPS		Yes	Maybe	2007-07			Arm Type * (FDAAA) - select one Experimental Active Comparator Placebo Comparator Sham Comparator No intervention Other																Arm Type - select one • Experimental • Active Comparator • Placebo Comparator • Sham Comparator • No intervention • Other Group Type - select one • Case • Control • Treatment Comparison • Exposure Comparison • Other	inserted new item "Arm Type - select one • Experimental • Active Comparator • Placebo Comparator • Sham Comparator • No intervention • Other Group Type - select one • Case • Control • Treatment Comparison • Exposure Comparison • Other"
description		ARM_GROUPS		No	Maybe	2007-07			Arm Description (FDAAA) - brief description of the arm. This element may not be necessary if the associated intervention descriptions contain sufficient information to describe the arm. (Limit: 999 characters) Group/Cohort Description Definition: Explanation of the nature of the study group (e.g., those with a condition and those without a condition; those with an exposure and those without an ex…	under Arm Description, inserted "(Limit: 999 characters)" under Group/Cohort Description, inserted "(Limit: 1000 characters)"							Arm Description - brief description of the arm. This element may not be necessary if the associated intervention descriptions contain sufficient information to describe the arm. Group/Cohort Description Definition: Explanation of the nature of the study group (e.g., those with a condition and those without a condition; those with an exposure and those without an exposure). Note that the overall s…	under Arm Description, changed "may be omitted" to "may not be necessary"	Arm Description - brief description of the arm. This element may be omitted if the associated intervention descriptions contain sufficient information to describe the arm. Group/Cohort Description Definition: Explanation of the nature of the study group (e.g., those with a condition and those without a condition; those with an exposure and those without an exposure). Note that the overall study p…	changed "Group Description - brief description of the subject group" to "Group/Cohort Description Definition: Explanation of the nature of the study group (e.g., those with a condition and those without a condition; those with an exposure and those without an exposure). Note that the overall study population should be described under Eligibility."					Arm Description - brief description of the arm. This element may be omitted if the associated intervention descriptions contain sufficient information to describe the arm. Group Description - brief description of the subject group	inserted new item "Arm Description - brief description of the arm. This element may be omitted if the associated intervention descriptions contain sufficient information to describe the arm. Group Description - brief description of the subject group"
nct_id		ARM_GROUPS		No	No	N/A
authority		AUTHORITIES		Yes	No	2004-10			Oversight authority information is displayed on ClinicalTrials.gov. For IND/IDE protocols, Oversight Authority is filled in automatically with "United States: Food and Drug Administration." Oversight Authorities * Definition: The name of each national or international health organization with authority over the protocol. Use the following format for each authority: country: organization name Exam…						Oversight authority information is displayed on ClinicalTrials.gov. For IND/IDE protocols, Oversight Authority is filled in automatically with "United States: Food and Drug Administration." Oversight Authorities * Definition: The name of each national or international health organization with authority over the protocol. Use the following format for each authority: country: organization name Exam…	inserted "For IND/IDE protocols, Oversight Authority is filled in automatically with "United States: Food and Drug Administration.""																	Oversight authority information is displayed on ClinicalTrials.gov. Oversight Authorities * Definition: The name of each national or international health organization with authority over the protocol. Use the following format for each authority: country: organization name Examples: United States: Institutional Review Board United States: Food and Drug Administration Germany: Federal Institute for…	under Examples, inserted "United States: Institutional Review Board"			Oversight authority information is displayed on ClinicalTrials.gov. Oversight Authorities Definition: The name of each national or international health organization with authority over the protocol. Use the following format for each authority: country: organization name Example: United States: Food and Drug Administration Germany: Federal Institute for Drugs and Medical Devices Australia: Therape…	inserted "Oversight authority information is displayed on ClinicalTrials.gov."	Oversight Authorities Definition: The name of each national or international health organization with authority over the protocol. Use the following format for each authority: country: organization name Example: United States: Food and Drug Administration Germany: Federal Institute for Drugs and Medical Devices Australia: Therapeutic Goods Administration	inserted new item "Oversight Authorities Definition: The name of each national or international health organization with authority over the protocol. Use the following format for each authority: country: organization name Example: United States: Food and Drug Administration Germany: Federal Institute for Drugs and Medical Devices Australia: Therapeutic Goods Administration"
authority_id		AUTHORITIES		No	No	N/A
nct_id		AUTHORITIES		No	No	N/A
acronym		CLINICAL_STUDY		No	No	2007-02			Acronym Definition: Acronym or initials used to identify this study, if applicable. Enter only the acronym. If supplied, the acronym is automatically displayed in parentheses following the brief title. (Limit: 14 characters) Example: Brief Title: Women's Health Initiative Acronym: WHI Displayed on ClinicalTrials.gov as: Women's Health Initiative (WHI)	inserted "(Limit: 14 characters)"																			Acronym Definition: Acronym or initials used to identify this study, if applicable. Enter only the acronym. If supplied, the acronym is automatically displayed in parentheses following the brief title. Example: Brief Title: Women's Health Initiative Acronym: WHI Displayed on ClinicalTrials.gov as: Women's Health Initiative (WHI)	inserted new item "Acronym Definition: Acronym or initials used to identify this study, if applicable. Enter only the acronym. If supplied, the acronym is automatically displayed in parentheses following the brief title. Example: Brief Title: Women's Health Initiative Acronym: WHI Displayed on ClinicalTrials.gov as: Women's Health Initiative (WHI)"
biospec_descr		CLINICAL_STUDY		No	No	2007-10			Biospecimen Description Definition: Specify all types of biospecimens to be retained (e.g., whole blood, serum, white cells, urine, tissue). (Limit: 1000 characters)	inserted "(Limit: 1000 characters) "									Biospecimen Description Definition: Specify all types of biospecimens to be retained (e.g., whole blood, serum, white cells, urine, tissue).	inserted new item "Biospecimen Description Definition: Specify all types of biospecimens to be retained (e.g., whole blood, serum, white cells, urine, tissue)."
biospec_retention	biospec_retention_id	CLINICAL_STUDY		No	No	2007-10			Biospecimen Retention - select one • None Retained - no samples retained • Samples With DNA - samples retained, with potential for extraction of DNA from at least one of the types of samples retained (e.g., frozen tissue, whole blood) • Samples Without DNA - samples retained, with no potential for DNA extraction from any retained samples (e.g., fixed tissue, plasma)										Biospecimen Retention - select one • None Retained - no samples retained • Samples With DNA - samples retained, with potential for extraction of DNA from at least one of the types of samples retained (e.g., frozen tissue, whole blood) • Samples Without DNA - samples retained, with no potential for DNA extraction from any retained samples (e.g., fixed tissue, plasma)	inserted new item "Biospecimen Retention - select one • None Retained - no samples retained • Samples With DNA - samples retained, with potential for extraction of DNA from at least one of the types of samples retained (e.g., frozen tissue, whole blood) • Samples Without DNA - samples retained, with no potential for DNA extraction from any retained samples (e.g., fixed tissue, plasma)"
brief_summary		CLINICAL_STUDY		Yes	Yes	2000-12			Brief Summary * FDAAA Definition: Short description of the protocol intended for the lay public. Include a brief statement of the study hypothesis. (Limit: 5000 characters) Example: The purpose of this study is to determine whether prednisone, methotrexate, and cyclophosphamide are effective in the treatment of rapidly progressive hearing loss in both ears due to autoimmune inner ear disease (AIE…	inserted "(Limit: 5000 characters)"							Brief Summary Definition: Short description of the protocol intended for the lay public. Include a brief statement of the study hypothesis. Example: The purpose of this study is to determine whether prednisone, methotrexate, and cyclophosphamide are effective in the treatment of rapidly progressive hearing loss in both ears due to autoimmune inner ear disease (AIED).	changed "description of the primary purpose of the protocol" to "description of the protocol"																			Study Description Brief Summary Definition: Short description of the primary purpose of the protocol intended for the lay public. Include a brief statement of the study hypothesis. Example: The purpose of this study is to determine whether prednisone, methotrexate, and cyclophosphamide are effective in the treatment of rapidly progressive hearing loss in both ears due to autoimmune inner ear dise…	inserted "Include a brief statement of the study hypothesis. "									Study Description Brief Summary Submission: Required Definition: Short description of the primary purpose of the protocol intended for the lay public. Example: The purpose of this study is to determine whether prednisone, methotrexate, and cyclophosphamide are effective in the treatment of rapidly progressive hearing loss in both ears due to autoimmune inner ear disease (AIED).	changed "description of the purpose" to "description of the primary purpose" changed "sensorineural hearing loss in both ears" to "hearing loss in both ears due to autoimmune inner ear disease (AIED)" deleted "This condition is called autoimmune inner ear disease (AIED) because it is thought that the hearing loss is triggered by an autoimmune process. Treatment attempts to suppress or control thi…
brief_title		CLINICAL_STUDY		Yes	Yes	2000-12			Brief Title * FDAAA Definition: Protocol title intended for the lay public. (Limit: 300 characters) Example: Safety Study of Recombinant Vaccinia Virus Vaccine to Treat Prostate Cancer	inserted "(Limit: 300 characters)"
completion_date		CLINICAL_STUDY		No	No	2000-12			Study Completion Date Definition: Final date on which data was (or is expected to be) collected.								Study Completion Date Definition: Final date on which data was (or is expected to be) collected.	changed "Completion Date" to "Study Completion Date"			Completion Date Definition: Final date on which data was (or is expected to be) collected.	changed "Last Follow-Up Date Definition: Date that the final subject was (or is expected to be) examined or treated. " to "Completion Date Definition: Final date on which data was (or is expected to be) collected. "			Last Follow-Up Date Definition: Date that the final subject was (or is expected to be) examined or treated.	changed "Date that last subject was examined or treated" to "Date that the final subject was (or is expected to be) examined or treated"	Last Follow-Up Date Definition: Date that last subject was examined or treated.	changed "Last Follow-Up Date Definition: Date that follow-up with all study participants is complete." to "Last Follow-Up Date Definition: Date that last subject was examined or treated. "													Study Completion Date Definition: Expected or actual date that analysis is concluded for the protocol.	changed "Completion Date" to "Study Completion Date" deleted "Submission: Optional" changed "actual completion date of the protocol" to "actual date that analysis is concluded for the protocol" NOTE: Moved the contents of Last Follow-Up Date to Study Completion Date as it is called as of 2010-05 release.
completion_date_type	completion_date_type_id	CLINICAL_STUDY		No	No	2007-04			Use the Type menu (Anticipated/Actual) as described above. [A "Type" menu is also included, with options Anticipated and Actual. For active studies, set Type to Anticipated and specify the expected completion date, updating the date as needed over the course of the study. Upon study completion, change Type to Actual and update the date if necessary. ]												A "Type" menu is also included, with options Anticipated and Actual. For active studies, set Type to Anticipated and specify the expected completion date, updating the date as needed over the course of the study. Upon study completion, change Type to Actual and update the date if necessary.	changed "A "Type" menu is also included, with options Anticipated and Actual. For active studies, set Type to Anticipated and specify the expected last follow-up date" to "A "Type" menu is also included, with options Anticipated and Actual. For active studies, set Type to Anticipated and specify the expected completion date"					A "Type" menu is also included, with options Anticipated and Actual. For active studies, set Type to Anticipated and specify the expected last follow-up date, updating the date as needed over the course of the study. Upon study completion, change Type to Actual and update the date if necessary.	inserted new item: "A "Type" menu is also included, with options Anticipated and Actual. For active studies, set Type to Anticipated and specify the expected last follow-up date, updating the date as needed over the course of the study. Upon study completion, change Type to Actual and update the date if necessary."
criteria		CLINICAL_STUDY		Yes	Yes	2000-12			Eligibility Criteria * FDAAA Definition: Summary criteria for participant selection. The preferred format includes lists of inclusion and exclusion criteria as shown below. (Limit: 15,000 characters) Example: Inclusion Criteria: - Clinical diagnosis of Alzheimer's Disease - Must be able to swallow tablets Exclusion Criteria: - Insulin dependent diabetes - Thyroid disease	inserted "(Limit: 15,000 characters)"													Eligibility Criteria * Definition: Summary criteria for participant selection. The preferred format includes lists of inclusion and exclusion criteria as shown below. Example: Inclusion Criteria: - Clinical diagnosis of Alzheimer's Disease - Must be able to swallow tablets Exclusion Criteria: - Insulin dependent diabetes - Thyroid disease	inserted ". The preferred format includes lists of inclusion and exclusion criteria as shown below."																							Eligibility Criteria Submission: Required Definition: Summary criteria for participant selection Example: Inclusion Criteria: • Clinical diagnosis of Alzheimer's Disease • Must be able to swallow tablets Exclusion Criteria: • Insulin dependent diabetes • Thyroid disease	changed Example from "Patients with amblyopia due to strabismus or anisometropia. Visual acuity in the amblyopic eye must be between 20/50 and 20/100, visual acuity in the sound eye of 20/40 or better, and there must be at least 3 lines of acuity difference between the two eyes. Patients must have had no more than two months of amblyopia therapy in the past two years." to "Inclusion Criteria: • C…
detailed_description		CLINICAL_STUDY		No	No	2000-12			Detailed Description Definition: Extended description of the protocol, including more technical information (as compared to the Brief Summary) if desired. Do not include the entire protocol; do not duplicate information recorded in other data elements, such as eligibility criteria or outcome measures. (Limit: 32,000 characters) Example: Sudden out-of-hospital cardiac arrest (OOH-CA) remains a sig…	inserted "(Limit: 32,000 characters)"													Detailed Description Definition: Extended description of the protocol, including more technical information (as compared to the Brief Summary) if desired. Do not include the entire protocol; do not duplicate information recorded in other data elements, such as eligibility criteria or outcome measures. Example: Sudden out-of-hospital cardiac arrest (OOH-CA) remains a significant cause of death, in…	changed Definition from "Extended description of the protocol, including information not already contained in other fields, such as comparison(s) studied." to "Extended description of the protocol, including more technical information (as compared to the Brief Summary) if desired. Do not include the entire protocol; do not duplicate information recorded in other data elements, such as eligibility…													Detailed Description Definition: Extended description of the protocol, including information not already contained in other fields, such as comparison(s) studied. Example: Sudden out-of-hospital cardiac arrest (OOH-CA) remains a significant cause of death, in spite of recent declines in overall mortality from cardiovascular disease. Existing methods of emergency resuscitation are inadequate due t…	under definition, deleted "hypothesis and" deleted "Study Hypothesis: Public Access Defibrillation (PAD) would significantly increase survival in out-of-hospital cardiac arrest by reducing the time interval from collapse to defibrillation."	Detailed Description Definition: Extended description of the protocol, including information not already contained in other fields, such as hypothesis and comparison(s) studied. Example: Sudden out-of-hospital cardiac arrest (OOH-CA) remains a significant cause of death, in spite of recent declines in overall mortality from cardiovascular disease. Existing methods of emergency resuscitation are i…	changed "including information such as methodology and rationale not already contained in other fields" to "including information not already contained in other fields, such as hypothesis and comparison(s) studied." changed Example from "The incidence of a second stroke in patients who have had a first stroke is between 7 and 10 percent per year. Myocardial infarction (heart attack) as a complica…							Detailed Description Submission: Optional Definition: Extended description of the protocol, including information such as methodology and rationale not already contained in other fields. Example: The incidence of a second stroke in patients who have had a first stroke is between 7 and 10 percent per year. Myocardial infarction (heart attack) as a complication of stroke adds to stroke death and di…	changed "Technical" to "Extended" deleted "for health professionals" changed Example from "This is an open label, dose escalation study. Patients in cohorts of 3-6 receive 3 vaccinations with rV-PSA at 4-week intervals (days 1, 29, 57, and 85) in the absence of disease progression or unacceptable toxicity. Response assessment is performed at eight weeks. Patients who discontinue therapy prior to …
download_date		CLINICAL_STUDY		No	No	N/A
download_date_dt		CLINICAL_STUDY		No	No	N/A
enrollment		CLINICAL_STUDY		Yes	Yes	2000-12			Enrollment (Target or Actual Number of Subjects) FDAAA for Enrollment in Interventional Study Design, "*" for Enrollment in Observational Study Design Definition: Number of subjects in the trial.								Enrollment (Target or Actual Number of Subjects) Definition: Number of subjects in the trial.	changed "Enrollment" to "Enrollment (Target or Actual Number of Subjects)"									Enrollment Definition: Number of subjects in the trial.	changed item name from "Target Number of Subjects" to "Enrollment" changed Definition from "Estimated number of participants to be studied" to "Number of subjects in the trial."											Target Number of Subjects Definition: Estimated number of participants to be studied	changed item name from Expected Total Enrollment to Target Number of Subjects
enrollment_type	enrollment_type_id	CLINICAL_STUDY		Yes	Yes	2007-04			FDAAA for Enrollment in Interventional Study Design, "*" for Enrollment in Observational Study Design A "Type" menu is also included, with options Anticipated and Actual. For active studies, set Type to Anticipated and specify the expected enrollment, updating the number as needed over the course of the study. Upon study completion, change Type to Actual and update the enrollment if necessary. FD…																		A "Type" menu is also included, with options Anticipated and Actual. For active studies, set Type to Anticipated and specify the expected enrollment, updating the number as needed over the course of the study. Upon study completion, change Type to Actual and update the enrollment if necessary.	inserted new item: "Enrollment A "Type" menu is also included, with options Anticipated and Actual. For active studies, set Type to Anticipated and specify the expected enrollment, updating the number as needed over the course of the study. Upon study completion, change Type to Actual and update the enrollment if necessary."
firstreceived_date		CLINICAL_STUDY		No	No	N/A			Definition not found
firstreceived_results_date		CLINICAL_STUDY		No	No	N/A			Definition not found
gender	gender_id	CLINICAL_STUDY		Yes	Yes	2000-12			Gender * FDAAA Definition: Physical gender of individuals who may participate in the protocol. Select one. • Both: both female and male participants are being studied • Female: only female participants are being studied • Male: only male participants are being studied
has_dmc	YN	CLINICAL_STUDY		No	No	2007-04			Data Monitoring Committee? Definition: Indicate whether a data monitoring committee has been appointed for this study. The data monitoring committee (board) is a group of independent scientists who are appointed to monitor the safety and scientific integrity of a human research intervention, and to make recommendations to the sponsor regarding the stopping of the trial for efficacy, for harms or …																		Data Monitoring Committee? Definition: Indicate whether a data monitoring committee has been appointed for this study. The data monitoring committee (board) is a group of independent scientists who are appointed to monitor the safety and scientific integrity of a human research intervention, and to make recommendations to the sponsor regarding the stopping of the trial for efficacy, for harms or …	inserted new item "Data Monitoring Committee? Definition: Indicate whether a data monitoring committee has been appointed for this study. The data monitoring committee (board) is a group of independent scientists who are appointed to monitor the safety and scientific integrity of a human research intervention, and to make recommendations to the sponsor regarding the stopping of the trial for effi…
has_expanded_access	YN	CLINICAL_STUDY		No	Yes	2007-02			Has Expanded Access? FDAAA Definition: Indicate whether any non-protocol access is to be provided for the investigational drug or device. If so, an Expanded Access record should also be created for this IND/IDE. Expanded Access Record FDAAA Definition: The ClinicalTrials.gov identifier (NCT number) for the Expanded Access record associated with this study, specified if and only if "Yes" is specif…	inserted "Expanded Access Record FDAAA Definition: The ClinicalTrials.gov identifier (NCT number) for the Expanded Access record associated with this study, specified if and only if "Yes" is specified for Has Expanded Access."																			Has Expanded Access? Definition: Indicate whether any non-protocol access is to be provided for the investigational drug or device. If so, an Expanded Access record should also be created for this IND/IDE.	inserted new item "Has Expanded Access? Definition: Indicate whether any non-protocol access is to be provided for the investigational drug or device. If so, an Expanded Access record should also be created for this IND/IDE."
healthy_volunteers	YN	CLINICAL_STUDY		No	Yes	2000-12			Accepts Healthy Volunteers? FDAAA Definition: Indicate if persons who have not had the condition(s) being studied or otherwise related conditions or symptoms, as specified in the eligibility requirements, may participate in the study. Select Yes/No.																		Accepts Healthy Volunteers? Definition: Indicate if persons who have not had the condition(s) being studied or otherwise related conditions or symptoms, as specified in the eligibility requirements, may participate in the study. Select Yes/No.	deleted "Acceptable Participants"
is_fda_regulated	YN	CLINICAL_STUDY		No	Maybe	2007-12			FDA Regulated Intervention? (FDAAA) Definition: Indicate whether this trial includes an intervention subject to US Food and Drug Administration regulation under section 351 of the Public Health Service Act or any of the following sections of the Federal Food, Drug and Cosmetic Act: 505, 510(k), 515, 520(m), and 522. Select Yes/No.								FDA Regulated Intervention? Definition: Indicate whether this trial includes an intervention subject to US Food and Drug Administration regulation under section 351 of the Public Health Service Act or any of the following sections of the Federal Food, Drug and Cosmetic Act: 505, 510(k), 515, 520(m), and 522. Select Yes/No.	inserted new item "FDA Regulated Intervention? Definition: Indicate whether this trial includes an intervention subject to US Food and Drug Administration regulation under section 351 of the Public Health Service Act or any of the following sections of the Federal Food, Drug and Cosmetic Act: 505, 510(k), 515, 520(m), and 522. Select Yes/No."
is_section_801	YN	CLINICAL_STUDY		No	Maybe	2007-12			Section 801 Clinical Trial? (FDAAA) Definition: If this trial includes an FDA regulated intervention, indicate whether this is an "applicable clinical trial" as defined in US Public Law 110-85, Title VIII, Section 801. Briefly, applicable drug trials include controlled clinical investigations, other than Phase I investigations, of a drug or biologic subject to US FDA regulation. Applicable device…								Section 801 Clinical Trial? Definition: If this trial includes an FDA regulated intervention, indicate whether this is an "applicable clinical trial" as defined in US Public Law 110-85, Title VIII, Section 801. Briefly, applicable drug trials include controlled clinical investigations, other than Phase I investigations, of a drug or biologic subject to US FDA regulation. Applicable device clinica…	inserted new item "Section 801 Clinical Trial? Definition: If this trial includes an FDA regulated intervention, indicate whether this is an "applicable clinical trial" as defined in US Public Law 110-85, Title VIII, Section 801. Briefly, applicable drug trials include controlled clinical investigations, other than Phase I investigations, of a drug or biologic subject to US FDA regulation. Applic…
lastchanged_date		CLINICAL_STUDY		No	No	N/A			Definition not found
maximum_age		CLINICAL_STUDY		Yes	Yes	2000-12			Age Limits * FDAAA Maximum Age Definition: Maximum age of participants. Provide a number and a unit of time (years, months, weeks, days, hours or minutes). Select "N/A (No limit)" if no maximum age is indicated.
minimum_age		CLINICAL_STUDY		Yes	Yes	2000-12			Age Limits * FDAAA Minimum Age Definition: Minimum age of participants. Provide a number and select a unit of time (years, months, weeks, days, hours or minutes). Select "N/A (No limit)" if no minimum age is indicated.
nct_alias		CLINICAL_STUDY		No	No	N/A			Definition not found
nct_id		CLINICAL_STUDY		No	No	N/A			Definition not found
number_of_arms		CLINICAL_STUDY		No	Maybe	2007-04			Number of Arms (FDAAA) Definition: Number of intervention groups (enter 1 for single-arm study).																		Number of Arms Definition: Number of intervention groups (enter 1 for single-arm study).	inserted new item: "Number of Arms Definition: Number of intervention groups (enter 1 for single-arm study)."
number_of_groups		CLINICAL_STUDY		Yes	No	2000-12			Number of Groups/Cohorts * Definition: Number of study groups/cohorts. Enter 1 for a single-group study. Many observational studies have one group/cohort; case control studies typically have two.
official_title		CLINICAL_STUDY		No	No	2000-12			Official Title Definition: Official name of the protocol provided by the study principal investigator or sponsor. Example: Phase 1 Study of Recombinant Vaccinia Virus That Expresses Prostate Specific Antigen in Metastatic Adenocarcinoma of the Prostate (Limit: 600 characters)	inserted "(Limit: 600 characters)"																											Official Title Definition: Official name of the protocol provided by the study principal investigator or sponsor. Example: Phase 1 Study of Recombinant Vaccinia Virus That Expresses Prostate Specific Antigen in Metastatic Adenocarcinoma of the Prostate	changed "the principal investigator or sponsor" to "the study principal investigator or sponsor"											Official Title (if desired) Definition: Official name of the protocol provided by the principal investigator or sponsor. Example: Phase 1 Study of Recombinant Vaccinia Virus That Expresses Prostate Specific Antigen in Metastatic Adenocarcinoma of the Prostate
org_study_id		CLINICAL_STUDY		Yes	Yes	2000-12			Organization's Unique Protocol ID * FDAAA Definition: Unique identification assigned to the protocol by the sponsoring organization, usually an accession number or a variation of a grant number. Multiple studies conducted under the same grant must each have a unique number. Examples: ABT-1233-RV Merck-023 ACTG 021	inserted "(Limit: 30 characters)"							Organization's Unique Protocol ID Definition: Unique identification assigned to the protocol by the sponsoring organization, usually an accession number or a variation of a grant number. Multiple studies conducted under the same grant must each have a unique number. Examples: ABT-1233-RV Merck-023 ACTG 021	deleted "Examples: CC-99-H-0020, R01-123456-1, R01-123456-2" inserted "ABT-1233-RV Merck-023 ACTG 021"
overall_status	overall_status_id	CLINICAL_STUDY		Yes	Yes	2000-12			Overall Recruitment Status * FDAAA [Required when Study Type is "Interventional" or "Observational".] Definition: Overall accrual activity for the protocol. Select one. Not yet recruiting: participants are not yet being recruited Recruiting: participants are currently being recruited Enrolling by invitation: participants are being (or will be) selected from a predetermined population Active, not …	under Overall Recruitment Status, inserted "[Required when Study Type is "Interventional" or "Observational".]"									Overall Recruitment Status * Definition: Overall accrual activity for the protocol. Select one. Not yet recruiting: participants are not yet being recruited Recruiting: participants are currently being recruited Enrolling by invitation: participants are being (or will be) selected from a predetermined population Active, not recruiting: study is ongoing (i.e., patients are being treated or examine…	under Not Yet Recruiting, changed "participants are not yet being recruited or enrolled" to "participants are not yet being recruited" under Recruiting, changed "participants are currently being recruited and enrolled" to "participants are currently being recruited" deleted "• No longer recruiting: participants are no longer being recruited or enrolled" inserted "• Enrolling by invitation: partic…					Overall Recruitment Status * Definition: Overall accrual activity for the protocol. Select one. Not yet recruiting: participants are not yet being recruited or enrolled Recruiting: participants are currently being recruited and enrolled No longer recruiting: participants are no longer being recruited or enrolled Completed: the study has concluded normally; participants are no longer being examine…	under Completed, changed "participants are no longer being examined or treated (i.e., last patient's last visit has occurred)" to ": the study has concluded normally; participants are no longer being examined or treated (i.e., last patient's last visit has occurred)" under Suspended, changed "halted" to "halted prematurely" under Terminated, changed "halted" to "halted prematurely" under Withdraw…	Overall Recruitment Status * Definition: Overall accrual activity for the protocol. Select one. Not yet recruiting: participants are not yet being recruited or enrolled Recruiting: participants are currently being recruited and enrolled No longer recruiting: participants are no longer being recruited or enrolled Completed: participants are no longer being examined or treated (i.e., last patient's…	changed "Overall protocol accrual" to "overall accrual" under Completed, changed ""no longer being recruited; data analysis is complete" to "no longer being examined or treated (i.e., last patient's last visit has occurred)" under Terminated, inserted "; participants are no longer being examined or treated"	Overall Recruitment Status * Definition: Overall protocol accrual activity for the protocol. Select one. Not yet recruiting: participants are not yet being recruited or enrolled Recruiting: participants are currently being recruited and enrolled No longer recruiting: participants are no longer being recruited or enrolled Completed: participants are no longer being recruited; data analysis is comp…	inserted "Expanded Access Status * Definition: Status indicating availability of an experimental drug or device outside any clinical trial protocol. This data element is only applicable for Expanded Access records (see Expanded Access under Study Type). Select one. Available: expanded access is currently available for this treatment. No longer available: expanded access was available for this tre…			Overall Recruitment Status * Definition: Overall protocol accrual activity for the protocol. Select one. • Not yet recruiting: participants are not yet being recruited or enrolled • Recruiting: participants are currently being recruited and enrolled • No longer recruiting: participants are no longer being recruited or enrolled • Completed: participants are no longer being recruited; data analysis…	inserted "Withdrawn: study terminated prior to enrollment of first participant"									Overall Recruitment Status Submission: Required Definition: Overall protocol accrual activity for the protocol. Select one. • Not yet recruiting: participants are not yet being recruited or enrolled • Recruiting: participants are currently being recruited and enrolled • No longer recruiting: participants are no longer being recruited or enrolled • Completed: participants are no longer being recru…	changed "Overall Study Status" to "Overall Recruitment Status"			Overall Study Status Submission: Required Definition: Overall protocol accrual activity for the protocol. Select one. • Not yet recruiting: participants are not yet being recruited or enrolled • Recruiting: participants are currently being recruited and enrolled • No longer recruiting: participants are no longer being recruited or enrolled • Completed: participants are no longer being recruited; …	changed "protocol is not yet recruiting and enrolling participants" to "participants are not yet being recruited or enrolled" changed "protocol is actively recruiting and enrolling participants" to "participants are currently being recruited and enrolled" changed "protocol is not recruiting or enrolling participants" to "participants are no longer being recruited or enrolled" changed "protocol is…
phase	phase_id	CLINICAL_STUDY		Yes	Yes	2000-12			Study Phase * FDAAA Definition: Phase of investigation, as defined by the US FDA for trials involving investigational new drugs. Select only one. N/A: for trials without phases Phase 0: exploratory trials, involving very limited human exposure, with no therapeutic or diagnostic intent (e.g., screening studies, microdose studies). See FDA guidance on exploratory IND studies for more information. P…								Study Phase Definition: Phase of investigation, as defined by the US FDA for trials involving investigational new drugs. Select only one. N/A: for trials without phases Phase 0: exploratory trials, involving very limited human exposure, with no therapeutic or diagnostic intent (e.g., screening studies, microdose studies). See FDA guidance on exploratory IND studies for more information. Phase 1: …	under Phase 4, changed "post-marketing studies" to "studies of FDA-approved drugs"									Study Phase * Definition: Phase of investigation, as defined by the US FDA for trials involving investigational new drugs. Select only one. N/A: for trials without phases Phase 0: exploratory trials, involving very limited human exposure, with no therapeutic or diagnostic intent (e.g., screening studies, microdose studies). See FDA guidance on exploratory IND studies for more information. Phase 1…	under N/A, deleted "such as observational trials or expanded access trials"					Study Phase * Definition: Phase of investigation, as defined by the US FDA for trials involving investigational new drugs. Select only one. N/A: for trials without phases, such as observational trials or expanded access trials. Phase 0: exploratory trials, involving very limited human exposure, with no therapeutic or diagnostic intent (e.g., screening studies, microdose studies). See FDA guidance…	changed "Phase of investigation. Select only one." to "Phase of investigation, as defined by the US FDA for trials involving investigational new drugs. Select only one. N/A: for trials without phases, such as observational trials or expanded access trials. Phase 0: exploratory trials, involving very limited human exposure, with no therapeutic or diagnostic intent (e.g., screening studies, microdo…													Study Phase Submission: Required Definition: Phase of investigation. Select only one. Phase 1: includes initial studies to determine the metabolism and pharmacologic actions of drugs in humans, the side effects associated with increasing doses, and to gain early evidence of effectiveness; may include health participants and/or patients Phase 1/Phase 2: for trials that are a combination of phases …	under Phase1/Phase2, inserted ": for trials that are a combination of phases 1 and 2" under Phase2/Phase3, inserted ": for trials that are a combination of phases 2 and 3" changed "N/A: IND studies must not use this option" to "N/A: or trials without phases, such as expanded access trials or registries. Used rarely."
primary_completion_date		CLINICAL_STUDY		No	Yes	2007-12			Primary Completion Date FDAAA Definition: As specified in US Public Law 110-85, Title VIII, Section 801, with respect to an applicable clinical trial, the date that the final subject was examined or received an intervention for the purposes of final collection of data for the primary outcome, whether the clinical trial concluded according to the prespecified protocol or was terminated.								Primary Completion Date Definition: As specified in US Public Law 110-85, Title VIII, Section 801, with respect to an applicable clinical trial, the date that the final subject was examined or received an intervention for the purposes of final collection of data for the primary outcome, whether the clinical trial concluded according to the prespecified protocol or was terminated.	inserted new item "Primary Completion Date Definition: As specified in US Public Law 110-85, Title VIII, Section 801, with respect to an applicable clinical trial, the date that the final subject was examined or received an intervention for the purposes of final collection of data for the primary outcome, whether the clinical trial concluded according to the prespecified protocol or was terminate…
primary_completion_date_type	primary_completion_date_type_id	CLINICAL_STUDY		No	Yes	2007-12			FDAAA A "Type" menu is also included, with options Anticipated and Actual. For active studies, set Type to Anticipated and specify the expected completion date, updating the date as needed over the course of the study. Upon study completion, change Type to Actual and update the date if necessary.						FDAAA A "Type" menu is also included, with options Anticipated and Actual. For active studies, set Type to Anticipated and specify the expected completion date, updating the date as needed over the course of the study. Upon study completion, change Type to Actual and update the date if necessary.	changed "Use the Type menu (Anticipated/Actual) as described above." to "A "Type" menu is also included, with options Anticipated and Actual. For active studies, set Type to Anticipated and specify the expected completion date, updating the date as needed over the course of the study. Upon study completion, change Type to Actual and update the date if necessary."	Use the Type menu (Anticipated/Actual) as described above. [A "Type" menu is also included, with options Anticipated and Actual. For active studies, set Type to Anticipated and specify the expected completion date, updating the date as needed over the course of the study. Upon study completion, change Type to Actual and update the date if necessary.]	inserted new item "Use the Type menu (Anticipated/Actual) as described above. [A "Type" menu is also included, with options Anticipated and Actual. For active studies, set Type to Anticipated and specify the expected completion date, updating the date as needed over the course of the study. Upon study completion, change Type to Actual and update the date if necessary.]"
sampling_method	sampling_method_id	CLINICAL_STUDY		Yes	No	2007-10			Sampling Method * - For observational studies only, select one and explain in Detailed Description. • Probability Sample: exclusively random process to guarantee that each participant or population has specified chance of selection, such as simple random sampling, systematic sampling, stratified random sampling, cluster sampling, and consecutive patient sampling • Non-Probability Sample: any of a…										Sampling Method - For observational studies only, select one and explain in Detailed Description. • Probability Sample: exclusively random process to guarantee that each participant or population has specified chance of selection, such as simple random sampling, systematic sampling, stratified random sampling, cluster sampling, and consecutive patient sampling • Non-Probability Sample: any of a v…	inserted new item "Sampling Method - For observational studies only, select one and explain in Detailed Description. • Probability Sample: exclusively random process to guarantee that each participant or population has specified chance of selection, such as simple random sampling, systematic sampling, stratified random sampling, cluster sampling, and consecutive patient sampling • Non-Probability…
source		CLINICAL_STUDY		No	No	N/A			Definition not found
start_date		CLINICAL_STUDY		No	Yes	2000-12			Study Start Date FDAAA Definition: Date that enrollment to the protocol begins.																																Study Start Date Definition: Date that enrollment to the protocol begins.	changed "Start Date" to "Study Start Date"					Start Date Submission: Optional Definition: Date that enrollment to the protocol begins.	inserted "enrollment to"	Start Date Definition: Date that the protocol begins.
study_design		CLINICAL_STUDY		Yes (Interventional Study Design) No (Primary Purpose) No (Intervention Model) No (Allocation) No (Study Classification) Yes (Observational Study Model) Yes (Time Perspective)	Maybe (Interventional Study Design) Yes (Primary Purpose) Maybe (Intervention Model) Maybe (Allocation) No (Study Classification) No (Observational Study Model) No (Time Perspective)	2000-12			Interventional Study Design * (FDAAA) Definition: Primary investigative techniques used in the protocol. Select the most appropriate term describing the protocol from each of the following data elements. Observational Study Design								Interventional Study Design Definition: Primary investigative techniques used in the protocol. Select the most appropriate term describing the protocol from each of the following data elements. Observational Study Design	changed "Interventional Study Characteristics" to "Interventional Study Design" changed "the following categories" to "the following data elements" changed "Observational Study Characteristics" to "Observational Study Design"							Interventional Study Characteristics Definition: Primary investigative techniques used in the protocol. Select the most appropriate term describing the protocol from each of the following categories. Observational Study Characteristics	under Interventional Study Characteristics, changed "each of the six categories: Purpose, Allocation, Masking, Control, Assignment, and Endpoint" to "each of the following categories"	Interventional Study Characteristics Definition: Primary investigative techniques used in the protocol. Select the most appropriate term describing the protocol from each of the six categories: Purpose, Allocation, Masking, Control, Assignment, and Endpoint. Observational Study Characteristics	changed "Study Type (Interventional)" to Interventional Study Characteristics changed "Study Type (Observational)" to Observational Study Characteristics																					Study Type (Interventional) Definition: Primary investigative techniques used in the protocol. Select the most appropriate term describing the protocol from each of the six categories: Purpose, Allocation, Masking, Control, Assignment, and Endpoint. Study Type (Observational)
study_pop		CLINICAL_STUDY		Yes	No	2007-10			Definition: For observational studies only, a description of the population from which the groups or cohorts will be selected (e.g., primary care clinic, community sample, residents of a certain town). (Limit: 1000 characters)	inserted "(Limit: 1000 characters)"									Study Population Description Definition: For observational studies only, a description of the population from which the groups or cohorts will be selected (e.g., primary care clinic, community sample, residents of a certain town)."	inserted new item "Study Population Description Definition: For observational studies only, a description of the population from which the groups or cohorts will be selected (e.g., primary care clinic, community sample, residents of a certain town)."
study_type	study_type_id	CLINICAL_STUDY		Yes	Yes	2000-12			Study Type * FDAAA Definition: Nature of the investigation. Select one. • Interventional: studies in human beings in which individuals are assigned by an investigator based on a protocol to receive specific interventions. Subjects may receive diagnostic, therapeutic or other types of interventions. The assignment of the intervention may or may not be random. The individuals are then followed and …								Study Type Definition: Nature of the investigation. Select one. • Interventional: studies in human beings in which individuals are assigned by an investigator based on a protocol to receive specific interventions. Subjects may receive diagnostic, therapeutic or other types of interventions. The assignment of the intervention may or may not be random. The individuals are then followed and biomedic…	under Interventional, changed "assigned to receive" to "assigned by an investigator based on a protocol to receive" under Observational, changed "in a pre-defined group" to "in pre-defined groups" under Expanded Access, changed "patients who are failing on currently available treatments for their condition and also are unable to participate in ongoing clinical trials" to "patients who are not ade…											Study Type * Definition: Nature of the investigation. Select one. • Interventional: studies in human beings in which individuals are assigned to receive specific interventions. Subjects may receive diagnostic, therapeutic or other types of interventions. The assignment of the intervention may or may not be random. The individuals are then followed and biomedical and/or health outcomes are assesse…	inserted "Expanded Access: records describing the procedure for obtaining an experimental drug or device for patients who are failing on currently available treatments for their condition and also are unable to participate in ongoing clinical trials. Expanded Access records are used to register all types of non-protocol access to experimental treatments, including protocol exception, single-patie…					Study Type * Definition: Nature of the investigation. Select one. • Interventional: studies in human beings in which individuals are assigned to receive specific interventions. Subjects may receive diagnostic, therapeutic or other types of interventions. The assignment of the intervention may or may not be random. The individuals are then followed and biomedical and/or health outcomes are assesse…	under Observational, in middle of paragraph, deleted "*" (stray typo in middle of paragraph)	Study Type Definition: Nature of the investigation. Select one. • Interventional: studies in human beings in which individuals are assigned to receive specific interventions. Subjects may receive diagnostic, therapeutic or other types of interventions. The assignment of the intervention may or may not be random. The individuals are then followed and biomedical and/or health outcomes are assessed.…	changed "• Interventional: experimental studies in humans to investigate the safety and/or efficacy of a drug, gene therapy, vaccine, behavior, device, or procedure. • Observational: studies in humans that record specific events occurring in a defined population without any intervention by the researcher, such as natural history, screening, and psychosocial studies. " to "• Interventional: studie…
verification_date		CLINICAL_STUDY		Yes	Yes	2001-10			Record Verification Date * FDAAA Definition: Date the protocol information was last verified. Verification date is shown along with organization name on ClinicalTrials.gov to indicate to the public whether the information is being kept current, particularly recruiting status and contact information. Update verification date when reviewing the record for accuracy and completeness, even if no other…																						Record Verification Date * Definition: Date the protocol information was last verified. Verification date is shown along with organization name on ClinicalTrials.gov to indicate to the public whether the information is being kept current, particularly recruiting status and contact information. Update verification date when reviewing the record for accuracy and completeness, even if no other chang…	changed "Date the protocol information, including recruiting status, was last verified, whether changes were made or not." to "Date the protocol information was last verified. Verification date is shown along with organization name on ClinicalTrials.gov to indicate to the public whether the information is being kept current, particularly recruiting status and contact information. Update verificat…									Record Verification Date Definition: Date the protocol information, including recruiting status, was last verified, whether changes were made or not.	changed "Verification Date" to "Record Verification Date" changed "including status" to "including recruiting status" changed "are" to "were"							Verification Date Definition: Date the protocol information, including status, was last verified, whether changes are made or not.
why_stopped		CLINICAL_STUDY		No	No	2007-04			Why Study Stopped? Definition: For suspended, terminated or withdrawn studies, provide a brief explanation of why the study has been halted or terminated. If desired, use brief summary or detailed description to provide additional information. (Limit: 160 characters)	inserted "(Limit: 160 characters)"																	Why Study Stopped? Definition: For suspended, terminated or withdrawn studies, provide a brief explanation of why the study has been halted or terminated. If desired, use brief summary or detailed description to provide additional information.	inserted new item, "Why Study Stopped? Definition: For suspended, terminated or withdrawn studies, provide a brief explanation of why the study has been halted or terminated. If desired, use brief summary or detailed description to provide additional information."
condition		CONDITIONS		Yes	Yes	2000-12			Conditions and Keywords Conditions or Focus of Study * FDAAA Definition: Primary disease or condition being studied, or focus of the study. Diseases or conditions should use the National Library of Medicine's Medical Subject Headings (MeSH) controlled vocabulary when possible.																		Conditions or Focus of Study * Definition: Primary disease or condition being studied, or focus of the study. Diseases or conditions should use the National Library of Medicine's Medical Subject Headings (MeSH) controlled vocabulary when possible.	changed "Conditions" to "Conditions or Focus of Study" changed Definition from "Primary disease or condition being studied, using the National Library of Medicine's Medical Subject Headings (MeSH) controlled vocabulary. The condition field is used to index studies in ClinicalTrials.gov." to "Primary disease or condition being studied, or focus of the study. Diseases or conditions should use the N…					Conditions and Keywords Conditions * Definition: Primary disease or condition being studied, using the National Library of Medicine's Medical Subject Headings (MeSH) controlled vocabulary. The condition field is used to index studies in ClinicalTrials.gov.	changed "diseases or conditions" to "disease or condition" changed "The conditions are used" to "The condition field is used" deleted "Select up to five disease or condition terms."													Conditions Submission: Required Definition: Primary diseases or conditions being studied, using the National Library of Medicine's Medical Subject Headings (MeSH) controlled vocabulary. The conditions are used to index studies in ClinicalTrials.gov. Select up to five disease or condition terms.	deleted "from the following MeSH categories: Diseases (C), Behavior and Behavior Modification (F01), and Mental Disorders (F03)"
condition_id		CONDITIONS		No	No	N/A
nct_id		CONDITIONS		No	No	N/A			Definition not found
design_id		DESIGNS		No	No	N/A
design_name	design_name_id	DESIGNS		Yes (Interventional Study Design) No (Primary Purpose) No (Intervention Model) No (Allocation) No (Study Classification) Yes (Observational Study Model) Yes (Time Perspective)	Maybe (Interventional Study Design) Yes (Primary Purpose) Maybe (Intervention Model) Maybe (Allocation) No (Study Classification) No (Observational Study Model) No (Time Perspective)	2000-12			Interventional Study Design * (FDAAA) Definition: Primary investigative techniques used in the protocol. Select the most appropriate term describing the protocol from each of the following data elements. Primary Purpose FDAAA - reason for the protocol • Treatment: protocol designed to evaluate one or more interventions for treating a disease, syndrome or condition • Prevention: protocol designed …								Primary Purpose - reason for the protocol • Treatment: protocol designed to evaluate one or more interventions for treating a disease, syndrome or condition • Prevention: protocol designed to assess one or more interventions aimed at preventing the development of a specific disease or health condition • Diagnostic: protocol designed to evaluate one or more interventions aimed at identifying a dis…	under Supportive Care, changed "designed to evaluation interventions" to "designed to evaluate one or more interventions" under Health Services Research, changed "protocol design to evaluate" to "protocol designed to evaluate" changed "Study Design" to "Intervention Model" under Double Blind, changed "both participants" to "two or more parties" under Allocation, changed "participant selection" to…	Study Characteristics Interventional Study Characteristics Definition: Primary investigative techniques used in the protocol. Select the most appropriate term describing the protocol from each of the following categories. Primary Purpose * - reason for the protocol • Treatment: protocol designed to evaluate one or more interventions for treating a disease, syndrome or condition • Prevention: prot…	inserted "Study Classification (formerly Endpoint) - type of primary outcome or endpoint that the protocol is designed to evaluate. Select one. • N/A: not applicable • Safety: show if the drug is safe under conditions of proposed use • Efficacy: measure of an intervention's influence on a disease or health condition • Safety/Efficacy • Bio-equivalence: scientific basis for comparing generic and b…	Study Characteristics Interventional Study Characteristics Definition: Primary investigative techniques used in the protocol. Select the most appropriate term describing the protocol from each of the following categories. Primary Purpose * - reason for the protocol • Treatment: protocol designed to evaluate one or more interventions for treating a disease, syndrome or condition • Prevention: prot…	deleted "Control - nature of the intervention control • Placebo: participants may receive only placebo throughout the course of the protocol • Active: participants may receive some form of treatment (e.g., standard treatment) in place of the intervention under investigation • Uncontrolled: no controls are used • Historical: the control consists of results from past studies • Dose Comparison: part…	Study Characteristics Interventional Study Characteristics Definition: Primary investigative techniques used in the protocol. Select the most appropriate term describing the protocol from each of the following categories. Primary Purpose * - reason for the protocol • Treatment: protocol designed to evaluate one or more interventions for treating a disease, syndrome or condition • Prevention: prot…	under Masking, inserted "If Single Blind or Double Blind is selected, check the role(s) that are to be masked: Subject, Caregiver, Investigator or Outcomes Assessor."	Study Characteristics Interventional Study Characteristics Definition: Primary investigative techniques used in the protocol. Select the most appropriate term describing the protocol from each of the following categories. Primary Purpose * - reason for the protocol • Treatment: protocol designed to evaluate one or more interventions for treating a disease, syndrome or condition • Prevention: prot…	under Interventional Study Characteristics, changed "the six categories: Purpose, Allocation, Masking, Control, Assignment, and Endpoint" to "the following categories" under Primary Purpose, changed "Diagnosis" to "Diagnostic" under Primary Purpose, deleted bullet "• Educational/Counseling/Training: protocol designed to assess one or more interventions in an educational, counseling or training en…	Study Characteristics Interventional Study Characteristics Definition: Primary investigative techniques used in the protocol. Select the most appropriate term describing the protocol from each of the six categories: Purpose, Allocation, Masking, Control, Assignment, and Endpoint. Primary Purpose * - reason for the protocol • Treatment: protocol designed to evaluate one or more interventions for t…	changed "Study Design" to "Study Characteristics" changed "Study Type (Interventional)" to "Interventional Study Characteristics" changed "Purpose - reason for the protocol" to "Primary Purpose - reason for the protocol" - twice (once under Interventional, once under Observational) inserted "• Basic Science: protocol designed to examine the basic mechanism of action (e.g., physiology, biomechanic…	Study Design Study Type (Interventional) Definition: Primary investigative techniques used in the protocol. Select the most appropriate term describing the protocol from each of the six categories: Purpose, Allocation, Masking, Control, Assignment, and Endpoint. Purpose * - reason for the protocol • Treatment: protocol designed to evaluate one or more interventions for treating a disease, syndrom…	deleted "Expanded Access: includes treatment IND protocols"	Study Design Study Type (Interventional) Definition: Primary investigative techniques used in the protocol. Select the most appropriate term describing the protocol from each of the six categories: Purpose, Allocation, Masking, Control, Assignment, and Endpoint. Purpose * - reason for the protocol • Treatment: protocol designed to evaluate one or more interventions for treating a disease, syndrom…	under Study Type (Interventional) Purpose, inserted "• Supportive Care: protocol designed to evaluation interventions where the primary intent is to maximize comfort, minimize side effects or mitigate against a decline in the subject's health or function. In general, supportive care interventions are not intended to cure a disease. • Screening: protocol designed to assess or examine methods of id…											Study Design Study Type (Interventional) Submission: Required Definition: Primary investigative techniques used in the protocol. Select the most appropriate term describing the protocol from each of the six categories: Purpose, Allocation, Masking, Control, Assignment, and Endpoint. Purpose: reason for the protocol Submission: Required • Treatment: protocol designed to evaluate one or more interv…	under Control, changed "None" to "Uncontrolled" under Assignment, changed "received some intervention" to "received an intervention" inserted new bullet, "• Expanded Access: includes treatment IND protocols"	Study Design Study Type (Interventional) Submission: Required Definition: Primary investigative techniques used in the protocol. Select the most appropriate term describing the protocol from each of the six categories: Purpose, Allocation, Masking, Control, Assignment, and Endpoint. Purpose: reason for the protocol Submission: Required • Treatment: protocol designed to evaluate one or more interv…	under Allocation and Masking and Control and Assignment and Endpoint and Duration and Selection and Timing, changed "Required" to "Optional"	Study Design Study Type (Interventional) Submission: Required Definition: Primary investigative techniques used in the protocol. Select the most appropriate term describing the protocol from each of the six categories: Purpose, Allocation, Masking, Control, Assignment, and Endpoint. Purpose: reason for the protocol Submission: Required • Treatment: protocol designed to evaluate one or more interv…	under Endpoint Safety, changed "shows" to "show if"
design_value	design_value_id	DESIGNS		Yes (Interventional Study Design) No (Primary Purpose) No (Intervention Model) No (Allocation) No (Study Classification) Yes (Observational Study Model) Yes (Time Perspective)	Maybe (Interventional Study Design) Yes (Primary Purpose) Maybe (Intervention Model) Maybe (Allocation) No (Study Classification) No (Observational Study Model) No (Time Perspective)	2000-12			value of design name choices above [meaning the Design Name definition immediately above, already includes the several value choices listed under the many design items]
masked_role		DESIGNS		No	Maybe	2000-12			Included in "Design name"_x000D_ _x000D_ Masking (FDAAA) (at least one of the following required: Intervention Model, Masking, Allocation. All may be required as part of Study Design under PL 110-85, Section 801) - knowledge of intervention assignments * Open: no masking is used. All involved know the identity of the intervention assignment. * Single Blind: one party, either the investigator or p…
nct_id		DESIGNS		No	No	N/A
facility_id		FACILITIES		No	No	N/A
location_id		FACILITIES		No	No	N/A
name		FACILITIES		Yes	Maybe	2000-12			If Overall Status is "Recruiting": • At least one location must be specified. • At least one location must have status set to "Recruiting". • All locations must have status specified. • Either any location that is recruiting must have Contact specified, or Overall Contact must be specified. Multiple locations may be specified. Location is composed of the following fields. Facility * (FDAAA) Name:…	inserted "If Overall Status is "Recruiting": • At least one location must be specified. • At least one location must have status set to "Recruiting". • All locations must have status specified. • Either any location that is recruiting must have Contact specified, or Overall Contact must be specified." inserted "(Limit: 254 characters)"																																							Multiple locations may be specified. Location is composed of the following fields. Facility Name: Full name of the organization where the protocol is being conducted. Examples: UCLA Eye Institute; Springfield Memorial Hospital
nct_id		FACILITIES		No	No	N/A			Definition not found
arm_group_label		INTERVENTION_ARM_GROUPS		Yes	Maybe	2007-07			Arms/Groups * (FDAAA) - if arms or groups have been specified for the protocol, select the ones for which the intervention is to be administered. For interventional studies with arms specified, all arms must have at least one intervention (unless arm type is "No Intervention") and each intervention must be assigned to at least one arm. For observational studies with groups specified, each interve…																Arms/Groups - if arms or groups have been specified for the protocol, select the ones for which the intervention is to be administered. For interventional studies with arms specified, all arms must have at least one intervention (unless arm type is "No Intervention") and each intervention must be assigned to at least one arm. For observational studies with groups specified, each intervention (if …	inserted new item "Arms/Groups - if arms or groups have been specified for the protocol, select the ones for which the intervention is to be administered. For interventional studies with arms specified, all arms must have at least one intervention (unless arm type is "No Intervention") and each intervention must be assigned to at least one arm. For observational studies with groups specified, eac…
int_arm_group_id		INTERVENTION_ARM_GROUPS		No	No	N/A
intervention_id		INTERVENTION_ARM_GROUPS		No	No	N/A
nct_id		INTERVENTION_ARM_GROUPS		No	No	N/A			Definition not found
int_other_name_id		INTERVENTION_OTHER_NAMES		No	No	N/A
intervention_id		INTERVENTION_OTHER_NAMES		No	No	N/A
nct_id		INTERVENTION_OTHER_NAMES		No	No	N/A			Definition not found
other_name		INTERVENTION_OTHER_NAMES		No	No	2007-07			Other Names - list other names used to identify the intervention, past or present (e.g., brand name for a drug). These names will be used to improve search results in ClinicalTrials.gov. (Limit: 160 characters per name)	inserted "(Limit: 160 characters per name)"															Other Names - list other names used to identify the intervention, past or present (e.g., brand name for a drug). These names will be used to improve search results in ClinicalTrials.gov.	inserted new item "Other Names - list other names used to identify the intervention, past or present (e.g., brand name for a drug). These names will be used to improve search results in ClinicalTrials.gov."
description		INTERVENTIONS		No	Maybe	2007-07			Intervention Description (FDAAA) - cover key details of the intervention. Must be sufficiently detailed to distinguish between arms of a study (e.g., comparison of different dosages of drug) and/or among similar interventions (e.g., comparison of multiple implantable cardiac defibrillators). For example, interventions involving drugs may include dosage form, dosage, frequency and duration. (Limit…	inserted "(Limit: 1600 characters)"					Intervention Description (FDAAA) - cover key details of the intervention. Must be sufficiently detailed to distinguish between arms of a study (e.g., comparison of different dosages of drug) and/or among similar interventions (e.g., comparison of multiple implantable cardiac defibrillators). For example, interventions involving drugs may include dosage form, dosage, frequency and duration. Exampl…	changed "For drugs include dosage form, dosage, frequency and duration." to "Must be sufficiently detailed to distinguish between arms of a study (e.g., comparison of different dosages of drug) and/or among similar interventions (e.g., comparison of multiple implantable cardiac defibrillators). For example, interventions involving drugs may include dosage form, dosage, frequency and duration."									Intervention Description - cover key details of the intervention. For drugs include dosage form, dosage, frequency and duration. Example: 50 mg/m2, IV (in the vein) on day 5 of each 28 day cycle. Number of Cycles: until progression or unacceptable toxicity develops.	inserted new item "Intervention Description - cover key details of the intervention. For drugs include dosage form, dosage, frequency and duration. Example: 50 mg/m2, IV (in the vein) on day 5 of each 28 day cycle. Number of Cycles: until progression or unacceptable toxicity develops."
intervention_id		INTERVENTIONS		No	No	N/A
intervention_name		INTERVENTIONS		Yes	Yes	2000-12			Intervention Name * FDAAA - for drugs use generic name; for other types of interventions provide a brief descriptive name. (Limit: 160 characters) For investigational new drugs that do not yet have a generic name, a chemical name, company code or serial number may be used on a temporary basis. As soon as the generic name has been established, update the associated protocol records accordingly. Fo…	inserted "(Limit: 160 characters)"					Intervention Name * FDAAA - for drugs use generic name; for other types of interventions provide a brief descriptive name. For investigational new drugs that do not yet have a generic name, a chemical name, company code or serial number may be used on a temporary basis. As soon as the generic name has been established, update the associated protocol records accordingly. For non-drug intervention …	inserted "For non-drug intervention types, provide an intervention name with sufficient detail so that it can be distinguished from other similar interventions."					Intervention Name * - for drugs use generic name; for other types of interventions provide a brief descriptive name. For investigational new drugs that do not yet have a generic name, a chemical name, company code or serial number may be used on a temporary basis. As soon as the generic name has been established, update the associated protocol records accordingly.	changed "generic name of the precise intervention being studied" to "for drugs use generic name; for other types of interventions provide a brief descriptive name"			Intervention Name * - generic name of the precise intervention being studied For investigational new drugs that do not yet have a generic name, a chemical name, company code or serial number may be used on a temporary basis. As soon as the generic name has been established, update the associated protocol records accordingly.	deleted "Examples: Zidovudine (drug) Self-hypnotic relaxation (behavior)"			Intervention Name * - generic name of the precise intervention being studied For investigational new drugs that do not yet have a generic name, a chemical name, company code or serial number may be used on a temporary basis. As soon as the generic name has been established, update the associated protocol records accordingly. Examples: Zidovudine (drug) Self-hypnotic relaxation (behavior)	inserted "For investigational new drugs that do not yet have a generic name, a chemical name, company code or serial number may be used on a temporary basis. As soon as the generic name has been established, update the associated protocol records accordingly."																	Intervention Name Definition: generic name of the precise intervention being studied Examples: Zidovudine (drug) Self-hypnotic relaxation (behavior)	changed "Exercise" to "Self-hypnotic relaxation"
intervention_type	intervention_type_id	INTERVENTIONS		Yes	Yes	2000-12			For all studies, and for expanded access records, specify the associated intervention(s). For interventional studies, at least one intervention must be specified. Intervention Type * FDAAA - select one per intervention • Drug (including placebo) • Device (including sham) • Biological/Vaccine • Procedure/Surgery • Radiation • Behavioral (e.g., Psychotherapy, Lifestyle Counseling) • Genetic (includ…	inserted "For interventional studies, at least one intervention must be specified."							For all studies, and for expanded access records, specify the associated intervention(s). Intervention Type - select one per intervention • Drug (including placebo) • Device (including sham) • Biological/Vaccine • Procedure/Surgery • Radiation • Behavioral (e.g., Psychotherapy, Lifestyle Counseling) • Genetic (including gene transfer, stem cell and recombinant DNA) • Dietary Supplement (e.g., vit…	under Drug, inserted "(including placebo)" under Device, inserted "(including sham)"							For all studies, and for expanded access records, specify the associated intervention(s). Intervention Type * - select one per intervention • Drug • Device • Biological/Vaccine • Procedure/Surgery • Radiation • Behavioral (e.g., Psychotherapy, Lifestyle Counseling) • Genetic (including gene transfer, stem cell and recombinant DNA) • Dietary Supplement (e.g., vitamins, minerals) • Other	changed "Definition: Primary interventions being studied. Provide specific name and type for each intervention (up to 10 items). Intervention Type * - select one per intervention • Drug • Gene Transfer - including gene transfer and recombinant DNA (e.g., Human nerve growth factor) • Vaccine • Behavior (e.g., Protein and calorie controlled diet; Self-hypnotic relaxation) • Device (e.g., Defibrilla…																					Interventions Submission: Required Definition: Primary interventions being studied. Provide specific name and type for each intervention (up to 10 items). Intervention Type: select one per intervention • Drug • Gene Transfer - including gene transfer and recombinant DNA (e.g., Human nerve growth factor) • Vaccine • Behavior (e.g., Protein and calorie controlled diet; Self-hypnotic relaxation) • D…	under Gene Transfer, inserted "(e.g., Human nerve growth factor)" under Behavior, inserted "(e.g., Protein and calorie controlled diet; Self-hypnotic relaxation)" under Device, inserted "(e.g., Defibrillators, implantable; Electronic medication reminder system)" under Procedure, inserted "(e.g., Adenoidectomy; Bronchoalveolar lavage)"	Interventions Definition: Primary interventions being studied. Provide specific name and type for each intervention (up to 10 items). Intervention Type: select one per intervention o Drug o Gene Transfer - including gene transfer and recombinant DNA o Vaccine o Behavior o Device o Procedure
nct_id		INTERVENTIONS		No	No	N/A			Definition not found
keyword		KEYWORDS		No	No	2000-12			Keywords Definition: Words or phrases that best describe the protocol. Keywords help users find studies in the database. Use NLM's Medical Subject Heading (MeSH) controlled vocabulary terms where appropriate. Be as specific and precise as possible. Avoid acronyms and abbreviations.
keyword_id		KEYWORDS		No	No	N/A
nct_id		KEYWORDS		No	No	N/A			Definition not found
description		LINKS		No	No	2000-12			Description Definition: title or brief description of the linked page. If the page being linked is the protocol's home page on the sponsor's Web site, include the words "Click here for more information about this study:" and provide the name of the protocol. (Limit: 254 characters) Examples: Click here for more information about this study: Clinical Trial of Eye Prophylaxis in the Newborn The Alz…	inserted "(Limit: 254 characters)"																																					Description Submission: Optional Definition: title or brief description of the linked page. If the page being linked is the protocol's home page on the sponsor's Web site, include the words "Click here for more information about this study:" and provide the name of the protocol. Examples: Click here for more information about this study: Clinical Trial of Eye Prophylaxis in the Newborn The Alzhei…	deleted "REFERENCES ________________________________________ • Code of Federal Regulations, Title21 (CFR 21) • HCFA Medicare Coverage Policy ~ Clinical Trials: Final National Coverage Decision (http://www.hcfa.gov/coverage/8d2.htm)"	Description Definition: title or brief description of the linked page. If the page being linked is the protocol's home page on the sponsor's Web site, include the words "Click here for more information about this study:" and provide the name of the protocol. Examples:  Click here for more information about this study: Clinical Trial of Eye Prophylaxis in the Newborn.  The Alzheimer's Disease Ed…
link_id		LINKS		No	No	N/A
nct_id		LINKS		No	No	N/A			Definition not found
url		LINKS		No	No	2000-12			Links Definition: A Web site directly relevant to the protocol may be entered, if desired. Do not include sites whose primary goal is to advertise or sell commercial products or services. Links to educational, research, government, and other non-profit Web pages are acceptable. All submitted links are subject to review by ClinicalTrials.gov. URL Definition: complete URL, including http:// (Limit:…	under URL, inserted "(Limit: 254 characters)"																																	Links Submission: Optional Definition: A Web site directly relevant to the protocol may be entered, if desired. Do not include sites whose primary goal is to advertise or sell commercial products or services. Links to educational, research, government, and other non-profit Web pages are acceptable. All submitted links are subject to review by ClinicalTrials.gov. URL Submission: Optional Definitio…	under Links, inserted "Links to educational, research, government, and other non-profit Web pages are acceptable. All submitted links are subject to review by ClinicalTrials.gov."			Links Submission: Optional Definition: A Web site directly relevant to the protocol may be entered, if desired. Do not include sites whose primary goal is to advertise or sell commercial products or services. URL Submission: Optional Definition: complete URL, including http:// Example: http://www.alzheimers.org/	changed "Web sites related to the study" to "A Web site directly relevant to the protocol"
degrees		LOCATION_CONTACTS		No	No	2000-12			Degree Contact information limit: Degrees: 30 characters
email		LOCATION_CONTACTS		Yes	Maybe	2000-12			Email * (FDAAA): (or Phone required) electronic mail address of the facility contact person Contact information limit: Email: 254 characters								• Email: electronic mail address of the facility contact person
first_name		LOCATION_CONTACTS		No	No	2000-12			First Name Contact information limit: First Name: 62 characters
full_name		LOCATION_CONTACTS		No	No	N/A
last_name		LOCATION_CONTACTS		Yes	Maybe	2000-12			Last Name for Facility Contact and Facility Contact Backup * (FDAAA) Last Name for Investigators (at the protocol location) Contact information limit: Last Name: 62 characters
location_contact_id		LOCATION_CONTACTS		No	No	N/A
location_id		LOCATION_CONTACTS		No	No	N/A
middle_initial		LOCATION_CONTACTS		No	No	2000-12			Middle Initial
nct_id		LOCATION_CONTACTS		No	No	N/A			Definition not found
person_type	location_person_type_id	LOCATION_CONTACTS		Yes	Maybe	2000-12			Facility Contact * (FDAAA) (or Central Contact required) Facility Contact Backup Person to contact if Facility Contact is not available (i.e., a second contact person). Investigators (at the protocol location)
phone		LOCATION_CONTACTS		Yes	Maybe	2000-12			Phone * (FDAAA): (or Email required) office phone of the facility contact person. Use the format 123-456-7890 within the United States and Canada. Otherwise, provide the country code. Contact information limit: Phone: 30 characters								• Phone: office phone of the facility contact person. Use the format 123-456-7890 within the United States and Canada. Otherwise, provide the country code.
phone_ext		LOCATION_CONTACTS		No	No	2000-12			Ext: phone extension, if needed Contact information limit: Phone Ext: 14 characters
role	location_role_id	LOCATION_CONTACTS		No	No	2000-12			Role: Site Principal Investigator or Site Sub-Investigator (pick one)																												Site Principal Investigator or Site Sub-Investigator (pick one)	changed from "Principal Investigator or Sub-Investigator (pick one)" to "Site Principal Investigator or Site Sub-Investigator (pick one)"	Principal Investigator or Sub-Investigator (pick one)
location_id		LOCATIONS		No	No	N/A
nct_id		LOCATIONS		No	No	N/A			Definition not found
status	status_id	LOCATIONS		Yes	Yes	2000-12			Recruitment Status * FDAAA - protocol accrual activity at a facility. Select one. Not yet recruiting: participants are not yet being recruited Recruiting: participants are currently being recruited Enrolling by invitation: participants are being (or will be) selected from a predetermined population Active, not recruiting: study is ongoing (i.e., patients are being treated or examined), but partic…										Recruitment Status * - protocol accrual activity at a facility. Select one. Not yet recruiting: participants are not yet being recruited Recruiting: participants are currently being recruited Enrolling by invitation: participants are being (or will be) selected from a predetermined population Active, not recruiting: study is ongoing (i.e., patients are being treated or examined), but participants…	under Not Yet Recruiting, changed "participants are not yet being recruited or enrolled" to "participants are not yet being recruited" under Recruiting, changed "participants are currently being recruited and enrolled" to "participants are currently being recruited" deleted "• No longer recruiting: participants are no longer being recruited or enrolled" inserted "• Enrolling by invitation: partic…					Recruitment Status * - protocol accrual activity at a facility. Select one. Not yet recruiting: participants are not yet being recruited or enrolled Recruiting: participants are currently being recruited and enrolled No longer recruiting: participants are no longer being recruited or enrolled Completed: the study has concluded normally; participants are no longer being examined or treated (i.e., …	changed "• Completed: participants are no longer being recruited; data analysis is complete • Suspended: recruiting or enrolling participants has halted but potentially will resume • Terminated: recruiting or enrolling participants has halted and will not resume; participents are no longer being examined or treated • Withdrawn: recruitment terminated prior to enrollment of first participant" to "…	Recruitment Status * - protocol accrual activity at a facility. Select one. • Not yet recruiting: participants are not yet being recruited or enrolled • Recruiting: participants are currently being recruited and enrolled • No longer recruiting: participants are no longer being recruited or enrolled • Completed: participants are no longer being recruited; data analysis is complete • Suspended: rec…	under Terminated, inserted "; participents are no longer being examined or treated"					Recruitment Status * - protocol accrual activity at a facility. Select one. Not yet recruiting: participants are not yet being recruited or enrolled Recruiting: participants are currently being recruited and enrolled No longer recruiting: participants are no longer being recruited or enrolled Completed: participants are no longer being recruited; data analysis is complete Suspended: recruiting or…	inserted "Withdrawn: recruitment terminated prior to enrollment of first participant"	Recruitment Status * - protocol accrual activity at a facility. Select one. • Not yet recruiting: participants are not yet being recruited or enrolled • Recruiting: participants are currently being recruited and enrolled • No longer recruiting: participants are no longer being recruited or enrolled • Completed: participants are no longer being recruited; data analysis is complete • Suspended: rec…	inserted "Tip: When a trial's overall status changes to 'No longer recruiting,' it is not necessary to change recruitment status for each location. Location recruitment status is only shown on ClinicalTrials.gov when Overall Status is 'Recruiting'."											Recruitment Status: protocol accrual activity at a facility. Select one. Submission: Required (if Overall Status is "Recruiting") • Not yet recruiting: participants are not yet being recruited or enrolled • Recruiting: participants are currently being recruited and enrolled • No longer recruiting: participants are no longer being recruited or enrolled • Completed: participants are no longer being…	changed "the protocol is not yet recruiting and enrolling participants" to "participants are not yet being recruited or enrolled" changed "the protocol is actively recruiting and enrolling participants" to "participants are currently being recruited and enrolled" changed "the protocol is not recruiting or enrolling participants" to "participants are no longer being recruited or enrolled" changed …
mesh_id		MESH_TREES		No	No	N/A
mesh_term		MESH_TREES		No	No	N/A
mesh_tree_id		MESH_TREES		No	No	N/A
mesh_type	mesh_type_id	MESH_TREES		No	No	N/A
nct_id		MESH_TREES		No	No	N/A
node_name		MESH_TREES		No	No	N/A
node_value		MESH_TREES		No	No	N/A
mesh_id		MESH_TREES_RAW		No	No	N/A
mesh_term		MESH_TREES_RAW		No	No	N/A
description		OUTCOMES		No	No	2010-02			Description - Additional information about the outcome measure, if needed for clarification. (Limit: 600 characters)	inserted "(Limit: 600 characters)"	Description - Additional information about the outcome measure, if needed for clarification.	inserted new item "Description - Additional information about the outcome measure, if needed for clarification."
measure		OUTCOMES		Yes	No	2000-12			Title * - A concise name for the specific measure that will be used to determine the effect of the intervention(s) or, for observational studies, related to core objectives of the study and receiving the most emphasis in assessment. (Limit: 254 characters) Examples: Title: all cause mortality Title: Evidence of clinically definite ischemic stroke (focal neurological deficits persisting for more t…	inserted "(Limit: 254 characters)"	Title * - A concise name for the specific measure that will be used to determine the effect of the intervention(s) or, for observational studies, related to core objectives of the study and receiving the most emphasis in assessment. Examples: Title: all cause mortality Title: Evidence of clinically definite ischemic stroke (focal neurological deficits persisting for more than 24 hours) confirmed …	changed "Outcome Measure" to "Title" changed "The specific measure" to "A concise name for the specific measure" under Examples, changed "Outcome Measure" to "Title" - twice					Outcome Measure - The specific measure that will be used to determine the effect of the intervention(s) or, for observational studies, related to core objectives of the study and receiving the most emphasis in assessment. Example: Outcome Measure: all cause mortality Outcome Measure: Evidence of clinically definite ischemic stroke (focal neurological deficits persisting for more than 24 hours) co…	changed " Primary Outcome Measures Definition: The specific measure that will be used to determine the effect of the intervention(s) or, for observational studies, related to core objectives of the study and receiving the most emphasis in assessment. Include the time frame for taking measurements. Examples: Measure: all cause mortality Measure: Evidence of clinically definite ischemic stroke (foc…	Outcome Measures WHO Definition: Specific measurements or observations used to measure the effect of experimental variables in a study, or for observational studies, to describe patterns of diseases or traits or associations with exposures, risk factors or treatment. Primary Outcome Measures Definition: The specific measure that will be used to determine the effect of the intervention(s) or, for …	under Outcome Measures definition, inserted ", or for observational studies, to describe patterns of diseases or traits or associations with exposures, risk factors or treatment." changed Primary Outcome Measures definition from "The specific measure that will be used to determine the effect of the intervention(s), along with the time frame for taking measurements. " to "The specific measure that…							Outcome Measures WHO Definition: Specific measurements or observations used to measure the effect of experimental variables in a study. Primary Outcome Measures Definition: The specific measure that will be used to determine the effect of the intervention(s), along with the time frame for taking measurements. Examples: Measure: all cause mortality Time Frame: one year Measure: Evidence of clinica…	changed Primary Outcome Measures Definition from "The specific measure that will be used to determine the effect of the intervention(s). The description should include the time at which the measure will be taken." to "The specific measure that will be used to determine the effect of the intervention(s), along with the time frame for taking measurements." changed Primary Outcome Examples from "all…							Outcome Measures WHO Definition: Specific measurements or observations used to measure the effect of experimental variables in a study. Primary Outcome Measures Definition: The specific measure that will be used to determine the effect of the intervention(s). The description should include the time at which the measure will be taken. Examples: all cause mortality at one year; score on a depressio…	changed "Outcomes" to "Outcome Measures WHO" changed "Primary Outcomes" to "Primary Outcome Measures" changed "Secondary Outcomes" to "Secondary Outcome Measures"
nct_id		OUTCOMES		No	No	N/A
outcome_id		OUTCOMES		No	No	N/A
safety_issue	YN	OUTCOMES		No	Maybe	2007-12			Safety Issue? (FDAAA) - Is this outcome measure assessing a safety issue? Select: Yes/No [Examples:] Safety Issue: No Safety Issue: Yes								Safety Issue? - Is this outcome measure assessing a safety issue? Select: Yes/No Examples Safety Issue: No Safety Issue: Yes	inserted new item "Safety Issue? - Is this outcome measure assessing a safety issue? Select: Yes/No Examples Safety Issue: No Safety Issue: Yes"
time_frame		OUTCOMES		No	Maybe	2007-12			Time Frame (FDAAA) - Time point(s) at which outcome measure is assessed. (Limit: 254 characters) [Examples:] Time Frame: one year Time Frame: within the first 30 days (plus or minus 3 days) after surgery	inserted "(Limit: 254 characters)"							Time Frame - Time point(s) at which outcome measure is assessed. Examples: Time Frame: one year Time Frame: within the first 30 days (plus or minus 3 days) after surgery	inserted new item "Time Frame - Time point(s) at which outcome measure is assessed. Examples: Time Frame: one year Time Frame: within the first 30 days (plus or minus 3 days) after surgery "
type		OUTCOMES		No	Yes	2004-09			Primary and Secondary Outcome Measures NOTE: When Results are added to a record, outcome measures are transferred from the protocol section to the results section. Primary Outcome Measure FDAAA Definition: Specific key measurement(s) or observation(s) used to measure the effect of experimental variables in a study, or for observational studies, to describe patterns of diseases or traits or associ…		Primary and Secondary Outcome Measures NOTE: When Results are added to a record, outcome measures are transferred from the protocol section to the results section. Primary Outcome Measure FDAAA Definition: Specific key measurement(s) or observation(s) used to measure the effect of experimental variables in a study, or for observational studies, to describe patterns of diseases or traits or associ…	under Secondary Outcome Measures, changed "Specify Outcome Measure, Time Frame and Safety Issue (see above)." to "Specify Title, Time Frame, Description (if needed) and Safety Issue as described above."	Primary and Secondary Outcome Measures NOTE: When Results are added to a record, outcome measures are transferred from the protocol section to the results section. Primary Outcome Measure FDAAA Definition: Specific key measurement(s) or observation(s) used to measure the effect of experimental variables in a study, or for observational studies, to describe patterns of diseases or traits or associ…	under Primary and Secondary Outcome Measures, inserted "NOTE: When Results are added to a record, outcome measures are transferred from the protocol section to the results section."			Primary and Secondary Outcome Measures Primary Outcome Measure Definition: Specific key measurement(s) or observation(s) used to measure the effect of experimental variables in a study, or for observational studies, to describe patterns of diseases or traits or associations with exposures, risk factors or treatment. Secondary Outcome Measures Definition: Other key measures that will be used to ev…	changed "Outcome Measures WHO Definition: Specific measurements or observations used to measure the effect of experimental variables in a study, or for observational studies, to describe patterns of diseases or traits or associations with exposures, risk factors or treatment. Secondary Outcome Measures Definition: Other key measures that will be used to evaluate the intervention(s) or, for observ…																			Outcomes: Definition: Specific measurements or observations used to measure the effect of experimental variables in a study. Primary Outcomes: Definition: The specific measure that will be used to determine the effect of the intervention(s). The description should include the time at which the measure will be taken. Examples: all cause mortality at one year; score on a depression rating scale at …	changed Primary Outcomes from "Definition: Main outcome(s) representing a primary study question(s). Examples: congestive heart failure; fatal stroke; cognitive function" to "Definition: The specific measure that will be used to determine the effect of the intervention(s). The description should include the time at which the measure will be taken. Examples: all cause mortality at one year; score …			Outcomes: Definition: Specific measurements or observations used to measure the effect of experimental variables in a study. Primary Outcomes: Definition: Main outcome(s) representing a primary study question(s). Examples: congestive heart failure; fatal stroke; cognitive function Secondary Outcomes: Definition: Outcome(s) of interest to a study, but not representing the primary study question(s)…	inserted new item "Outcomes: Definition: Specific measurements or observations used to measure the effect of experimental variables in a study. Primary Outcomes: Definition: Main outcome(s) representing a primary study question(s). Examples: congestive heart failure; fatal stroke; cognitive function Secondary Outcomes: Definition: Outcome(s) of interest to a study, but not representing the primar…
affiliation		PERSONS		No	No	2000-12			Organizational Affiliation: Full name of the official's organization. If none, specify Unaffiliated. (Limit: 255 characters)	inserted "(Limit: 255 characters)"																											Organizational Affiliation: Full name of the official's organization. If none, specify Unaffiliated.	inserted "If none, specify Unaffiliated."	Organizational Affiliation: Full name of the official's organization.
degrees		PERSONS		No	No	2000-12			Degree Contact information limit: Degrees: 30 characters	inserted "Contact information limit": "30 characters"
email		PERSONS		Yes	Maybe	2000-12			Email * (FDAAA): electronic mail address of the central contact person Contact information limit: Email: 254 characters	inserted "Contact information limit": "254 characters"
first_name		PERSONS		No	No	2000-12			First Name: 62 characters Contact information limit: First Name: 62 characters	inserted "Contact information limit": "62 characters"
full_name		PERSONS		No	No	N/A
last_name		PERSONS		Yes	Maybe	2000-12			Last Name for Central Contact and Central Contact Backup * (FDAAA) Last Name for Overall Study Officials Contact information limit: Last Name: 62 characters	inserted "Contact information limit": "62 characters"
middle_initial		PERSONS		No	No	2000-12			Middle Initial
name_title		PERSONS		No	Yes	2007-12			Name/Official Title FDAAA - for either the principal investigator or sponsor contact (Limit: 254 characters)	inserted "(Limit: 254 characters)"							Provide the following information for the designated responsible party: o Name/Official Title - for either the principal investigator or sponsor contact	inserted new item "Provide the following information for the designated responsible party: o Name/Official Title - for either the principal investigator or sponsor contact"
nct_id		PERSONS		No	No	N/A
organization		PERSONS		No	Yes	2007-12			Organization FDAAA - the sponsor or the principal investigator's organizational affiliation (Limit: 254 characters) Contact Information FDAAA - [required for internal administrative use only; not revealed to public] provide telephone number and/or email address	under Organization, inserted "(Limit: 254 characters)"					Organization FDAAA - the sponsor or the principal investigator's organizational affiliation Contact Information FDAAA - [required for internal administrative use only; not revealed to public] provide telephone number and/or email address	under Contact Information, changed "for internal administrative use" to "required for internal administrative use"	o Organization - the sponsor or the principal investigator's organizational affiliation o Contact Information - [for internal administrative use only; not revealed to public] provide telephone number and/or email address	inserted new item "o Organization - the sponsor or the principal investigator's organizational affiliation o Contact Information - [for internal administrative use only; not revealed to public] provide telephone number and/or email address"
person_id		PERSONS		No	No	N/A
person_type	person_type_id	PERSONS		No (Overall Study Officials) Yes (Central Contact) No (Central Contact Backup) No (Responsible Party)	No (Overall Study Officials) Maybe (Central Contact) No (Central Contact Backup) Yes (Responsible Party)	2000-12			Overall Study Officials: Person(s) responsible for the overall scientific leadership of the protocol, including study principal investigator._x000D_ _x000D_ Central Contact or Overall Contact (or Facility Contact required): Person providing centralized, coordinated recruitment information for the entire study. * (FDAAA) _x000D_ _x000D_ Central Contact Backup: Person to contact if Central Contact …								Central Contact Definition: Person providing centralized, coordinated recruitment information for the entire study. Central Contact Backup Person to contact if Central Contact is not available. Overall Study Officials Definition: Person(s) responsible for the overall scientific leadership of the protocol, including study principal investigator. Responsible Party Definition: As defined in US Publi…	inserted "Responsible Party Definition: As defined in US Public Law 110-85, Title VIII, Section 801, the term "responsible party", with respect to a clinical trial, means 1. the sponsor of the clinical trial (as defined in 21 CFR 50.3) or 2. the principal investigator of such clinical trial if so designated by a sponsor, grantee, contractor, or awardee, so long as the principal investigator is re…																			Central Contact Definition: Person providing centralized, coordinated recruitment information for the entire study. Central Contact Backup Person to contact if Central Contact is not available. Overall Study Officials Study official information is not required for trials associated with U.S. FDA Investigational New Drug (IND) or Investigational Device Exemption (IDE) applications. Definition: Per…	under Overall Study Officials, inserted "Study official information is not required for trials associated with U.S. FDA Investigational New Drug (IND) or Investigational Device Exemption (IDE) applications." changed "principal investigator" to "study principal investigator"	Central Contact Definition: Person providing centralized, coordinated recruitment information for the entire study. Central Contact Backup Person to contact if Central Contact is not available. Overall Study Officials Definition: Person(s) responsible for the overall scientific leadership of the protocol including principal investigator.	under Overall Study Officials, inserted "including principal investigator"							Central Contact Submission: Required (if a Facility Contact is not provided) Definition: Person providing centralized, coordinated recruitment information for the entire study. Central Contact Backup Submission: Optional Person to contact if Central Contact is not available. Overall Study Officials Submission: Optional Definition: Person(s) responsible for the overall scientific leadership of the…		Central Contact (if desired) Definition: Person providing centralized, coordinated recruitment information for the entire study. Central Contact Backup (if desired) Person to contact if Central Contact is not available. Overall Study Officials (if desired) Definition: Person(s) responsible for the overall scientific leadership of the protocol.
phone		PERSONS		Yes	Maybe	2000-12			Phone * (FDAAA): Toll free phone number of the central contact. person. Use the format 800-555-5555 within the United States and Canada. Otherwise, provide the country code. Contact information limit: Phone: 30 characters	inserted "Contact information limit: 30 characters"							Phone: Toll free phone number of the central contact. person. Use the format 800-555-5555 within the United States and Canada. Otherwise, provide the country code.	changed "Office phone of" to "Toll free phone number of" changed "123-456-7890" to "800-555-5555"	Phone: Office phone of the central contact person. Use the format 123-456-7890 within the United States and Canada. Otherwise, provide the country code.
phone_ext		PERSONS		No	No	2000-12			Ext: phone extension, if needed Contact information limit: Phone Ext: 14 characters	inserted "Contact information limit: 14 characters"	Ext: phone extension, if needed
role	role_id	PERSONS		No	No	2000-12			Official's Role: Position or function of the official. Select one (Study Chair/Study Director/Study Principal Investigator).																												Official's Role: Position or function of the official. Select one (Study Chair/Study Director/Study Principal Investigator).	changed "principal investigator" to "study principal investigator"	Official's Role: Position or function of the official. Select one (Study Chair/Study Director/Principal Investigator).
citation		REFERENCES		No	No	2000-12			References Definition: Citations to publications related to the protocol: background and/or results. Provide either the unique PubMed Identifier (PMID) of an article or enter the full bibliographic citation. Citation Definition: bibliographic reference in NLM's MEDLINE format (Limit: 2000 characters) Example: Barza M; Pavan PR; Doft BH; Wisniewski SR; Wilson LA; Han DP; Kelsey SF. Evaluation of m…	inserted "(Limit: 2000 characters)"																																							References Definition: Citations to publications related to the protocol: background and/or results. Provide either the unique PubMed Identifier (PMID) of an article or enter the full bibliographic citation. Citation Definition: bibliographic reference in NLM's MEDLINE format Example: Barza M; Pavan PR; Doft BH; Wisniewski SR; Wilson LA; Han DP; Kelsey SF: Evaluation of microbiological diagnostic…
nct_id		REFERENCES		No	No	N/A
PMID		REFERENCES		No	No	2000-12			MEDLINE Identifier Definition: unique PubMed Identifier (PMID) for the citation in MEDLINE Example: PMID: 10987815																																						MEDLINE Identifier Submission: Optional Definition: unique PubMed Identifier (PMID) for the citation in MEDLINE Example: PMID: 10987815	changed "MEDLINE PMID" to "MEDLINE Identifier" under Definition, changed "the citation" to "the citation in MEDLINE"	MEDLINE PMID Definition: unique PubMed Identifier (PMID) for the citation Example: PMID: 10987815
reference_id		REFERENCES		No	No	N/A
reference_type		REFERENCES		No	No	2004-10			Reference: Citations to publications related to the protocol: background and/or results. Provide either the unique PubMed Identifier (PMID) of an article or enter the full bibliographic citation. _x000D_ _x000D_ Results Reference: Indicate if the reference provided reports on results from this clinical research study.																														Results Reference? Definition: Indicate if the reference provided reports on results from this clinical research study.	inserted new item "Results Reference? Definition: Indicate if the reference provided reports on results from this clinical research study."
nct_id		SECONDARY_IDS		No	No	N/A
sec_id		SECONDARY_IDS		No	No	N/A
secondary_id		SECONDARY_IDS		No	Yes	2000-12			Secondary IDs FDAAA Definition: Other identification numbers assigned to the protocol, including unique identifiers from other registries and NIH grant numbers, if applicable. (Limit: 30 characters) ID Type Select one. Provide additional information, depending upon selected ID Type, as noted below. (Limit: 119 characters) • US NIH Grant Number - in the Secondary ID field, include activity code, i…	under Secondary IDs, inserted "(Limit: 30 characters)" under ID Type, inserted "(Limit: 119 characters)"	Secondary IDs FDAAA Definition: Other identification numbers assigned to the protocol, including unique identifiers from other registries and NIH grant numbers, if applicable. ID Type Select one. Provide additional information, depending upon selected ID Type, as noted below. • US NIH Grant Number - in the Secondary ID field, include activity code, institute code and 6-digit serial number. Other …	changed "Provide up to 5 Secondary ID Numbers, one per line. Examples: ISRCTN12345678 NCI-793-0115D R01-123456-1 " to "ID Type Select one. Provide additional information, depending upon selected ID Type, as noted below. • US NIH Grant Number - in the Secondary ID field, include activity code, institute code and 6-digit serial number. Other components of the full grant number (type code, support y…					Secondary IDs Definition: Other identification numbers assigned to the protocol, including unique identifiers from other registries and NIH grant numbers, if applicable. Provide up to 5 Secondary ID Numbers, one per line. Examples: ISRCTN12345678 NCI-793-0115D R01-123456-1	changed "including ISRCTN (see http://isrctn.org)" to "including unique identifiers from other registries" inserted "R01-123456-1"															Secondary IDs WHO Definition: Other identification numbers assigned to the protocol, including ISRCTN (see http://isrctn.org) and NIH grant numbers, if applicable. Provide up to 5 Secondary ID Numbers, one per line. Examples: ISRCTN12345678 NCI-793-0115D	changed "any applicable NIH grant numbers" to "including ISRCTN (see http://isrctn.org) and NIH grant numbers, if applicable" changed "Provide up to 5 Secondary ID numbers" to "Provide up to 5 Secondary ID numbers, one per line" inserted one Example, "ISRCTN12345678"															Secondary IDs Definition: Other identification numbers assigned to the protocol, including any applicable NIH grant numbers. Provide up to 5 Secondary ID Numbers. Example: NCI-793-0115D
agency		SPONSORS		Yes	Yes	2000-12			value of sponsor/collaborator
agency_class		SPONSORS		No	No	N/A			Definition not found
nct_id		SPONSORS		No	No	N/A
sponsor_id		SPONSORS		No	No	N/A
sponsor_type		SPONSORS		Yes	Yes	2000-12			Sponsor * FDAAA Definition: Name of primary organization that oversees implementation of study and is responsible for data analysis. For applicable clinical trials, sponsor is defined in 21 CFR 50.3. (Limit: 160 characters) Examples: National Institute of Allergy and Infectious Diseases, Bristol-Myers Squibb Collaborators Definition: Other organizations (if any) providing support, including fundi…	inserted "(Limit 160 characters)"							Sponsor Definition: Name of primary organization that oversees implementation of study and is responsible for data analysis. For applicable clinical trials, sponsor is defined in 21 CFR 50.3. Examples: National Institute of Allergy and Infectious Diseases, Bristol-Myers Squibb Collaborators Definition: Other organizations (if any) providing support, including funding, design, implementation, data…	under Sponsor, inserted "For applicable clinical trials, sponsor is defined in 21 CFR 50.3." under Collaborators, changed "Other organizations providing support" to "Other organizations (if any) providing support"									Sponsor * Definition: Name of primary organization that oversees implementation of study and is responsible for data analysis. Examples: National Institute of Allergy and Infectious Diseases, Bristol-Myers Squibb Collaborators WHO Definition: Other organizations providing support, including funding, design, implementation, data analysis and reporting. The data provider is responsible for confirmi…	under Sponsor, changed "Name of sponsoring organization that takes responsibility for and initiates a clinical investigation" to "Name of primary organization that oversees implementation of study and is responsible for data analysis." under Collaborators, changed "Full names of all organizations co-sponsoring and/or providing financial support for the protocol" to "Other organizations providing …											Sponsor Definition: Name of sponsoring organization that takes responsibility for and initiates a clinical investigation. Examples: National Institute of Allergy and Infectious Diseases, Bristol-Myers Squibb Collaborators Definition: Full names of all organizations co-sponsoring and/or providing financial support for the protocol. The data provider is responsible for confirming all collaborators …	reversed the order of the two Sponsor Examples			Sponsor Submission: Required Definition: Name of sponsoring organization that takes responsibility for and initiates a clinical investigation. Examples: Bristol-Myers Squibb; National Institute of Allergy and Infectious Diseases Collaborators Submission: Optional Definition: Full names of organizations co-sponsoring and/or providing financial support for the protocol. The data provider is respons…	under Collaborators, inserted "The data provider is responsible for confirming all collaborators before listing them." changed "organization" to "organizations"			Sponsor Submission: Required Definition: Name of sponsoring organization that takes responsibility for and initiates a clinical investigation. Examples: Bristol-Myers Squibb; National Institute of Allergy and Infectious Diseases Collaborators Submission: Optional Definition: Full names of organizations co-sponsoring and/or providing financial support for the protocol. Provide up to 10 full names …	changed "who" to "that" changed "Example" to "Examples" inserted additional example: "National Institute of Allergy and Infectious Diseases "
irb_approved		NONE	Old Item: IRB Approved?			2000-12	2001-10		Old Item: IRB Approved?																																								["IRB APPROVED?" item deleted]
medicare_org		NONE	Old Item: Medicare: Organization is Deemed?			2000-12	2001-10		Old Item: Medicare: Organization is Deemed?																																								["Medicare: Organization is Deemed?" item deleted]
medicare_req		NONE	Old Item: Medicare: Study Meets Requirements?			2000-12	2001-10		Old Item: Medicare: Study Meets Requirements?																																								[Item deleted]
accepts_patients		NONE	Old Item: Accepts Patients?			2000-12	2001-12		Old Item: Accepts Patients?																																						[Item deleted]	deleted entire item: "Accepts Patients? Definition: Indicate if persons who have or had the condition(s) being studied or otherwise specified in the eligibility requirements (e.g., specific symptoms), may participate in the study. Select Yes/No."
last_followup_date		NONE	Old Item: Last Follow-up Date			2004-09	2007-09		Old Item: Last Follow-up Date												[Item deleted]	Deleted item: Last Follow-Up Date Definition: Date that the final subject was (or is expected to be) examined or treated. A "Type" menu is also included, with options Anticipated and Actual. For active studies, set Type to Anticipated and specify the expected last follow-up date, updating the date as needed over the course of the study. Upon study completion, change Type to Actual and update the …					Date that last subject was examined or treated. A "Type" menu is also included, with options Anticipated and Actual. For active studies, set Type to Anticipated and specify the expected last follow-up date, updating the date as needed over the course of the study. Upon study completion, change Type to Actual and update the date if necessary.	changed "Date that follow-up with all study participants is complete." to "Date that last subject was examined or treated. A "Type" menu is also included, with options Anticipated and Actual. For active studies, set Type to Anticipated and specify the expected last follow-up date, updating the date as needed over the course of the study. Upon study completion, change Type to Actual and update the…													Last Follow-Up Date Definition: Date that follow-up with all study participants is complete.	inserted new item "Last Follow-Up Date Definition: Date that follow-up with all study participants is complete." NOTE: Moved the contents of Last Follow-Up Date to Study Completion Date as it is called as of 2010-05 release.
last_followup_date_type		NONE	Old Item: Last Follow Up Date Type			2007-04	2007-09		Old Item: Last Follow-up Date Type												[Item deleted]	Deleted item: Last Follow-Up Date Definition: Date that the final subject was (or is expected to be) examined or treated. A "Type" menu is also included, with options Anticipated and Actual. For active studies, set Type to Anticipated and specify the expected last follow-up date, updating the date as needed over the course of the study. Upon study completion, change Type to Actual and update the …					Date that last subject was examined or treated. A "Type" menu is also included, with options Anticipated and Actual. For active studies, set Type to Anticipated and specify the expected last follow-up date, updating the date as needed over the course of the study. Upon study completion, change Type to Actual and update the date if necessary.	changed "Date that follow-up with all study participants is complete." to "Date that last subject was examined or treated. A "Type" menu is also included, with options Anticipated and Actual. For active studies, set Type to Anticipated and specify the expected last follow-up date, updating the date as needed over the course of the study. Upon study completion, change Type to Actual and update the…
data_entry_closure_date		NONE	Old Item: Data Entry Closure Date			2004-09	2007-04		Old Item: Data Entry Closure Date																		[Item deleted]	deleted item: "Data Entry Closure Date Definition: Date that data submission for the study is complete."													Data Entry Closure Date Definition: Date that data submission for the study is complete.	inserted new item under 5. Status between Study Start Date and Study Completion Date
end_date		NONE	Old Item: End Date			N/A	Not Found		Old Item: End Date
delayed_posting		NONE	Non-public item: Delayed Posting?	No	Maybe			2007-12	Delayed Posting? (FDAAA) Definition: If this is a Section 801 applicable clinical trial, indicate whether this trial includes a device NOT previously approved or cleared by the US FDA for any use, as specified in US Public Law 110-85, Title VIII, Section 801. Select Yes/No. If "Yes" is selected, full posting of the trial information on ClinicalTrials.gov will be delayed until after the device has…								Delayed Posting? Definition: If this is a Section 801 applicable clinical trial, indicate whether this trial includes a device NOT previously approved or cleared by the US FDA for any use, as specified in US Public Law 110-85, Title VIII, Section 801. Select Yes/No. If "Yes" is selected, full posting of the trial information on ClinicalTrials.gov will be delayed until after the device has been ap…	inserted new item "Delayed Posting? Definition: If this is a Section 801 applicable clinical trial, indicate whether this trial includes a device NOT previously approved or cleared by the US FDA for any use, as specified in US Public Law 110-85, Title VIII, Section 801. Select Yes/No. If "Yes" is selected, full posting of the trial information on ClinicalTrials.gov will be delayed until after the…
ind_information		NONE	Non-public item: IND/IDE Information	No	No			2000-12	Investigational New Drug Application (IND)/Investigational Device Exemption (IDE) Information: Complete the following only if the protocol involves an Investigational New Drug Application (IND) or Investigational Device Exemption (IDE) under US Food and Drug Administration regulations.								Investigational New Drug Application (IND)/Investigational Device Exemption (IDE) Information: Complete the following only if the protocol involves an Investigational New Drug Application (IND) or Investigational Device Exemption (IDE) under US Food and Drug Administration regulations.	deleted "(Will not be made public - for administrative purposes only.)"																					Investigational New Drug Application (IND)/Investigational Device Exemption (IDE) Informationn: Complete the following only if the protocol involves an Investigational New Drug Application (IND) or Investigational Device Exemption (IDE) under US Food and Drug Administration regulations. (Will not be made public - for administrative purposes only.)	changed 'IND Application Info to IND Application/IDE Info' inserted ") or Investigational Device Exemption (IDE) under US Food and Drug Administration regulations"
ind_protocol		NONE	Non-public item: IND/IDE Protocol?	Yes	Maybe			2000-12	IND/IDE Protocol? * (FDAAA) Definition: Indicate if the protocol involves an Investigational New Drug Application (IND) or Investigational Device Exemption (IDE) under US Food and Drug Administration regulations (Will not be made public - for administrative purposes only.)																														IND/IDE Protocol? Definition: Indicate if the protocol involves an Investigational New Drug Application (IND) or Investigational Device Exemption (IDE) under US Food and Drug Administration regulations(Will not be made public - for administrative purposes only.)	changed "IND" to "IND/IDE" changed "is being conducted under" to "involves" changed "If not, select 'No' and continue" to "or Investigational Device Exemption (IDE) under US Food and Drug Administration regulations"
ind_grantor		NONE	Non-public item: IND/IDE Grantor	Yes	Maybe			2000-12	IND/IDE Grantor * (FDAAA) Definition: FDA center to which the IND or IDE was submitted, i.e., Center for Drug Evaluation and Research (CDER) or Center for Biologics Evaluation and Research (CBER) for INDs; Center for Devices and Radiological Health (CDRH) for IDEs. Select one. (Will not be made public - for administrative purposes only.)																														IND/IDE Grantor Definition: FDA center to which the IND or IDE was submitted, i.e., Center for Drug Evaluation and Research (CDER) or Center for Biologics Evaluation and Research (CBER) for INDs; Center for Devices and Radiological Health (CDRH) for IDEs. Select one. (Will not be made public - for administrative purposes only.)	changed "IND" to "IND/IDE" changed "e.g." to "i.e." inserted "for INDs; Center for Devices and Radiological Health (CDRH) for IDEs."							Submission: Required Definition: FDA center to which the IND was submitted, e.g., Center for Drug Evaluation and Research (CDER) or Center for Biologics Evaluation and Research (CBER). Select one. (Will not be made public - for administrative purposes only.)	changed "i.e." to "e.g."
ind_num		NONE	Non-public item: IND/IDE Number	Yes	Maybe			2000-12	IND/IDE Number * (FDAAA) Definition: Number assigned to an Investigational New Drug Application (IND) or Investigational Device Exemption (IDE). (Will not be made public - for administrative purposes only.) Examples: 22,333; BB1234																														IND/IDE Number Definition: Number assigned to an Investigational New Drug Application (IND) or Investigational Device Exemption (IDE). (Will not be made public - for administrative purposes only.) Examples: 22,333; BB1234	changed "IND" to "IND/IDE" changed "If not yet received, use 'Not Yet Assigned'" to "or Investigational Device Exemption (IDE)."
ind_serial_num		NONE	Non-public item: IND/IDE Serial Number	No	Maybe			2001-12	IND/IDE Serial Number (FDAAA) Definition: Use the serial number from the first submission of the protocol to the IND or IDE. (Will not be made public - for administrative purposes only.)																														IND/IDE Serial Number Definition: Use the serial number from the first submission of the protocol to the IND or IDE. (Will not be made public - for administrative purposes only.)	changed "IND" to "IND/IDE" deleted "The number that appears in section 10 of the FDA Form 1571." changed "IND" to "IND or IDE"	IND Serial Number Definition: The number that appears in section 10 of the FDA Form 1571. Use the serial number from the first submission of the protocol to the IND. (Will not be made public - for administrative purposes only.)	deleted "Submission: Required"					IND Serial Number Submission: Required Definition: The number that appears in section 10 of the FDA Form 1571. Use the serial number from the first submission of the protocol to the IND. (Will not be made public - for administrative purposes only.)	new item for 2001-12
human_sub_review		NONE	Non-public item: Human Subjects Review	No	No			2004-10	Human Subjects Review Submitted studies must have approval from a human subjects review board prior to the recruitment of the first patient. Appropriate review boards include an Institutional Review Board, an ethics committee or an equivalent group that is responsible for review and monitoring of this protocol to protect the rights and welfare of human research subjects. A study may be submitted …						Human Subjects Review Submitted studies must have approval from a human subjects review board prior to the recruitment of the first patient. Appropriate review boards include an Institutional Review Board, an ethics committee or an equivalent group that is responsible for review and monitoring of this protocol to protect the rights and welfare of human research subjects. A study may be submitted …	under Human Subjects Review, changed "studies have" to "studies must have" under Human Subjects Review, inserted "but not required" under Human Subjects Review, inserted "required"	Human Subjects Review Submitted studies have approval from a human subjects review board prior to the recruitment of the first patient. Appropriate review boards include an Institutional Review Board, an ethics committee or an equivalent group that is responsible for review and monitoring of this protocol to protect the rights and welfare of human research subjects. A study may be submitted for r…	changed "Submitted studies must have approval" to "Submitted studies have approval" changed "information is required for internal administrative use" to "information is for internal administrative use"											Human Subjects Review Submitted studies must have approval from a human subjects review board prior to the recruitment of the first patient. Appropriate review boards include an Institutional Review Board, an ethics committee or an equivalent group that is responsible for review and monitoring of this protocol to protect the rights and welfare of human research subjects. A study may be submitted …	under Human Subjects Review, changed "Submitted studies must have approval from a human subjects review board (Board), such as an Institutional Review Board, ethics committee, or equivalent group that is responsible for reviewing and monitoring of human subjects in this protocol." to "Submitted studies must have approval from a human subjects review board prior to the recruitment of the first pat…			Human Subjects Review Submitted studies must have approval from a human subjects review board (Board), such as an Institutional Review Board, ethics committee, or equivalent group that is responsible for reviewing and monitoring of human subjects in this protocol. Review board information is not required for trials associated with U.S. FDA Investigational New Drug (IND) or Investigational Device …	Board Approval Status Definition: Human subjects review board approval status. Select one. • Request not yet submitted: review board approval is required but has not yet been requested • Submitted, pending: review board approval has been requested but not yet granted • Submitted, approved: review board approval has been requested and obtained • Submitted, exempt: review board has granted an exemp…			Human Subjects Review Submitted studies must have approval from a human subjects review board (Board), such as an Institutional Review Board, ethics committee, or equivalent group that is responsible for reviewing and monitoring of human subjects in this protocol. Review board information is not required for trials associated with U.S. FDA Investigational New Drug (IND) or Investigational Device …	changed "Board Approved? Definition: Indicate if the protocol being conducted has been approved by at least one human subjects review board. Provide information on that Board for all remaining data elements." to "Review board information is not required for trials associated with U.S. FDA Investigational New Drug (IND) or Investigational Device Exemption (IDE) applications. Review board informati…	Human Subjects Review Submitted studies must have approval from a human subjects review board (Board), such as an Institutional Review Board, ethics committee, or equivalent group that is responsible for reviewing and monitoring of human subjects in this protocol. Board Approved? Definition: Indicate if the protocol being conducted has been approved by at least one human subjects review board. Pr…	inserted (under new Section #3) "Human Subjects Review Submitted studies must have approval from a human subjects review board (Board), such as an Institutional Review Board, ethics committee, or equivalent group that is responsible for reviewing and monitoring of human subjects in this protocol. Board Approved? Definition: Indicate if the protocol being conducted has been approved by at least on…
board_approval_num		NONE	Non-public item: Board Approval Number	Yes	No			2004-10	Board Approval Number * (required only if status is "Submitted, approved") Definition: Number assigned by the human subjects review board upon approval of the protocol. May be ommitted if status is anything other than approved. If the human subjects review board does not assign numbers, please enter the date of approval in mm/dd/yyyy format.																		Board Approval Number Definition: Number assigned by the human subjects review board upon approval of the protocol. May be ommitted if status is anything other than approved. If the human subjects review board does not assign numbers, please enter the date of approval in mm/dd/yyyy format.	inserted "If the human subjects review board does not assign numbers, please enter the date of approval in mm/dd/yyyy format."					Board Approval Number Definition: Number assigned by the human subjects review board upon approval of the protocol. May be ommitted if status is anything other than approved.	changed "If approval has not yet been granted, enter "Approval Pending" and provide the approval number as soon as it is available." to "May be ommitted if status is anything other than approved."			Board Approval Number Definition: Number assigned by the human subjects review board upon approval of the protocol. If approval has not yet been granted, enter "Approval Pending" and provide the approval number as soon as it is available.	inserted "If approval has not yet been granted, enter "Approval Pending" and provide the approval number as soon as it is available."	Board Approval Number Definition: Number assigned by the human subjects review board upon approval of the protocol.	inserted new item "Board Approval Number Definition: Number assigned by the human subjects review board upon approval of the protocol."
board_name		NONE	Non-public item: Board Name	Yes	No			2004-10	Board Name * (required only if status is "Submitted, approved" or "Submitted, exempt") Definition: Full name of the approving human subjects review board. Example: National Institutes of Health - NCI - IRB #1																														Board Name Definition: Full name of the approving human subjects review board. Example: National Institutes of Health - NCI - IRB #1	inserted new item "Board Name Definition: Full name of the approving human subjects review board. Example: National Institutes of Health - NCI - IRB #1"
board_affiliation		NONE	Non-public item: Board Affiliation	Yes	No			2004-10	Board Affiliation * (required only if status is "Submitted, approved" or "Submitted, exempt") Definition: Official name of organizational affiliation of the approving human subjects review board. (Limit: 255 characters) Example: US National Institutes of Health	inserted "(Limit: 255 characters)"																													Board Affiliation Definition: Official name of organizational affiliation of the approving human subjects review board. Example: US National Institutes of Health	inserted new item "Board Affiliation Definition: Official name of organizational affiliation of the approving human subjects review board. Example: US National Institutes of Health"
board_contact		NONE	Non-public item: Board Contact	Yes	No			2004-10	Board Contact * (required only if status is "Submitted, approved" or "Submitted, exempt") Definition: Contact information for the human subjects review board. • Phone (or Email required): * Use the format 123-456-7890 within the United States and Canada. Otherwise, provide the country code. • Ext: Phone extension, if needed • Email (or Phone required): * Electronic mail address. • Address: Mailin…						Board Contact * (required only if status is "Submitted, approved" or "Submitted, exempt") Definition: Contact information for the human subjects review board. • Phone (or Email required): * Use the format 123-456-7890 within the United States and Canada. Otherwise, provide the country code. • Ext: Phone extension, if needed • Email (or Phone required): * Electronic mail address. • Address: Mailin…	inserted "* (required only if status is "Submitted, approved" or "Submitted, exempt")" under Phone, inserted "(or Email required): *" under Email, inserted "(or Phone required): *"																	Board Contact * Definition: Contact information for the human subjects review board. • Phone: Use the format 123-456-7890 within the United States and Canada. Otherwise, provide the country code. • Ext: Phone extension, if needed • Email: Electronic mail address. • Address: Mailing address for the board, including street address, city, state or province, postal code, and country.	changed "Board Chair" to "Board Contact" changed "Full name of the chairperson or equivalent person responsible" to "Contact information" deleted "• Name: First, middle, last, degrees" deleted "Office phone of the chair." changed "Electronic mail address of the chair" to "Electronic mail address" changed "Mailing address for the chair" to "Mailing address for the board"					Board Chair Definition: Full name of the chairperson or equivalent person responsible for the human subjects review board. • Name: First, middle, last, degrees • Phone: Office phone of the chair. Use the format 123-456-7890 within the United States and Canada. Otherwise, provide the country code. • Ext: Phone extension, if needed • Email: Electronic mail address of the chair. • Address: Mailing a…	inserted new items "Board Chair Definition: Full name of the chairperson or equivalent person responsible for the human subjects review board. • Name: First, middle, last, degrees • Phone: Office phone of the chair. Use the format 123-456-7890 within the United States and Canada. Otherwise, provide the country code. • Ext: Phone extension, if needed • Email: Electronic mail address of the chair. …
[truncated: 6 more columns]

## Sheet: Var History Dates
Variable History Dates
This table includes NLM and FDAAA requirement dates for each variable in ClinicalTrails.gov database. In also includes when a particular variable was last introduced and/or discontinued. Date format = YYYY-MM, so 2008-02 means February, 2008.
Retired Variables are highlighted in green. These are previously used variables which are no longer collected. Historical values not available in current download.
Non-Public Items are highlighted in blue. These are collected variables which are not part of the public dataset.
Variable_Name	Table_Name	Retired_variable_label	NLM_Required	FDAAA_Required	Latest_Intro_date_Variable	Date_Discontinued_Variable	Non_Pub_Latest_Intro_Date_Variable
address_id	ADDRESSES		N/A	N/A	N/A
city	ADDRESSES		Yes	Maybe	2000-12
country	ADDRESSES		Yes	Maybe	2000-12
facility_id	ADDRESSES		N/A	N/A	N/A
nct_id	ADDRESSES		No	No	2000-12
state	ADDRESSES		Yes	Maybe	2000-12
zip	ADDRESSES		No	No	2000-12
arm_group_id	ARM_GROUPS		N/A	N/A	N/A
arm_group_label	ARM_GROUPS		Yes	Maybe	2007-07
arm_group_type	ARM_GROUPS		Yes	Maybe	2007-07
description	ARM_GROUPS		No	Maybe	2007-07
nct_id	ARM_GROUPS		No	No	N/A
authority	AUTHORITIES		Yes	No	2004-10
authority_id	AUTHORITIES		N/A	N/A	N/A
nct_id	AUTHORITIES		No	No	N/A
acronym	CLINICAL_STUDY		No	No	2007-02
biospec_descr	CLINICAL_STUDY		No	No	2007-10
biospec_retention	CLINICAL_STUDY		No	No	2007-10
brief_summary	CLINICAL_STUDY		Yes	Yes	2000-12
brief_title	CLINICAL_STUDY		Yes	Yes	2000-12
completion_date	CLINICAL_STUDY		No	No	2000-12
completion_date_type	CLINICAL_STUDY		No	No	2007-04
criteria	CLINICAL_STUDY		Yes	Yes	2000-12
detailed_description	CLINICAL_STUDY		No	No	2000-12
download_date	CLINICAL_STUDY		No	No	N/A
download_date_dt	CLINICAL_STUDY		No	No	N/A
enrollment	CLINICAL_STUDY		Yes	Yes	2000-12
enrollment_type	CLINICAL_STUDY		Yes	Yes	2007-04
firstreceived_date	CLINICAL_STUDY		No	No	N/A
firstreceived_results_date	CLINICAL_STUDY		No	No	N/A
gender	CLINICAL_STUDY		Yes	Yes	2000-12
has_dmc	CLINICAL_STUDY		No	No	2007-04
has_expanded_access	CLINICAL_STUDY		No	Yes	2007-02
healthy_volunteers	CLINICAL_STUDY		No	Yes	2000-12
is_fda_regulated	CLINICAL_STUDY		No	Maybe	2007-12
is_section_801	CLINICAL_STUDY		No	Maybe	2007-12
lastchanged_date	CLINICAL_STUDY		No	No	N/A
maximum_age	CLINICAL_STUDY		Yes	Yes	2000-12
minimum_age	CLINICAL_STUDY		Yes	Yes	2000-12
nct_alias	CLINICAL_STUDY		No	No	N/A
nct_id	CLINICAL_STUDY		No	No	N/A
number_of_arms	CLINICAL_STUDY		No	Maybe	2007-04
number_of_groups	CLINICAL_STUDY		Yes	No	2000-12
official_title	CLINICAL_STUDY		No	No	2000-12
org_study_id	CLINICAL_STUDY		Yes	Yes	2000-12
overall_status	CLINICAL_STUDY		Yes	Yes	2000-12
phase	CLINICAL_STUDY		Yes	Yes	2000-12
primary_completion_date	CLINICAL_STUDY		No	Yes	2007-12
primary_completion_date_type	CLINICAL_STUDY		No	Yes	2007-12
sampling_method	CLINICAL_STUDY		Yes	No	2007-10
source	CLINICAL_STUDY		No	No	N/A
start_date	CLINICAL_STUDY		No	Yes	2000-12
study_design	CLINICAL_STUDY		Yes (Interventional Study Design) No (Primary Purpose) No (Intervention Model) No (Allocation) No (Study Classification) Yes (Observational Study Model) Yes (Time Perspective)	Maybe (Interventional Study Design) Yes (Primary Purpose) Maybe (Intervention Model) Maybe (Allocation) No (Study Classification) No (Observational Study Model) No (Time Perspective)	2000-12
study_pop	CLINICAL_STUDY		Yes	No	2007-10
study_type	CLINICAL_STUDY		Yes	Yes	2000-12
verification_date	CLINICAL_STUDY		Yes	Yes	2001-10
why_stopped	CLINICAL_STUDY		No	No	2007-04
condition	CONDITIONS		Yes	Yes	2000-12
condition_id	CONDITIONS		N/A	N/A	N/A
nct_id	CONDITIONS		No	No	N/A
mesh_condition_id	CONDITION_BROWSE		N/A	N/A	N/A
mesh_term	CONDITION_BROWSE		No	No	N/A
nct_id	CONDITION_BROWSE		No	No	2000-12
design_id	DESIGNS		N/A	N/A	N/A
design_name	DESIGNS		Yes (Interventional Study Design) No (Primary Purpose) No (Intervention Model) No (Allocation) No (Study Classification) Yes (Observational Study Model) Yes (Time Perspective)	Maybe (Interventional Study Design) Yes (Primary Purpose) Maybe (Intervention Model) Maybe (Allocation) No (Study Classification) No (Observational Study Model) No (Time Perspective)	2000-12
design_value	DESIGNS		Yes (Interventional Study Design) No (Primary Purpose) No (Intervention Model) No (Allocation) No (Study Classification) Yes (Observational Study Model) Yes (Time Perspective)	Maybe (Interventional Study Design) Yes (Primary Purpose) Maybe (Intervention Model) Maybe (Allocation) No (Study Classification) No (Observational Study Model) No (Time Perspective)	2000-12
masked_role	DESIGNS		No	Maybe	2000-12
nct_id	DESIGNS		No	No	N/A
facility_id	FACILITIES		N/A	N/A	N/A
location_id	FACILITIES		N/A	N/A	N/A
name	FACILITIES		Yes	Maybe	2000-12
nct_id	FACILITIES		No	No	N/A
arm_group_label	INTERVENTION_ARM_GROUPS		Yes	Maybe	2007-07
int_arm_group_id	INTERVENTION_ARM_GROUPS		N/A	N/A	N/A
intervention_id	INTERVENTION_ARM_GROUPS		N/A	N/A	N/A
nct_id	INTERVENTION_ARM_GROUPS		No	No	N/A
int_other_name_id	INTERVENTION_OTHER_NAMES		N/A	N/A	N/A
intervention_id	INTERVENTION_OTHER_NAMES		N/A	N/A	N/A
nct_id	INTERVENTION_OTHER_NAMES		No	No	N/A
other_name	INTERVENTION_OTHER_NAMES		No	No	2007-07
description	INTERVENTIONS		No	Maybe	2007-07
intervention_id	INTERVENTIONS		N/A	N/A	N/A
intervention_name	INTERVENTIONS		Yes	Yes	2000-12
intervention_type	INTERVENTIONS		Yes	Yes	2000-12
nct_id	INTERVENTIONS		No	No	N/A
mesh_intervention_id	INTERVENTION_BROWSE		N/A	N/A	N/A
mesh_term	INTERVENTION_BROWSE		No	No	N/A
nct_id	INTERVENTION_BROWSE		No	No	2000-12
keyword	KEYWORDS		No	No	2000-12
keyword_id	KEYWORDS		N/A	N/A	N/A
nct_id	KEYWORDS		No	No	N/A
description	LINKS		No	No	2000-12
link_id	LINKS		N/A	N/A	N/A
nct_id	LINKS		No	No	N/A
url	LINKS		No	No	2000-12
degrees	LOCATION_CONTACTS		No	No	2000-12
email	LOCATION_CONTACTS		Yes	Maybe	2000-12
first_name	LOCATION_CONTACTS		No	No	2000-12
full_name	LOCATION_CONTACTS		No	No	N/A
last_name	LOCATION_CONTACTS		Yes	Maybe	2000-12
location_contact_id	LOCATION_CONTACTS		N/A	N/A	N/A
location_id	LOCATION_CONTACTS		N/A	N/A	N/A
middle_initial	LOCATION_CONTACTS		No	No	2000-12
nct_id	LOCATION_CONTACTS		No	No	N/A
person_type	LOCATION_CONTACTS		Yes	Maybe	2000-12
phone	LOCATION_CONTACTS		Yes	Maybe	2000-12
phone_ext	LOCATION_CONTACTS		No	No	2000-12
role	LOCATION_CONTACTS		No	No	2000-12
location_id	LOCATIONS		N/A	N/A	N/A
nct_id	LOCATIONS		No	No	N/A
status	LOCATIONS		Yes	Yes	2000-12
mesh_id	MESH_TREES		N/A	N/A	N/A
mesh_term	MESH_TREES		No	No	N/A
mesh_tree_id	MESH_TREES		N/A	N/A	N/A
mesh_type	MESH_TREES		No	No	N/A
nct_id	MESH_TREES		No	No	N/A
node_name	MESH_TREES		No	No	N/A
node_value	MESH_TREES		No	No	N/A
mesh_id	MESH_TREES_RAW		N/A	N/A	N/A
mesh_term	MESH_TREES_RAW		No	No	N/A
description	OUTCOMES		No	No	2010-02
measure	OUTCOMES		Yes	No	2000-12
nct_id	OUTCOMES		No	No	N/A
outcome_id	OUTCOMES		N/A	N/A	N/A
safety_issue	OUTCOMES		No	Maybe	2007-12
time_frame	OUTCOMES		No	Maybe	2007-12
type	OUTCOMES		No	Yes	2004-09
affiliation	PERSONS		No	No	2000-12
degrees	PERSONS		No	No	2000-12
email	PERSONS		Yes	Maybe	2000-12
first_name	PERSONS		No	No	2000-12
full_name	PERSONS		No	No	N/A
last_name	PERSONS		Yes	Maybe	2000-12
middle_initial	PERSONS		No	No	2000-12
name_title	PERSONS		No	Yes	2007-12
nct_id	PERSONS		No	No	N/A
organization	PERSONS		No	Yes	2007-12
person_id	PERSONS		N/A	N/A	N/A
person_type	PERSONS		No (Overall Study Officials) Yes (Central Contact) No (Central Contact Backup) No (Responsible Party)	No (Overall Study Officials) Maybe (Central Contact) No (Central Contact Backup) Yes (Responsible Party)	2000-12
phone	PERSONS		Yes	Maybe	2000-12
phone_ext	PERSONS		No	No	2000-12
role	PERSONS		No	No	2000-12
citation	REFERENCES		No	No	2000-12
nct_id	REFERENCES		No	No	N/A
PMID	REFERENCES		No	No	2000-12
reference_id	REFERENCES		N/A	N/A	N/A
reference_type	REFERENCES		No	No	2004-10
nct_id	SECONDARY_IDS		No	No	N/A
sec_id	SECONDARY_IDS		N/A	N/A	N/A
secondary_id	SECONDARY_IDS		No	Yes	2000-12
agency	SPONSORS		Yes	Yes	2000-12
agency_class	SPONSORS		No	No	N/A
nct_id	SPONSORS		No	No	N/A
sponsor_id	SPONSORS		N/A	N/A	N/A
sponsor_type	SPONSORS		Yes	Yes	2000-12
irb_approved	NONE	Old Item: IRB Approved?			2000-12	2001-10
medicare_org	NONE	Old Item: Medicare: Organization is Deemed?			2000-12	2001-10
medicare_req	NONE	Old Item: Medicare: Study Meets Requirements?			2000-12	2001-10
accepts_patients	NONE	Old Item: Accepts Patients?			2000-12	2001-12
last_followup_date	NONE	Old Item: Last Follow-up Date			2004-09	2007-09
last_followup_date_type	NONE	Old Item: Last Follow Up Date Type			2007-04	2007-09
data_entry_closure_date	NONE	Old Item: Data Entry Closure Date			2004-09	2007-04
end_date	NONE	Old Item: End Date			N/A	Not Found
delayed_posting	NONE	Non-public item: Delayed Posting?	No	Maybe			2007-12
ind_information	NONE	Non-public item: IND/IDE Information	No	No			2000-12
ind_protocol	NONE	Non-public item: IND/IDE Protocol?	Yes	Maybe			2000-12
ind_grantor	NONE	Non-public item: IND/IDE Grantor	Yes	Maybe			2000-12
ind_num	NONE	Non-public item: IND/IDE Number	Yes	Maybe			2000-12
ind_serial_num	NONE	Non-public item: IND/IDE Serial Number	No	Maybe			2001-12
human_sub_review	NONE	Non-public item: Human Subjects Review	No	No			2004-10
board_approval_num	NONE	Non-public item: Board Approval Number	Yes	No			2004-10
board_name	NONE	Non-public item: Board Name	Yes	No			2004-10
board_affiliation	NONE	Non-public item: Board Affiliation	Yes	No			2004-10
board_contact	NONE	Non-public item: Board Contact	Yes	No			2004-10

## Sheet: Var_History_Text
ClinicalTrials.gov - Data Element Definitions History													ClinicalTrials.gov - Data Element Definitions History													ClinicalTrials.gov - Data Element Definitions History													ClinicalTrials.gov - Data Element Definitions History
This document tracks changes made to ‘ClinicalTrials.gov Protocol Data Element Definitions’ released by NLM from December 2000 until May 2010. Two columns are added for each ClinicalTrials.gov Definitions release. The first column displays definitions corresponding to a given variable; the second displays the changes compared to the previous release. Columns are ordered reverse chronologically fr…													This document tracks changes made to ‘ClinicalTrials.gov Protocol Data Element Definitions’ released by NLM from December 2000 until May 2010. Two columns are added for each ClinicalTrials.gov Definitions release. The first column displays definitions corresponding to a given variable; the second displays the changes compared to the previous release. Columns are ordered reverse chronologically fr…													This document tracks changes made to ‘ClinicalTrials.gov Protocol Data Element Definitions’ released by NLM from December 2000 until May 2010. Two columns are added for each ClinicalTrials.gov Definitions release. The first column displays definitions corresponding to a given variable; the second displays the changes compared to the previous release. Columns are ordered reverse chronologically fr…													This document tracks changes made to ‘ClinicalTrials.gov Protocol Data Element Definitions’ released by NLM from December 2000 until May 2010. Two columns are added for each ClinicalTrials.gov Definitions release. The first column displays definitions corresponding to a given variable; the second displays the changes compared to the previous release. Columns are ordered reverse chronologically fr…
Old Variables are highlighted in green													Old Variables are highlighted in green													Old Variables are highlighted in green													Old Variables are highlighted in green
Non-Public Items are highlighted in blue													Non-Public Items are highlighted in blue													Non-Public Items are highlighted in blue													Non-Public Items are highlighted in blue
Variable_Name	Table_Name	Variable_Label	Definitions-2010-05CurrentRelease	Change made for 2010-05	Definitions-2010-02	Change made for 2010-02	Definitions-2008-08	Change made for 2008-08	Definitions-2008-02	Change made for 2008-02	Definitions-2007-12	Change made for 2007-12	Definitions-2007-10	Change made for 2007-10	Definitions-2007-09	Change made for 2007-09	Definitions-2007-08	Change made for 2007-08	Definitions-2007-07	Change made for 2007-07	Definitions-2007-04	Change made for 2007-04	Definitions-2007-02	Change made for 2007-02	Definitions-2006-09	Change made for 2006-09	Definitions-2006-07	Change made for 2006-07	Definitions-2005-08	Change made for 2005-08	Definitions-2005-07	Change made for 2005-07	Definitions-2004-10	Change made for 2004-10	Definitions-2004-09	Change made for 2004-09	Definitions-2002-08	Change made for 2002-08	Definitions-2002-04	Change made for 2002-04	Definitions-2001-12	Change made for 2001-12	Definitions-2001-10	Change made for 2001-10	Definitions-2001-06	Change made for 2001-06	Definitions-2001-05	Change made for 2001-05	Definitions-2000-12-InitialRelease
address_id	ADDRESSES
city	ADDRESSES	City	City * (FDAAA)						City * (FDAAA)	inserted "* (FDAAA)"	City																																						City
country	ADDRESSES	Country	Country * (FDAAA)						Country * (FDAAA)	inserted "* (FDAAA)"	Country																																						Country
facility_id	ADDRESSES
nct_id	ADDRESSES	ClinicalTrials.gov registry number
state	ADDRESSES	State	State/Province * (FDAAA)						State/Province * (FDAAA)	inserted "* (FDAAA)"	State/Province																																						State/Province
zip	ADDRESSES	Zip	Postal Code																																														Postal Code
arm_group_id	ARM_GROUPS
arm_group_label	ARM_GROUPS	Arm or Group Label	For interventional studies specify the arms, corresponding to Number of Arms specified under Study Design (for single-arm studies, the following data elements are optional). Arm Label * (FDAAA) - the short name used to identify the arm. (Limit: 62 characters) Examples: • Metformin • Lifestyle counseling • Sugar pill For observational studies specify the predefined participant groups (cohorts) to …	under Arm instruction, inserted "corresponding to Number of Arms specified under Study Design (for single-arm studies, the following data elements are optional)." under Arm Label, inserted "(Limit: 62 characters)" under Group instruction, inserted ", corresponding to Number of Groups specified under Study Design (for single-group studies, the following data elements are optional)." under Group La…			For interventional studies specify the arms: Arm Label * (FDAAA) - the short name used to identify the arm. Examples: • Metformin • Lifestyle counseling • Sugar pill For observational studies specify the predefined participant groups (cohorts) to be studied. Do not use this section to specify strata (Detailed Design can be used for that purpose, if desired). Group/Cohort Label * - the short name …	changed "Arm Number or Label" to "Arm Label" under Arm Label, changed "the number, letter or name" to "the short name" under Arm Label Examples, changed "A, 2, III" to "• Metformin • Lifestyle counseling • Sugar pill" changed "Group/Cohort Number or Label" to "Group/Cohort Label" under Group/Cohort Label, changed "the number, letter or name" to "the short name" under Group/Cohort Label Examples, …	For interventional studies specify the arms: Arm Number or Label * (FDAAA) - the number, letter or name used to identify the arm. Examples: A, 2, III For observational studies specify the predefined participant groups (cohorts) to be studied. Do not use this section to specify strata (Detailed Design can be used for that purpose, if desired). Group/Cohort Number or Label * - the number, letter or…	under Arm Number or Label, inserted "* (FDAAA)" under Group/Cohort Number or Label, inserted "*"			For interventional studies specify the arms: Arm Number or Label - the number, letter or name used to identify the arm. Examples: A, 2, III For observational studies specify the predefined participant groups (cohorts) to be studied. Do not use this section to specify strata (Detailed Design can be used for that purpose, if desired). Group/Cohort Number or Label - the number, letter or name used t…	changed "For observational studies specify the groups to be studied: Group Number or Label - the number, letter or name used to identify the group. Examples: A, 2, III" to "For observational studies specify the predefined participant groups (cohorts) to be studied. Do not use this section to specify strata (Detailed Design can be used for that purpose, if desired). Group/Cohort Number or Label - …					For interventional studies specify the arms: Arm Number or Label - the number, letter or name used to identify the arm. Examples: A, 2, III For observational studies specify the groups to be studied: Group Number or Label - the number, letter or name used to identify the group. Examples: A, 2, III	inserted new item "For interventional studies specify the arms: Arm Number or Label - the number, letter or name used to identify the arm. Examples: A, 2, III For observational studies specify the groups to be studied: Group Number or Label - the number, letter or name used to identify the group. Examples: A, 2, III"
arm_group_type	ARM_GROUPS	Arm or Group Type	Arm Type * (FDAAA) - select one Experimental Active Comparator Placebo Comparator Sham Comparator No intervention Other						Arm Type * (FDAAA) - select one • Experimental • Active Comparator • Placebo Comparator • Sham Comparator • No intervention • Other	inserted "* (FDAAA)"									Arm Type - select one • Experimental • Active Comparator • Placebo Comparator • Sham Comparator • No intervention • Other Group Type - select one • Case • Control • Treatment Comparison • Exposure Comparison • Other	inserted new item "Arm Type - select one • Experimental • Active Comparator • Placebo Comparator • Sham Comparator • No intervention • Other Group Type - select one • Case • Control • Treatment Comparison • Exposure Comparison • Other"
description	ARM_GROUPS	Arm or Group Description	Arm Description (FDAAA) - brief description of the arm. This element may not be necessary if the associated intervention descriptions contain sufficient information to describe the arm. (Limit: 999 characters) Group/Cohort Description Definition: Explanation of the nature of the study group (e.g., those with a condition and those without a condition; those with an exposure and those without an ex…	under Arm Description, inserted "(Limit: 999 characters)" under Group/Cohort Description, inserted "(Limit: 1000 characters)"					Arm Description (FDAAA) - brief description of the arm. This element may not be necessary if the associated intervention descriptions contain sufficient information to describe the arm. Group/Cohort Description Definition: Explanation of the nature of the study group (e.g., those with a condition and those without a condition; those with an exposure and those without an exposure). Note that the o…	under Arm Description, inserted "(FDAAA)"	Arm Description - brief description of the arm. This element may not be necessary if the associated intervention descriptions contain sufficient information to describe the arm. Group/Cohort Description Definition: Explanation of the nature of the study group (e.g., those with a condition and those without a condition; those with an exposure and those without an exposure). Note that the overall s…	under Arm Description, changed "may be omitted" to "may not be necessary"	Arm Description - brief description of the arm. This element may be omitted if the associated intervention descriptions contain sufficient information to describe the arm. Group/Cohort Description Definition: Explanation of the nature of the study group (e.g., those with a condition and those without a condition; those with an exposure and those without an exposure). Note that the overall study p…	changed "Group Description - brief description of the subject group" to "Group/Cohort Description Definition: Explanation of the nature of the study group (e.g., those with a condition and those without a condition; those with an exposure and those without an exposure). Note that the overall study population should be described under Eligibility."					Arm Description - brief description of the arm. This element may be omitted if the associated intervention descriptions contain sufficient information to describe the arm. Group Description - brief description of the subject group	inserted new item "Arm Description - brief description of the arm. This element may be omitted if the associated intervention descriptions contain sufficient information to describe the arm. Group Description - brief description of the subject group"
nct_id	ARM_GROUPS	ClinicalTrials.gov registry number
authority	AUTHORITIES	Oversight Authorities	Oversight authority information is displayed on ClinicalTrials.gov. For IND/IDE protocols, Oversight Authority is filled in automatically with "United States: Food and Drug Administration." Oversight Authorities * Definition: The name of each national or international health organization with authority over the protocol. Use the following format for each authority: country: organization name Exam…						Oversight authority information is displayed on ClinicalTrials.gov. For IND/IDE protocols, Oversight Authority is filled in automatically with "United States: Food and Drug Administration." Oversight Authorities * Definition: The name of each national or international health organization with authority over the protocol. Use the following format for each authority: country: organization name Exam…	inserted "For IND/IDE protocols, Oversight Authority is filled in automatically with "United States: Food and Drug Administration."" inserted "*"	Oversight authority information is displayed on ClinicalTrials.gov. Oversight Authorities Definition: The name of each national or international health organization with authority over the protocol. Use the following format for each authority: country: organization name Examples: United States: Institutional Review Board United States: Food and Drug Administration Germany: Federal Institute for D…	deleted "*"															Oversight authority information is displayed on ClinicalTrials.gov. Oversight Authorities * Definition: The name of each national or international health organization with authority over the protocol. Use the following format for each authority: country: organization name Examples: United States: Institutional Review Board United States: Food and Drug Administration Germany: Federal Institute for…	under Examples, inserted "United States: Institutional Review Board"	Oversight authority information is displayed on ClinicalTrials.gov. Oversight Authorities * Definition: The name of each national or international health organization with authority over the protocol. Use the following format for each authority: country: organization name Example: United States: Food and Drug Administration Germany: Federal Institute for Drugs and Medical Devices Australia: Thera…	inserted "*"	Oversight authority information is displayed on ClinicalTrials.gov. Oversight Authorities Definition: The name of each national or international health organization with authority over the protocol. Use the following format for each authority: country: organization name Example: United States: Food and Drug Administration Germany: Federal Institute for Drugs and Medical Devices Australia: Therape…	inserted "Oversight authority information is displayed on ClinicalTrials.gov."	Oversight Authorities Definition: The name of each national or international health organization with authority over the protocol. Use the following format for each authority: country: organization name Example: United States: Food and Drug Administration Germany: Federal Institute for Drugs and Medical Devices Australia: Therapeutic Goods Administration	inserted new item "Oversight Authorities Definition: The name of each national or international health organization with authority over the protocol. Use the following format for each authority: country: organization name Example: United States: Food and Drug Administration Germany: Federal Institute for Drugs and Medical Devices Australia: Therapeutic Goods Administration"
authority_id	AUTHORITIES
nct_id	AUTHORITIES	ClinicalTrials.gov registry number
acronym	CLINICAL_STUDY	Acronym	Acronym Definition: Acronym or initials used to identify this study, if applicable. Enter only the acronym. If supplied, the acronym is automatically displayed in parentheses following the brief title. (Limit: 14 characters) Example: Brief Title: Women's Health Initiative Acronym: WHI Displayed on ClinicalTrials.gov as: Women's Health Initiative (WHI)	inserted "(Limit: 14 characters)"																			Acronym Definition: Acronym or initials used to identify this study, if applicable. Enter only the acronym. If supplied, the acronym is automatically displayed in parentheses following the brief title. Example: Brief Title: Women's Health Initiative Acronym: WHI Displayed on ClinicalTrials.gov as: Women's Health Initiative (WHI)	inserted new item "Acronym Definition: Acronym or initials used to identify this study, if applicable. Enter only the acronym. If supplied, the acronym is automatically displayed in parentheses following the brief title. Example: Brief Title: Women's Health Initiative Acronym: WHI Displayed on ClinicalTrials.gov as: Women's Health Initiative (WHI)"
biospec_descr	CLINICAL_STUDY	Biospecimen Description	Biospecimen Description Definition: Specify all types of biospecimens to be retained (e.g., whole blood, serum, white cells, urine, tissue). (Limit: 1000 characters)	inserted "(Limit: 1000 characters) "			Biospecimen Description Definition: Specify all types of biospecimens to be retained (e.g., whole blood, serum, white cells, urine, tissue).	deleted "*"	Biospecimen Description * Definition: Specify all types of biospecimens to be retained (e.g., whole blood, serum, white cells, urine, tissue).	inserted "*"			Biospecimen Description Definition: Specify all types of biospecimens to be retained (e.g., whole blood, serum, white cells, urine, tissue).	inserted new item "Biospecimen Description Definition: Specify all types of biospecimens to be retained (e.g., whole blood, serum, white cells, urine, tissue)."
biospec_retention	CLINICAL_STUDY	Biospecimen Retention	Biospecimen Retention - select one • None Retained - no samples retained • Samples With DNA - samples retained, with potential for extraction of DNA from at least one of the types of samples retained (e.g., frozen tissue, whole blood) • Samples Without DNA - samples retained, with no potential for DNA extraction from any retained samples (e.g., fixed tissue, plasma)				Biospecimen Retention - select one • None Retained - no samples retained • Samples With DNA - samples retained, with potential for extraction of DNA from at least one of the types of samples retained (e.g., frozen tissue, whole blood) • Samples Without DNA - samples retained, with no potential for DNA extraction from any retained samples (e.g., fixed tissue, plasma)	deleted "*"	Biospecimen Retention * - select one • None Retained - no samples retained • Samples With DNA - samples retained, with potential for extraction of DNA from at least one of the types of samples retained (e.g., frozen tissue, whole blood) • Samples Without DNA - samples retained, with no potential for DNA extraction from any retained samples (e.g., fixed tissue, plasma)	inserted "*"			Biospecimen Retention - select one • None Retained - no samples retained • Samples With DNA - samples retained, with potential for extraction of DNA from at least one of the types of samples retained (e.g., frozen tissue, whole blood) • Samples Without DNA - samples retained, with no potential for DNA extraction from any retained samples (e.g., fixed tissue, plasma)	inserted new item "Biospecimen Retention - select one • None Retained - no samples retained • Samples With DNA - samples retained, with potential for extraction of DNA from at least one of the types of samples retained (e.g., frozen tissue, whole blood) • Samples Without DNA - samples retained, with no potential for DNA extraction from any retained samples (e.g., fixed tissue, plasma)"
brief_summary	CLINICAL_STUDY	Brief Summary	Brief Summary * FDAAA Definition: Short description of the protocol intended for the lay public. Include a brief statement of the study hypothesis. (Limit: 5000 characters) Example: The purpose of this study is to determine whether prednisone, methotrexate, and cyclophosphamide are effective in the treatment of rapidly progressive hearing loss in both ears due to autoimmune inner ear disease (AIE…	inserted "(Limit: 5000 characters)"					Brief Summary * FDAAA Definition: Short description of the protocol intended for the lay public. Include a brief statement of the study hypothesis. Example: The purpose of this study is to determine whether prednisone, methotrexate, and cyclophosphamide are effective in the treatment of rapidly progressive hearing loss in both ears due to autoimmune inner ear disease (AIED).	inserted "* FDAAA"	Brief Summary Definition: Short description of the protocol intended for the lay public. Include a brief statement of the study hypothesis. Example: The purpose of this study is to determine whether prednisone, methotrexate, and cyclophosphamide are effective in the treatment of rapidly progressive hearing loss in both ears due to autoimmune inner ear disease (AIED).	deleted "*" changed "description of the primary purpose of the protocol" to "description of the protocol"																	Study Description Brief Summary * Definition: Short description of the primary purpose of the protocol intended for the lay public. Include a brief statement of the study hypothesis. Example: The purpose of this study is to determine whether prednisone, methotrexate, and cyclophosphamide are effective in the treatment of rapidly progressive hearing loss in both ears due to autoimmune inner ear di…	inserted "*"	Study Description Brief Summary Definition: Short description of the primary purpose of the protocol intended for the lay public. Include a brief statement of the study hypothesis. Example: The purpose of this study is to determine whether prednisone, methotrexate, and cyclophosphamide are effective in the treatment of rapidly progressive hearing loss in both ears due to autoimmune inner ear dise…	inserted "Include a brief statement of the study hypothesis. "			4Study Description Brief Summary Definition: Short description of the primary purpose of the protocol intended for the lay public. Example: The purpose of this study is to determine whether prednisone, methotrexate, and cyclophosphamide are effective in the treatment of rapidly progressive hearing loss in both ears due to autoimmune inner ear disease (AIED).	deleted "Submission: Required"					Study Description Brief Summary Submission: Required Definition: Short description of the primary purpose of the protocol intended for the lay public. Example: The purpose of this study is to determine whether prednisone, methotrexate, and cyclophosphamide are effective in the treatment of rapidly progressive hearing loss in both ears due to autoimmune inner ear disease (AIED).	inserted "Submission: Required" changed "description of the purpose" to "description of the primary purpose" changed "sensorineural hearing loss in both ears" to "hearing loss in both ears due to autoimmune inner ear disease (AIED)" deleted "This condition is called autoimmune inner ear disease (AIED) because it is thought that the hearing loss is triggered by an autoimmune process. Treatment att…			Brief Summary Definition: Short description of the purpose of the protocol intended for the lay public. Example: The purpose of this study is to determine whether prednisone, methotrexate, and cyclophosphamide are effective in the treatment of rapidly progressive sensorineural hearing loss in both ears. This condition is called autoimmune inner ear disease (AIED) because it is thought that the he…	changed "groups testing the experimental use of drugs" to "groups to evaluate the use of the drugs"	Brief Summary Definition: Short description of the purpose of the protocol intended for the lay public. Example: The purpose of this study is to determine whether prednisone, methotrexate, and cyclophosphamide are effective in the treatment of rapidly progressive sensorineural hearing loss in both ears. This condition is called autoimmune inner ear disease (AIED), because it is thought that the h…	changed "consumer use" to "the lay public"	Study Description Brief Summary Definition: Short description of the purpose of the protocol intended for consumer use. Example: The purpose of this study is to determine whether prednisone, methotrexate, and cyclophosphamide are effective in the treatment of rapidly progressive sensorineural hearing loss in both ears. This condition is called autoimmune inner ear disease (AIED), because it is th…
brief_title	CLINICAL_STUDY	Brief Title	Brief Title * FDAAA Definition: Protocol title intended for the lay public. (Limit: 300 characters) Example: Safety Study of Recombinant Vaccinia Virus Vaccine to Treat Prostate Cancer	inserted "(Limit: 300 characters)"					Brief Title * FDAAA Definition: Protocol title intended for the lay public. Example: Safety Study of Recombinant Vaccinia Virus Vaccine to Treat Prostate Cancer	inserted "* FDAAA"	Brief Title Definition: Protocol title intended for the lay public. Example: Safety Study of Recombinant Vaccinia Virus Vaccine to Treat Prostate Cancer	deleted "*"																	Brief Title * Definition: Protocol title intended for the lay public. Example: Safety Study of Recombinant Vaccinia Virus Vaccine to Treat Prostate Cancer	inserted "*"					Brief Title Definition: Protocol title intended for the lay public. Example: Safety Study of Recombinant Vaccinia Virus Vaccine to Treat Prostate Cancer	deleted "Submission: Required"					Brief Title Submission: Required Definition: Protocol title intended for the lay public. Example: Safety Study of Recombinant Vaccinia Virus Vaccine to Treat Prostate Cancer	inserted "Submission: Required"			Brief Title Definition: Protocol title intended for the lay public. Example: Safety Study of Recombinant Vaccinia Virus Vaccine to Treat Prostate Cancer	deleted "Short" changed example from "Effect of Pregnancy on Uveitis" to "Safety Study of Recombinant Vaccinia Virus Vaccine to Treat Prostate Cancer"	Brief Title Definition: Short protocol title intended for the lay public. Example: Effect of Pregnancy on Uveitis	deleted "consumers" inserted "the lay public"	Brief Title Definition: Short protocol title intended for consumers. Example: Effect of Pregnancy on Uveitis
completion_date	CLINICAL_STUDY	Study Completion Date	Study Completion Date Definition: Final date on which data was (or is expected to be) collected.								Study Completion Date Definition: Final date on which data was (or is expected to be) collected.	changed "Completion Date" to "Study Completion Date"			Completion Date Definition: Final date on which data was (or is expected to be) collected.	changed "Last Follow-Up Date Definition: Date that the final subject was (or is expected to be) examined or treated. " to "Completion Date Definition: Final date on which data was (or is expected to be) collected. "			Last Follow-Up Date Definition: Date that the final subject was (or is expected to be) examined or treated.	changed "Date that last subject was examined or treated" to "Date that the final subject was (or is expected to be) examined or treated"	Last Follow-Up Date Definition: Date that last subject was examined or treated.	changed "Last Follow-Up Date Definition: Date that follow-up with all study participants is complete." to "Last Follow-Up Date Definition: Date that last subject was examined or treated. "													Study Completion Date Definition: Expected or actual date that analysis is concluded for the protocol.	changed "Completion Date" to "Study Completion Date" deleted "Submission: Optional" changed "actual completion date of the protocol" to "actual date that analysis is concluded for the protocol" NOTE: Moved the contents of Last Follow-Up Date to Study Completion Date as it is called as of 2010-05 release.					Completion Date Submission: Optional Definition: Expected or actual completion date of the protocol.	changed "(if desired)" to Submission: Optional"					Completion Date (if desired) Definition: Expected or actual completion date of the protocol.	inserted "(if desired)"	Completion Date Definition: Expected or actual completion date of the protocol.
completion_date_type	CLINICAL_STUDY	Study Completion Date Type	Use the Type menu (Anticipated/Actual) as described above. [A "Type" menu is also included, with options Anticipated and Actual. For active studies, set Type to Anticipated and specify the expected completion date, updating the date as needed over the course of the study. Upon study completion, change Type to Actual and update the date if necessary. ]												A "Type" menu is also included, with options Anticipated and Actual. For active studies, set Type to Anticipated and specify the expected completion date, updating the date as needed over the course of the study. Upon study completion, change Type to Actual and update the date if necessary.	changed "A "Type" menu is also included, with options Anticipated and Actual. For active studies, set Type to Anticipated and specify the expected last follow-up date" to "A "Type" menu is also included, with options Anticipated and Actual. For active studies, set Type to Anticipated and specify the expected completion date"					A "Type" menu is also included, with options Anticipated and Actual. For active studies, set Type to Anticipated and specify the expected last follow-up date, updating the date as needed over the course of the study. Upon study completion, change Type to Actual and update the date if necessary.	inserted new item: "A "Type" menu is also included, with options Anticipated and Actual. For active studies, set Type to Anticipated and specify the expected last follow-up date, updating the date as needed over the course of the study. Upon study completion, change Type to Actual and update the date if necessary."
criteria	CLINICAL_STUDY	Eligibility Criteria	Eligibility Criteria * FDAAA Definition: Summary criteria for participant selection. The preferred format includes lists of inclusion and exclusion criteria as shown below. (Limit: 15,000 characters) Example: Inclusion Criteria: - Clinical diagnosis of Alzheimer's Disease - Must be able to swallow tablets Exclusion Criteria: - Insulin dependent diabetes - Thyroid disease	inserted "(Limit: 15,000 characters)"					Eligibility Criteria * FDAAA Definition: Summary criteria for participant selection. The preferred format includes lists of inclusion and exclusion criteria as shown below. Example: Inclusion Criteria: - Clinical diagnosis of Alzheimer's Disease - Must be able to swallow tablets Exclusion Criteria: - Insulin dependent diabetes - Thyroid disease	inserted "* FDAAA"	Eligibility Criteria Definition: Summary criteria for participant selection. The preferred format includes lists of inclusion and exclusion criteria as shown below. Example: Inclusion Criteria: - Clinical diagnosis of Alzheimer's Disease - Must be able to swallow tablets Exclusion Criteria: - Insulin dependent diabetes - Thyroid disease	deleted "*"					Eligibility Criteria * Definition: Summary criteria for participant selection. The preferred format includes lists of inclusion and exclusion criteria as shown below. Example: Inclusion Criteria: - Clinical diagnosis of Alzheimer's Disease - Must be able to swallow tablets Exclusion Criteria: - Insulin dependent diabetes - Thyroid disease	inserted ". The preferred format includes lists of inclusion and exclusion criteria as shown below."											Eligibility Criteria * Definition: Summary criteria for participant selection Example: Inclusion Criteria: • Clinical diagnosis of Alzheimer's Disease • Must be able to swallow tablets Exclusion Criteria: • Insulin dependent diabetes • Thyroid disease	inserted "*"					Eligibility Criteria Definition: Summary criteria for participant selection Example: Inclusion Criteria: • Clinical diagnosis of Alzheimer's Disease • Must be able to swallow tablets Exclusion Criteria: • Insulin dependent diabetes • Thyroid disease	deleted "Submission: Required"					Eligibility Criteria Submission: Required Definition: Summary criteria for participant selection Example: Inclusion Criteria: • Clinical diagnosis of Alzheimer's Disease • Must be able to swallow tablets Exclusion Criteria: • Insulin dependent diabetes • Thyroid disease	inserted "Submission: Required" changed Example from "Patients with amblyopia due to strabismus or anisometropia. Visual acuity in the amblyopic eye must be between 20/50 and 20/100, visual acuity in the sound eye of 20/40 or better, and there must be at least 3 lines of acuity difference between the two eyes. Patients must have had no more than two months of amblyopia therapy in the past two yea…			Eligibility Criteria Definition: Summary criteria for participant selection Example: Patients with amblyopia due to strabismus or anisometropia. Visual acuity in the amblyopic eye must be between 20/50 and 20/100, visual acuity in the sound eye of 20/40 or better, and there must be at least 3 lines of acuity difference between the two eyes. Patients must have had no more than two months of amblyo…	changed "subject" to "participant" under Example, changed "Example: Patients must be less than 7 years old with amblyopia" to "Patients with amblyopia"	Eligibility Criteria Definition: Summary criteria for subject selection Example: Patients must be less than 7 years old with amblyopia due to strabismus or anisometropia. Visual acuity in the amblyopic eye must be between 20/50 and 20/100, visual acuity in the sound eye of 20/40 or better, and there must be at least 3 lines of acuity difference between the two eyes. Patients must have had no more…		Eligibility Criteria Definition: Summary criteria for subject selection Example: Patients must be less than 7 years old with amblyopia due to strabismus or anisometropia. Visual acuity in the amblyopic eye must be between 20/50 and 20/100, visual acuity in the sound eye of 20/40 or better, and there must be at least 3 lines of acuity difference between the two eyes. Patients must have had no more…
detailed_description	CLINICAL_STUDY	Detailed Description	Detailed Description Definition: Extended description of the protocol, including more technical information (as compared to the Brief Summary) if desired. Do not include the entire protocol; do not duplicate information recorded in other data elements, such as eligibility criteria or outcome measures. (Limit: 32,000 characters) Example: Sudden out-of-hospital cardiac arrest (OOH-CA) remains a sig…	inserted "(Limit: 32,000 characters)"													Detailed Description Definition: Extended description of the protocol, including more technical information (as compared to the Brief Summary) if desired. Do not include the entire protocol; do not duplicate information recorded in other data elements, such as eligibility criteria or outcome measures. Example: Sudden out-of-hospital cardiac arrest (OOH-CA) remains a significant cause of death, in…	changed Definition from "Extended description of the protocol, including information not already contained in other fields, such as comparison(s) studied." to "Extended description of the protocol, including more technical information (as compared to the Brief Summary) if desired. Do not include the entire protocol; do not duplicate information recorded in other data elements, such as eligibility…													Detailed Description Definition: Extended description of the protocol, including information not already contained in other fields, such as comparison(s) studied. Example: Sudden out-of-hospital cardiac arrest (OOH-CA) remains a significant cause of death, in spite of recent declines in overall mortality from cardiovascular disease. Existing methods of emergency resuscitation are inadequate due t…	under definition, deleted "hypothesis and" deleted "Study Hypothesis: Public Access Defibrillation (PAD) would significantly increase survival in out-of-hospital cardiac arrest by reducing the time interval from collapse to defibrillation."	Detailed Description Definition: Extended description of the protocol, including information not already contained in other fields, such as hypothesis and comparison(s) studied. Example: Sudden out-of-hospital cardiac arrest (OOH-CA) remains a significant cause of death, in spite of recent declines in overall mortality from cardiovascular disease. Existing methods of emergency resuscitation are i…	changed "including information such as methodology and rationale not already contained in other fields" to "including information not already contained in other fields, such as hypothesis and comparison(s) studied." changed Example from "The incidence of a second stroke in patients who have had a first stroke is between 7 and 10 percent per year. Myocardial infarction (heart attack) as a complica…	Detailed Description Definition: Extended description of the protocol, including information such as methodology and rationale not already contained in other fields. Example: The incidence of a second stroke in patients who have had a first stroke is between 7 and 10 percent per year. Myocardial infarction (heart attack) as a complication of stroke adds to stroke death and disability. Because hom…	deleted "Submission: Optional"					Detailed Description Submission: Optional Definition: Extended description of the protocol, including information such as methodology and rationale not already contained in other fields. Example: The incidence of a second stroke in patients who have had a first stroke is between 7 and 10 percent per year. Myocardial infarction (heart attack) as a complication of stroke adds to stroke death and di…	inserted "Submission: Optional" changed "Technical" to "Extended" deleted "for health professionals" changed Example from "This is an open label, dose escalation study. Patients in cohorts of 3-6 receive 3 vaccinations with rV-PSA at 4-week intervals (days 1, 29, 57, and 85) in the absence of disease progression or unacceptable toxicity. Response assessment is performed at eight weeks. Patients w…					Detailed Description (if desired) Definition: Technical description of the protocol for health professionals, including information such as methodology and rationale, not already contained in other fields. Example: This is an open label, dose escalation study. Patients in cohorts of 3-6 receive 3 vaccinations with rV-PSA at 4-week intervals (days 1, 29, 57, and 85) in the absence of disease progr…	deleted "!!!"	Detailed Description (if desired) Definition: Technical description of the protocol for health professionals, including information such as methodology and rationale, not already contained in other fields. Example: This is an open label, dose escalation study. Patients in cohorts of 3-6 receive 3 vaccinations with rV-PSA at 4-week intervals (days 1, 29, 57, and 85) in the absence of disease progr…
download_date	CLINICAL_STUDY
download_date_dt	CLINICAL_STUDY
enrollment	CLINICAL_STUDY	Enrollment	Enrollment (Target or Actual Number of Subjects) FDAAA for Enrollment in Interventional Study Design, "*" for Enrollment in Observational Study Design Definition: Number of subjects in the trial.						Enrollment (Target or Actual Number of Subjects) FDAAA for Enrollment in Interventional Study Design, "*" for Enrollment in Observational Study Design Definition: Number of subjects in the trial.	inserted "FDAAA" for Enrollment in Interventional Study Design inserted "*" for Enrollment in Observational Study Design	Enrollment (Target or Actual Number of Subjects) Definition: Number of subjects in the trial.	changed "Enrollment" to "Enrollment (Target or Actual Number of Subjects)" deleted "WHO"			Enrollment WHO Definition: Number of subjects in the trial.	inserted "WHO"					Enrollment Definition: Number of subjects in the trial.	changed item name from "Target Number of Subjects" to "Enrollment" deleted "WHO" changed Definition from "Estimated number of participants to be studied" to "Number of subjects in the trial."							Target Number of Subjects WHO Definition: Estimated number of participants to be studied	inserted "WHO"			Target Number of Subjects Definition: Estimated number of participants to be studied	changed item name from Expected Total Enrollment to Target Number of Subjects	Expected Total Enrollment Definition: Estimated number of participants to be studied	deleted "Submission: Optional"					Expected Total Enrollment Submission: Optional Definition: Estimated number of participants to be studied	inserted "Submission: Optional"			Definition: Estimated number of participants to be studied	changed "subjects" to "participants"	Definition: Estimated number of subjects to be studied		Expected Total Enrollment Definition: Estimated number of subjects to be studied
enrollment_type	CLINICAL_STUDY	Enrollment Type	FDAAA for Enrollment in Interventional Study Design, "*" for Enrollment in Observational Study Design A "Type" menu is also included, with options Anticipated and Actual. For active studies, set Type to Anticipated and specify the expected enrollment, updating the number as needed over the course of the study. Upon study completion, change Type to Actual and update the enrollment if necessary. FD…						FDAAA for Enrollment in Interventional Study Design, "*" for Enrollment in Observational Study Design A "Type" menu is also included, with options Anticipated and Actual. For active studies, set Type to Anticipated and specify the expected enrollment, updating the number as needed over the course of the study. Upon study completion, change Type to Actual and update the enrollment if necessary.	inserted "FDAAA" for Enrollment in Interventional Study Design inserted "*" for Enrollment in Observational Study Design	A "Type" menu is also included, with options Anticipated and Actual. For active studies, set Type to Anticipated and specify the expected enrollment, updating the number as needed over the course of the study. Upon study completion, change Type to Actual and update the enrollment if necessary.	deleted "WHO"			WHO A "Type" menu is also included, with options Anticipated and Actual. For active studies, set Type to Anticipated and specify the expected enrollment, updating the number as needed over the course of the study. Upon study completion, change Type to Actual and update the enrollment if necessary.	inserted "WHO"					A "Type" menu is also included, with options Anticipated and Actual. For active studies, set Type to Anticipated and specify the expected enrollment, updating the number as needed over the course of the study. Upon study completion, change Type to Actual and update the enrollment if necessary.	inserted new item: "Enrollment A "Type" menu is also included, with options Anticipated and Actual. For active studies, set Type to Anticipated and specify the expected enrollment, updating the number as needed over the course of the study. Upon study completion, change Type to Actual and update the enrollment if necessary."
firstreceived_date	CLINICAL_STUDY	First Received Date	Definition not found
firstreceived_results_date	CLINICAL_STUDY	First Received Results Date	Definition not found
gender	CLINICAL_STUDY	Gender	Gender * FDAAA Definition: Physical gender of individuals who may participate in the protocol. Select one. • Both: both female and male participants are being studied • Female: only female participants are being studied • Male: only male participants are being studied						Gender * FDAAA Definition: Physical gender of individuals who may participate in the protocol. Select one. • Both: both female and male participants are being studied • Female: only female participants are being studied • Male: only male participants are being studied	inserted "* FDAAA"	Gender Definition: Physical gender of individuals who may participate in the protocol. Select one. • Both: both female and male participants are being studied • Female: only female participants are being studied • Male: only male participants are being studied	deleted "*"																	Gender * Definition: Physical gender of individuals who may participate in the protocol. Select one. • Both: both female and male participants are being studied • Female: only female participants are being studied • Male: only male participants are being studied	inserted "*"					Gender Definition: Physical gender of individuals who may participate in the protocol. Select one. • Both: both female and male participants are being studied • Female: only female participants are being studied • Male: only male participants are being studied	deleted "Submission: Required"					Gender Submission: Required Definition: Physical gender of individuals who may participate in the protocol. Select one. • Both: both female and male participants are being studied • Female: only female participants are being studied • Male: only male participants are being studied	inserted "Submission: Required"			Gender Definition: Physical gender of individuals who may participate in the protocol. Select one. o Both: both female and male participants are being studied o Female: only female participants are being studied o Male: only male participants are being studied	changed "subjects" to "participants" - three times	Gender Definition: Physical gender of individuals who may participate in the protocol. Select one. o Both: both female and male subjects are being studied o Female: only female subjects are being studied o Male: only male subjects are being studied		Gender Definition: Physical gender of individuals who may participate in the protocol. Select one. * Both: both female and male subjects are being studied * Female: only female subjects are being studied * Male: only male subjects are being studied
has_dmc	CLINICAL_STUDY	Data Monitoring Committee?	Data Monitoring Committee? Definition: Indicate whether a data monitoring committee has been appointed for this study. The data monitoring committee (board) is a group of independent scientists who are appointed to monitor the safety and scientific integrity of a human research intervention, and to make recommendations to the sponsor regarding the stopping of the trial for efficacy, for harms or …																		Data Monitoring Committee? Definition: Indicate whether a data monitoring committee has been appointed for this study. The data monitoring committee (board) is a group of independent scientists who are appointed to monitor the safety and scientific integrity of a human research intervention, and to make recommendations to the sponsor regarding the stopping of the trial for efficacy, for harms or …	inserted new item "Data Monitoring Committee? Definition: Indicate whether a data monitoring committee has been appointed for this study. The data monitoring committee (board) is a group of independent scientists who are appointed to monitor the safety and scientific integrity of a human research intervention, and to make recommendations to the sponsor regarding the stopping of the trial for effi…
has_expanded_access	CLINICAL_STUDY	Has Expanded Access?	Has Expanded Access? FDAAA Definition: Indicate whether any non-protocol access is to be provided for the investigational drug or device. If so, an Expanded Access record should also be created for this IND/IDE. Expanded Access Record FDAAA Definition: The ClinicalTrials.gov identifier (NCT number) for the Expanded Access record associated with this study, specified if and only if "Yes" is specif…	inserted "Expanded Access Record FDAAA Definition: The ClinicalTrials.gov identifier (NCT number) for the Expanded Access record associated with this study, specified if and only if "Yes" is specified for Has Expanded Access."					Has Expanded Access? FDAAA Definition: Indicate whether any non-protocol access is to be provided for the investigational drug or device. If so, an Expanded Access record should also be created for this IND/IDE.	inserted "FDAAA"													Has Expanded Access? Definition: Indicate whether any non-protocol access is to be provided for the investigational drug or device. If so, an Expanded Access record should also be created for this IND/IDE.	inserted new item "Has Expanded Access? Definition: Indicate whether any non-protocol access is to be provided for the investigational drug or device. If so, an Expanded Access record should also be created for this IND/IDE."
healthy_volunteers	CLINICAL_STUDY	Accepts Healthy Volunteers?	Accepts Healthy Volunteers? FDAAA Definition: Indicate if persons who have not had the condition(s) being studied or otherwise related conditions or symptoms, as specified in the eligibility requirements, may participate in the study. Select Yes/No.						Accepts Healthy Volunteers? FDAAA Definition: Indicate if persons who have not had the condition(s) being studied or otherwise related conditions or symptoms, as specified in the eligibility requirements, may participate in the study. Select Yes/No.	inserted "FDAAA"											Accepts Healthy Volunteers? Definition: Indicate if persons who have not had the condition(s) being studied or otherwise related conditions or symptoms, as specified in the eligibility requirements, may participate in the study. Select Yes/No.	deleted "Acceptable Participants"													Acceptable Participants Accepts Healthy Volunteers? Definition: Indicate if persons who have not had the condition(s) being studied or otherwise related conditions or symptoms, as specified in the eligibility requirements, may participate in the study. Select Yes/No.	deleted "Submission: Required"					Acceptable Participants Accepts Healthy Volunteers? Submission: Required Definition: Indicate if persons who have not had the condition(s) being studied or otherwise related conditions or symptoms, as specified in the eligibility requirements, may participate in the study. Select Yes/No.	inserted "Submission: Required"			Acceptable Participants Accepts Healthy Volunteers? Definition: Indicate if persons who have not had the condition(s) being studied or otherwise related conditions or symptoms, as specified in the eligibility requirements, may participate in the study. Select Yes/No.	inserted "Acceptable Participants" as a section header, covering both the Accepts Healthy Volunteers item and the Accepts Patients item	Accepts Healthy Volunteers? Definition: Indicate if persons who have not had the condition(s) being studied or otherwise related conditions or symptoms, as specified in the eligibility requirements, may particiate in the study. Select one (Yes/No).	changed "healthy volunteers are sought for the protocol" to "persons who have not had the condition(s) being studied or otherwise related conditions or symptoms, as specified in the eligibility requirements, may particiate in the study"	Accepts Healthy Volunteers? Definition: Indicate if healthy volunteers are sought for the protocol. Select one (Yes/No).
is_fda_regulated	CLINICAL_STUDY	FDA Regulated Intervention?	FDA Regulated Intervention? (FDAAA) Definition: Indicate whether this trial includes an intervention subject to US Food and Drug Administration regulation under section 351 of the Public Health Service Act or any of the following sections of the Federal Food, Drug and Cosmetic Act: 505, 510(k), 515, 520(m), and 522. Select Yes/No.						FDA Regulated Intervention? (FDAAA) Definition: Indicate whether this trial includes an intervention subject to US Food and Drug Administration regulation under section 351 of the Public Health Service Act or any of the following sections of the Federal Food, Drug and Cosmetic Act: 505, 510(k), 515, 520(m), and 522. Select Yes/No.	inserted "(FDAAA)"	FDA Regulated Intervention? Definition: Indicate whether this trial includes an intervention subject to US Food and Drug Administration regulation under section 351 of the Public Health Service Act or any of the following sections of the Federal Food, Drug and Cosmetic Act: 505, 510(k), 515, 520(m), and 522. Select Yes/No.	inserted new item "FDA Regulated Intervention? Definition: Indicate whether this trial includes an intervention subject to US Food and Drug Administration regulation under section 351 of the Public Health Service Act or any of the following sections of the Federal Food, Drug and Cosmetic Act: 505, 510(k), 515, 520(m), and 522. Select Yes/No."
is_section_801	CLINICAL_STUDY	Section 801 Clinical Trial?	Section 801 Clinical Trial? (FDAAA) Definition: If this trial includes an FDA regulated intervention, indicate whether this is an "applicable clinical trial" as defined in US Public Law 110-85, Title VIII, Section 801. Briefly, applicable drug trials include controlled clinical investigations, other than Phase I investigations, of a drug or biologic subject to US FDA regulation. Applicable device…						Section 801 Clinical Trial? (FDAAA) Definition: If this trial includes an FDA regulated intervention, indicate whether this is an "applicable clinical trial" as defined in US Public Law 110-85, Title VIII, Section 801. Briefly, applicable drug trials include controlled clinical investigations, other than Phase I investigations, of a drug or biologic subject to US FDA regulation. Applicable device…	inserted "(FDAAA)"	Section 801 Clinical Trial? Definition: If this trial includes an FDA regulated intervention, indicate whether this is an "applicable clinical trial" as defined in US Public Law 110-85, Title VIII, Section 801. Briefly, applicable drug trials include controlled clinical investigations, other than Phase I investigations, of a drug or biologic subject to US FDA regulation. Applicable device clinica…	inserted new item "Section 801 Clinical Trial? Definition: If this trial includes an FDA regulated intervention, indicate whether this is an "applicable clinical trial" as defined in US Public Law 110-85, Title VIII, Section 801. Briefly, applicable drug trials include controlled clinical investigations, other than Phase I investigations, of a drug or biologic subject to US FDA regulation. Applic…
lastchanged_date	CLINICAL_STUDY	Last Changed Date	Definition not found
maximum_age	CLINICAL_STUDY	Maximum Age	Age Limits * FDAAA Maximum Age Definition: Maximum age of participants. Provide a number and a unit of time (years, months, weeks, days, hours or minutes). Select "N/A (No limit)" if no maximum age is indicated.						Age Limits * FDAAA Maximum Age Definition: Maximum age of participants. Provide a number and a unit of time (years, months, weeks, days, hours or minutes). Select "N/A (No limit)" if no maximum age is indicated.	inserted "* FDAAA"	Age Limits Maximum Age Definition: Maximum age of participants. Provide a number and a unit of time (years, months, weeks, days, hours or minutes). Select "N/A (No limit)" if no maximum age is indicated.	deleted "*"																	Age Limits Maximum Age * Definition: Maximum age of participants. Provide a number and a unit of time (years, months, weeks, days, hours, or minutes). Select "N/A (No limit)" if no maximum age is indicated.	inserted "*"					Age Limits Maximum Age Definition: Maximum age of participants. Provide a number and a unit of time (years, months, weeks, days, hours, or minutes). Select "N/A (No limit)" if no maximum age is indicated.	deleted "Submission: Required"					Age Limits Maximum Age Submission: Required Definition: Maximum age of participants. Provide a number and a unit of time (years, months, weeks, days, hours, or minutes). Select "N/A (No limit)" if no maximum age is indicated.	inserted "Submission: Required"			Age Limits Maximum Age Definition: Maximum age of participants. Provide a number and a unit of time (years, months, weeks, days, hours, or miniutes).minutes). Select "N/A (No limit)" if no maximum age is indicated.	changed "subjects" to "participants"	Age Limits Maximum Age Definition: Maximum age of subjects. Provide a number and a unit of time (years, months, weeks, days, hours, or miniutes). Select "N/A (No limit)" if no maximum age is indicated.		Maximum Age Definition: Maximum age of subjects. Provide a number and a unit of time (years, months, weeks, days, hours, or miniutes). Select "N/A (No limit)" if no maximum age is indicated.
minimum_age	CLINICAL_STUDY	Minimum Age	Age Limits * FDAAA Minimum Age Definition: Minimum age of participants. Provide a number and select a unit of time (years, months, weeks, days, hours or minutes). Select "N/A (No limit)" if no minimum age is indicated.						Age Limits * FDAAA Minimum Age Definition: Minimum age of participants. Provide a number and select a unit of time (years, months, weeks, days, hours or minutes). Select "N/A (No limit)" if no minimum age is indicated.	inserted "* FDAAA"	Age Limits Minimum Age Definition: Minimum age of participants. Provide a number and select a unit of time (years, months, weeks, days, hours or minutes). Select "N/A (No limit)" if no minimum age is indicated.	deleted "*"																	Age Limits Minimum Age * Definition: Minimum age of participants. Provide a number and select a unit of time (years, months, weeks, days, hours, or minutes). Select "N/A (No limit)" if no minimum age is indicated.	inserted "*"					Age Limits Minimum Age Definition: Minimum age of participants. Provide a number and select a unit of time (years, months, weeks, days, hours, or minutes). Select "N/A (No limit)" if no minimum age is indicated.	deleted "Submission: Required"					Age Limits Minimum Age Submission: Required Definition: Minimum age of participants. Provide a number and select a unit of time (years, months, weeks, days, hours, or minutes). Select "N/A (No limit)" if no minimum age is indicated.	inserted "Submission: Required"			Age Limits Minimum Age Definition: Minimum age of participants. Provide a number and select a unit of time (years, months, weeks, days, hours, or minutes). Select "N/A (No limit)" if no minimum age is indicated.	changed "subjects" to "participants"	Age Limits Minimum Age Definition: Minimum age of subjects. Provide a number and select a unit of time (years, months, weeks, days, hours, or miniutes). Select "N/A (No limit)" if no minimum age is indicated.		Minimum Age Definition: Minimum age of subjects. Provide a number and select a unit of time (years, months, weeks, days, hours, or miniutes). Select "N/A (No limit)" if no minimum age is indicated.
nct_alias	CLINICAL_STUDY		Definition not found
nct_id	CLINICAL_STUDY	ClinicalTrials.gov registry number	Definition not found
number_of_arms	CLINICAL_STUDY	Number of Arms	Number of Arms (FDAAA) Definition: Number of intervention groups (enter 1 for single-arm study).						Number of Arms (FDAAA) Definition: Number of intervention groups (enter 1 for single-arm study).	inserted "(FDAAA)"											Number of Arms Definition: Number of intervention groups (enter 1 for single-arm study).	inserted new item: "Number of Arms Definition: Number of intervention groups (enter 1 for single-arm study)."
number_of_groups	CLINICAL_STUDY	Number of Groups	Number of Groups/Cohorts * Definition: Number of study groups/cohorts. Enter 1 for a single-group study. Many observational studies have one group/cohort; case control studies typically have two.						Number of Groups/Cohorts * Definition: Number of study groups/cohorts. Enter 1 for a single-group study. Many observational studies have one group/cohort; case control studies typically have two.	inserted "*"
official_title	CLINICAL_STUDY	Official Title	Official Title Definition: Official name of the protocol provided by the study principal investigator or sponsor. Example: Phase 1 Study of Recombinant Vaccinia Virus That Expresses Prostate Specific Antigen in Metastatic Adenocarcinoma of the Prostate (Limit: 600 characters)	inserted "(Limit: 600 characters)"							Official Title Definition: Official name of the protocol provided by the study principal investigator or sponsor. Example: Phase 1 Study of Recombinant Vaccinia Virus That Expresses Prostate Specific Antigen in Metastatic Adenocarcinoma of the Prostate	deleted "WHO"																	Official Title WHO Definition: Official name of the protocol provided by the study principal investigator or sponsor. Example: Phase 1 Study of Recombinant Vaccinia Virus That Expresses Prostate Specific Antigen in Metastatic Adenocarcinoma of the Prostate	inserted "WHO"	Official Title Definition: Official name of the protocol provided by the study principal investigator or sponsor. Example: Phase 1 Study of Recombinant Vaccinia Virus That Expresses Prostate Specific Antigen in Metastatic Adenocarcinoma of the Prostate	changed "the principal investigator or sponsor" to "the study principal investigator or sponsor"			Official Title Definition: Official name of the protocol provided by the principal investigator or sponsor. Example: Phase 1 Study of Recombinant Vaccinia Virus That Expresses Prostate Specific Antigen in Metastatic Adenocarcinoma of the Prostate	deleted "Submission: Optional"					Official Title Submission: Optional Definition: Official name of the protocol provided by the principal investigator or sponsor. Example: Phase 1 Study of Recombinant Vaccinia Virus That Expresses Prostate Specific Antigen in Metastatic Adenocarcinoma of the Prostate	inserted "Submission: Optional"	Official Title (if desired) Definition: Official name of the protocol provided by the principal investigator or sponsor. Example: Phase 1 Study of Recombinant Vaccinia Virus That Expresses Prostate Specific Antigen in Metastatic Adenocarcinoma of the Prostate
org_study_id	CLINICAL_STUDY	Organization's Unique Protocol id	Organization's Unique Protocol ID * FDAAA Definition: Unique identification assigned to the protocol by the sponsoring organization, usually an accession number or a variation of a grant number. Multiple studies conducted under the same grant must each have a unique number. Examples: ABT-1233-RV Merck-023 ACTG 021	inserted "(Limit: 30 characters)"					Organization's Unique Protocol ID * FDAAA Definition: Unique identification assigned to the protocol by the sponsoring organization, usually an accession number or a variation of a grant number. Multiple studies conducted under the same grant must each have a unique number. Examples: ABT-1233-RV Merck-023 ACTG 021	inserted "* FDAAA"	Organization's Unique Protocol ID Definition: Unique identification assigned to the protocol by the sponsoring organization, usually an accession number or a variation of a grant number. Multiple studies conducted under the same grant must each have a unique number. Examples: ABT-1233-RV Merck-023 ACTG 021	deleted "*" deleted "Examples: CC-99-H-0020, R01-123456-1, R01-123456-2" inserted "ABT-1233-RV Merck-023 ACTG 021"																	Organization's Unique Protocol ID * Definition: Unique identification assigned to the protocol by the sponsoring organization, usually an accession number or a variation of a grant number. Multiple studies conducted under the same grant must each have a unique number. Examples: CC-99-H-0020; R01-123456-1; R01-123456-2	inserted "*"					1. Titles and Background Information Organization's Unique Protocol ID Definition: Unique identification assigned to the protocol by the sponsoring organization, usually an accession number or a variation of a grant number. Multiple studies conducted under the same grant must each have a unique number. Examples: CC-99-H-0020; R01-123456-1; R01-123456-2	deleted "Submission: Required"					Organization's Unique Protocol ID Submission: Required Definition: Unique identification assigned to the protocol by the sponsoring organization, usually an accession number or a variation of a grant number. Multiple studies conducted under the same grant must each have a unique number. Examples: CC-99-H-0020; R01-123456-1; R01-123456-2	inserted "Submission: Required"			Organization's Unique Protocol ID Definition: Unique identification assigned to the protocol by the sponsoring organization, usually an accession number or a variation of a grant number. Multiple studies conducted under the same grant must each have a unique number. Examples: CC-99-H-0020; R01-123456-1; R01-123456-2	changed "same grant" to "same grant number" inserted "; R01-123456-1; R01-123456-2"	Organization's Unique Protocol ID Definition: Unique identification assigned to the protocol by the sponsoring organization, usually an accession number or a variation of a grant number. Multiple studies conducted under the same grant number must each have a unique number. Example: CC-99-H-0020
overall_status	CLINICAL_STUDY	Overall Recruitment Status	Overall Recruitment Status * FDAAA [Required when Study Type is "Interventional" or "Observational".] Definition: Overall accrual activity for the protocol. Select one. Not yet recruiting: participants are not yet being recruited Recruiting: participants are currently being recruited Enrolling by invitation: participants are being (or will be) selected from a predetermined population Active, not …	under Overall Recruitment Status, inserted "[Required when Study Type is "Interventional" or "Observational".]" under Expanded Access Status, deleted "FDAAA" under Expanded Access Status, inserted "*"					Overall Recruitment Status * FDAAA Definition: Overall accrual activity for the protocol. Select one. • Not yet recruiting: participants are not yet being recruited • Recruiting: participants are currently being recruited • Enrolling by invitation: participants are being (or will be) selected from a predetermined population • Active, not recruiting: study is ongoing (i.e., patients are being trea…	under Overall Recruitment Status, inserted "* FDAAA" under Expanded Access Status, inserted "FDAAA"	Overall Recruitment Status Definition: Overall accrual activity for the protocol. Select one. Not yet recruiting: participants are not yet being recruited Recruiting: participants are currently being recruited Enrolling by invitation: participants are being (or will be) selected from a predetermined population Active, not recruiting: study is ongoing (i.e., patients are being treated or examined)…	under Overall Recruitment Status, deleted "*" under Expanded Access Status, deleted "*"	Overall Recruitment Status * Definition: Overall accrual activity for the protocol. Select one. Not yet recruiting: participants are not yet being recruited Recruiting: participants are currently being recruited Enrolling by invitation: participants are being (or will be) selected from a predetermined population Active, not recruiting: study is ongoing (i.e., patients are being treated or examine…	under Not Yet Recruiting, changed "participants are not yet being recruited or enrolled" to "participants are not yet being recruited" under Recruiting, changed "participants are currently being recruited and enrolled" to "participants are currently being recruited" deleted "• No longer recruiting: participants are no longer being recruited or enrolled" inserted "• Enrolling by invitation: partic…					Overall Recruitment Status * Definition: Overall accrual activity for the protocol. Select one. Not yet recruiting: participants are not yet being recruited or enrolled Recruiting: participants are currently being recruited and enrolled No longer recruiting: participants are no longer being recruited or enrolled Completed: the study has concluded normally; participants are no longer being examine…	under Completed, changed "participants are no longer being examined or treated (i.e., last patient's last visit has occurred)" to ": the study has concluded normally; participants are no longer being examined or treated (i.e., last patient's last visit has occurred)" under Suspended, changed "halted" to "halted prematurely" under Terminated, changed "halted" to "halted prematurely" under Withdraw…	Overall Recruitment Status * Definition: Overall accrual activity for the protocol. Select one. Not yet recruiting: participants are not yet being recruited or enrolled Recruiting: participants are currently being recruited and enrolled No longer recruiting: participants are no longer being recruited or enrolled Completed: participants are no longer being examined or treated (i.e., last patient's…	changed "Overall protocol accrual" to "overall accrual" under Completed, changed ""no longer being recruited; data analysis is complete" to "no longer being examined or treated (i.e., last patient's last visit has occurred)" under Terminated, inserted "; participants are no longer being examined or treated"	Overall Recruitment Status * Definition: Overall protocol accrual activity for the protocol. Select one. Not yet recruiting: participants are not yet being recruited or enrolled Recruiting: participants are currently being recruited and enrolled No longer recruiting: participants are no longer being recruited or enrolled Completed: participants are no longer being recruited; data analysis is comp…	inserted "Expanded Access Status * Definition: Status indicating availability of an experimental drug or device outside any clinical trial protocol. This data element is only applicable for Expanded Access records (see Expanded Access under Study Type). Select one. Available: expanded access is currently available for this treatment. No longer available: expanded access was available for this tre…			Overall Recruitment Status * Definition: Overall protocol accrual activity for the protocol. Select one. • Not yet recruiting: participants are not yet being recruited or enrolled • Recruiting: participants are currently being recruited and enrolled • No longer recruiting: participants are no longer being recruited or enrolled • Completed: participants are no longer being recruited; data analysis…	inserted "Withdrawn: study terminated prior to enrollment of first participant"	Overall Recruitment Status * Definition: Overall protocol accrual activity for the protocol. Select one. • Not yet recruiting: participants are not yet being recruited or enrolled • Recruiting: participants are currently being recruited and enrolled • No longer recruiting: participants are no longer being recruited or enrolled • Completed: participants are no longer being recruited; data analysis…	inserted "*"					Overall Recruitment Status Definition: Overall protocol accrual activity for the protocol. Select one. • Not yet recruiting: participants are not yet being recruited or enrolled • Recruiting: participants are currently being recruited and enrolled • No longer recruiting: participants are no longer being recruited or enrolled • Completed: participants are no longer being recruited; data analysis i…	deleted "Submission: Required"	Overall Recruitment Status Submission: Required Definition: Overall protocol accrual activity for the protocol. Select one. • Not yet recruiting: participants are not yet being recruited or enrolled • Recruiting: participants are currently being recruited and enrolled • No longer recruiting: participants are no longer being recruited or enrolled • Completed: participants are no longer being recru…	changed "Overall Study Status" to "Overall Recruitment Status"			Overall Study Status Submission: Required Definition: Overall protocol accrual activity for the protocol. Select one. • Not yet recruiting: participants are not yet being recruited or enrolled • Recruiting: participants are currently being recruited and enrolled • No longer recruiting: participants are no longer being recruited or enrolled • Completed: participants are no longer being recruited; …	inserted "Submission: Required" changed "protocol is not yet recruiting and enrolling participants" to "participants are not yet being recruited or enrolled" changed "protocol is actively recruiting and enrolling participants" to "participants are currently being recruited and enrolled" changed "protocol is not recruiting or enrolling participants" to "participants are no longer being recruited o…			Overall Study Status Definition: Overall protocol accrual activity for the protocol. Select one. Not yet recruiting: the protocol is not yet recruiting and enrolling participants Recruiting: the protocol is actively recruiting and enrolling participants No longer recruiting: the protocol is not recruiting or enrolling participants Completed: the protocol is no longer recruiting. Data analysis is …	changed "subjects" to "participants" - multiple times	Overall Study Status Definition: Overall protocol accrual activity for the protocol. Select one. Not yet recruiting: the protocol is not yet recruiting and enrolling subjects Recruiting: the protocol is actively recruiting and enrolling subjects No longer recruiting: the protocol is not recruiting or enrolling subjects Completed: the protocol is no longer recruiting. Data analysis is complete. Su…
phase	CLINICAL_STUDY	Study Phase	Study Phase * FDAAA Definition: Phase of investigation, as defined by the US FDA for trials involving investigational new drugs. Select only one. N/A: for trials without phases Phase 0: exploratory trials, involving very limited human exposure, with no therapeutic or diagnostic intent (e.g., screening studies, microdose studies). See FDA guidance on exploratory IND studies for more information. P…						Study Phase * FDAAA Definition: Phase of investigation, as defined by the US FDA for trials involving investigational new drugs. Select only one. N/A: for trials without phases Phase 0: exploratory trials, involving very limited human exposure, with no therapeutic or diagnostic intent (e.g., screening studies, microdose studies). See FDA guidance on exploratory IND studies for more information. P…	inserted "* FDAAA"	Study Phase Definition: Phase of investigation, as defined by the US FDA for trials involving investigational new drugs. Select only one. N/A: for trials without phases Phase 0: exploratory trials, involving very limited human exposure, with no therapeutic or diagnostic intent (e.g., screening studies, microdose studies). See FDA guidance on exploratory IND studies for more information. Phase 1: …	deleted "*" under Phase 4, changed "post-marketing studies" to "studies of FDA-approved drugs"									Study Phase * Definition: Phase of investigation, as defined by the US FDA for trials involving investigational new drugs. Select only one. N/A: for trials without phases Phase 0: exploratory trials, involving very limited human exposure, with no therapeutic or diagnostic intent (e.g., screening studies, microdose studies). See FDA guidance on exploratory IND studies for more information. Phase 1…	under N/A, deleted "such as observational trials or expanded access trials"					Study Phase * Definition: Phase of investigation, as defined by the US FDA for trials involving investigational new drugs. Select only one. N/A: for trials without phases, such as observational trials or expanded access trials. Phase 0: exploratory trials, involving very limited human exposure, with no therapeutic or diagnostic intent (e.g., screening studies, microdose studies). See FDA guidance…	changed "Phase of investigation. Select only one." to "Phase of investigation, as defined by the US FDA for trials involving investigational new drugs. Select only one. N/A: for trials without phases, such as observational trials or expanded access trials. Phase 0: exploratory trials, involving very limited human exposure, with no therapeutic or diagnostic intent (e.g., screening studies, microdo…	Study Phase * Definition: Phase of investigation. Select only one. Phase 1: includes initial studies to determine the metabolism and pharmacologic actions of drugs in humans, the side effects associated with increasing doses, and to gain early evidence of effectiveness; may include healthy participants and/or patients Phase 1/Phase 2: for trials that are a combination of phases 1 and 2 Phase 2: i…	inserted "*"					Study Phase Definition: Phase of investigation. Select only one. Phase 1: includes initial studies to determine the metabolism and pharmacologic actions of drugs in humans, the side effects associated with increasing doses, and to gain early evidence of effectiveness; may include healthy participants and/or patients Phase 1/Phase 2: for trials that are a combination of phases 1 and 2 Phase 2: inc…	deleted "Submission: Required"					Study Phase Submission: Required Definition: Phase of investigation. Select only one. Phase 1: includes initial studies to determine the metabolism and pharmacologic actions of drugs in humans, the side effects associated with increasing doses, and to gain early evidence of effectiveness; may include health participants and/or patients Phase 1/Phase 2: for trials that are a combination of phases …	under Study Phase, inserted "Submission: Required" under Phase1/Phase2, inserted ": for trials that are a combination of phases 1 and 2" under Phase2/Phase3, inserted ": for trials that are a combination of phases 2 and 3" changed "N/A: IND studies must not use this option" to "N/A: or trials without phases, such as expanded access trials or registries. Used rarely."			Study Phase Definition: Phase of investigation. Select only one. Phase 1: includes initial studies to determine the metabolism and pharmacologic actions of drugs in humans, the side effects associated with increasing doses, and to gain early evidence of effectiveness; may include health participants and/or patients Phase 1/Phase 2 Phase 2: includes controlled clinical studies conducted to evaluat…	under Phase 1, inserted "; may include health participants and/or patients" under Phase 2, changed "evaluation" to "evaluate"	Study Phase Definition: Phase of investigation. Select only one. Phase 1: includes initial studies to determine the metabolism and pharmacologic actions of drugs in humans, the side effects associated with increasing doses, and to gain early evidence of effectiveness Phase 1/Phase 2 Phase 2: includes controlled clinical studies conducted to evaluation the effectiveness of the drug for a particula…
primary_completion_date	CLINICAL_STUDY	Primary Completion Date	Primary Completion Date FDAAA Definition: As specified in US Public Law 110-85, Title VIII, Section 801, with respect to an applicable clinical trial, the date that the final subject was examined or received an intervention for the purposes of final collection of data for the primary outcome, whether the clinical trial concluded according to the prespecified protocol or was terminated.						Primary Completion Date FDAAA Definition: As specified in US Public Law 110-85, Title VIII, Section 801, with respect to an applicable clinical trial, the date that the final subject was examined or received an intervention for the purposes of final collection of data for the primary outcome, whether the clinical trial concluded according to the prespecified protocol or was terminated.	inserted "FDAAA"	Primary Completion Date Definition: As specified in US Public Law 110-85, Title VIII, Section 801, with respect to an applicable clinical trial, the date that the final subject was examined or received an intervention for the purposes of final collection of data for the primary outcome, whether the clinical trial concluded according to the prespecified protocol or was terminated.	inserted new item "Primary Completion Date Definition: As specified in US Public Law 110-85, Title VIII, Section 801, with respect to an applicable clinical trial, the date that the final subject was examined or received an intervention for the purposes of final collection of data for the primary outcome, whether the clinical trial concluded according to the prespecified protocol or was terminate…
primary_completion_date_type	CLINICAL_STUDY	Primary Completion Date Type	FDAAA A "Type" menu is also included, with options Anticipated and Actual. For active studies, set Type to Anticipated and specify the expected completion date, updating the date as needed over the course of the study. Upon study completion, change Type to Actual and update the date if necessary.						FDAAA A "Type" menu is also included, with options Anticipated and Actual. For active studies, set Type to Anticipated and specify the expected completion date, updating the date as needed over the course of the study. Upon study completion, change Type to Actual and update the date if necessary.	inserted "FDAAA" changed "Use the Type menu (Anticipated/Actual) as described above." to "A "Type" menu is also included, with options Anticipated and Actual. For active studies, set Type to Anticipated and specify the expected completion date, updating the date as needed over the course of the study. Upon study completion, change Type to Actual and update the date if necessary."	Use the Type menu (Anticipated/Actual) as described above. [A "Type" menu is also included, with options Anticipated and Actual. For active studies, set Type to Anticipated and specify the expected completion date, updating the date as needed over the course of the study. Upon study completion, change Type to Actual and update the date if necessary.]	inserted new item "Use the Type menu (Anticipated/Actual) as described above. [A "Type" menu is also included, with options Anticipated and Actual. For active studies, set Type to Anticipated and specify the expected completion date, updating the date as needed over the course of the study. Upon study completion, change Type to Actual and update the date if necessary.]"
sampling_method	CLINICAL_STUDY	Sampling Method	Sampling Method * - For observational studies only, select one and explain in Detailed Description. • Probability Sample: exclusively random process to guarantee that each participant or population has specified chance of selection, such as simple random sampling, systematic sampling, stratified random sampling, cluster sampling, and consecutive patient sampling • Non-Probability Sample: any of a…						Sampling Method * - For observational studies only, select one and explain in Detailed Description. • Probability Sample: exclusively random process to guarantee that each participant or population has specified chance of selection, such as simple random sampling, systematic sampling, stratified random sampling, cluster sampling, and consecutive patient sampling • Non-Probability Sample: any of a…	inserted "*"			Sampling Method - For observational studies only, select one and explain in Detailed Description. • Probability Sample: exclusively random process to guarantee that each participant or population has specified chance of selection, such as simple random sampling, systematic sampling, stratified random sampling, cluster sampling, and consecutive patient sampling • Non-Probability Sample: any of a v…	inserted new item "Sampling Method - For observational studies only, select one and explain in Detailed Description. • Probability Sample: exclusively random process to guarantee that each participant or population has specified chance of selection, such as simple random sampling, systematic sampling, stratified random sampling, cluster sampling, and consecutive patient sampling • Non-Probability…
source	CLINICAL_STUDY		Definition not found
start_date	CLINICAL_STUDY	Study Start Date	Study Start Date FDAAA Definition: Date that enrollment to the protocol begins.						Study Start Date FDAAA Definition: Date that enrollment to the protocol begins.	inserted "FDAAA"	Study Start Date Definition: Date that enrollment to the protocol begins.	deleted "WHO"																	Study Start Date WHO Definition: Date that enrollment to the protocol begins.	inserted "WHO"					Study Start Date Definition: Date that enrollment to the protocol begins.	changed "Start Date" to "Study Start Date" deleted "Submission: Optional"					Start Date Submission: Optional Definition: Date that enrollment to the protocol begins.	inserted "Submission: Optional" inserted "enrollment to"	Start Date Definition: Date that the protocol begins.
study_design	CLINICAL_STUDY	Study Design	Interventional Study Design * (FDAAA) Definition: Primary investigative techniques used in the protocol. Select the most appropriate term describing the protocol from each of the following data elements. Observational Study Design						Interventional Study Design * (FDAAA) Definition: Primary investigative techniques used in the protocol. Select the most appropriate term describing the protocol from each of the following data elements. Observational Study Design	under Interventional Study Design, inserted "* (FDAAA)"	Interventional Study Design Definition: Primary investigative techniques used in the protocol. Select the most appropriate term describing the protocol from each of the following data elements. Observational Study Design	changed "Interventional Study Characteristics" to "Interventional Study Design" changed "the following categories" to "the following data elements" changed "Observational Study Characteristics" to "Observational Study Design"							Interventional Study Characteristics Definition: Primary investigative techniques used in the protocol. Select the most appropriate term describing the protocol from each of the following categories. Observational Study Characteristics	under Interventional Study Characteristics, changed "each of the six categories: Purpose, Allocation, Masking, Control, Assignment, and Endpoint" to "each of the following categories"	Interventional Study Characteristics Definition: Primary investigative techniques used in the protocol. Select the most appropriate term describing the protocol from each of the six categories: Purpose, Allocation, Masking, Control, Assignment, and Endpoint. Observational Study Characteristics	changed "Study Type (Interventional)" to Interventional Study Characteristics changed "Study Type (Observational)" to Observational Study Characteristics													Study Type (Interventional) Definition: Primary investigative techniques used in the protocol. Select the most appropriate term describing the protocol from each of the six categories: Purpose, Allocation, Masking, Control, Assignment, and Endpoint. Study Type (Observational)	under Study Type (Interventional), deleted "Submission Required" under Study Type (Observational), deleted "Submission Required"					Study Type (Interventional) Submission: Required Definition: Primary investigative techniques used in the protocol. Select the most appropriate term describing the protocol from each of the six categories: Purpose, Allocation, Masking, Control, Assignment, and Endpoint. Study Type (Observational) Submission: Required	under Study Type (Interventional), inserted "Submission Required" under Study Type (Observational), inserted "Submission Required"	Study Type (Interventional) Definition: Primary investigative techniques used in the protocol. Select the most appropriate term describing the protocol from each of the six categories: Purpose, Allocation, Masking, Control, Assignment, and Endpoint. Study Type (Observational)
study_pop	CLINICAL_STUDY	Study Population Description	Definition: For observational studies only, a description of the population from which the groups or cohorts will be selected (e.g., primary care clinic, community sample, residents of a certain town). (Limit: 1000 characters)	inserted "(Limit: 1000 characters)"					Study Population Description * Definition: For observational studies only, a description of the population from which the groups or cohorts will be selected (e.g., primary care clinic, community sample, residents of a certain town).	inserted "*"			Study Population Description Definition: For observational studies only, a description of the population from which the groups or cohorts will be selected (e.g., primary care clinic, community sample, residents of a certain town)."	inserted new item "Study Population Description Definition: For observational studies only, a description of the population from which the groups or cohorts will be selected (e.g., primary care clinic, community sample, residents of a certain town)."
study_type	CLINICAL_STUDY	Study Type	Study Type * FDAAA Definition: Nature of the investigation. Select one. • Interventional: studies in human beings in which individuals are assigned by an investigator based on a protocol to receive specific interventions. Subjects may receive diagnostic, therapeutic or other types of interventions. The assignment of the intervention may or may not be random. The individuals are then followed and …						Study Type * FDAAA Definition: Nature of the investigation. Select one. Interventional: studies in human beings in which individuals are assigned by an investigator based on a protocol to receive specific interventions. Subjects may receive diagnostic, therapeutic or other types of interventions. The assignment of the intervention may or may not be random. The individuals are then followed and bi…	inserted "* FDAAA"	Study Type Definition: Nature of the investigation. Select one. • Interventional: studies in human beings in which individuals are assigned by an investigator based on a protocol to receive specific interventions. Subjects may receive diagnostic, therapeutic or other types of interventions. The assignment of the intervention may or may not be random. The individuals are then followed and biomedic…	deleted " * " under Interventional, changed "assigned to receive" to "assigned by an investigator based on a protocol to receive" under Observational, changed "in a pre-defined group" to "in pre-defined groups" under Expanded Access, changed "patients who are failing on currently available treatments for their condition and also are unable to participate in ongoing clinical trials" to "patients w…											Study Type * Definition: Nature of the investigation. Select one. • Interventional: studies in human beings in which individuals are assigned to receive specific interventions. Subjects may receive diagnostic, therapeutic or other types of interventions. The assignment of the intervention may or may not be random. The individuals are then followed and biomedical and/or health outcomes are assesse…	inserted "Expanded Access: records describing the procedure for obtaining an experimental drug or device for patients who are failing on currently available treatments for their condition and also are unable to participate in ongoing clinical trials. Expanded Access records are used to register all types of non-protocol access to experimental treatments, including protocol exception, single-patie…					Study Type * Definition: Nature of the investigation. Select one. • Interventional: studies in human beings in which individuals are assigned to receive specific interventions. Subjects may receive diagnostic, therapeutic or other types of interventions. The assignment of the intervention may or may not be random. The individuals are then followed and biomedical and/or health outcomes are assesse…	under Study Type, inserted "*" under Observational, in middle of paragraph, deleted "*" (stray typo in middle of paragraph)	Study Type Definition: Nature of the investigation. Select one. • Interventional: studies in human beings in which individuals are assigned to receive specific interventions. Subjects may receive diagnostic, therapeutic or other types of interventions. The assignment of the intervention may or may not be random. The individuals are then followed and biomedical and/or health outcomes are assessed.…	changed "• Interventional: experimental studies in humans to investigate the safety and/or efficacy of a drug, gene therapy, vaccine, behavior, device, or procedure. • Observational: studies in humans that record specific events occurring in a defined population without any intervention by the researcher, such as natural history, screening, and psychosocial studies. " to "• Interventional: studie…			Study Type Definition: Nature of the investigation. Select one. • Interventional: experimental studies in humans to investigate the safety and/or efficacy of a drug, gene therapy, vaccine, behavior, device, or procedure. • Observational: studies in humans that record specific events occurring in a defined population without any intervention by the researcher, such as natural history, screening, a…	deleted "Submission: Required"					Study Type Submission: Required Definition: Nature of the investigation. Select one. • Interventional: experimental studies in humans to investigate the safety and/or efficacy of a drug, gene therapy, vaccine, behavior, device, or procedure. • Observational: studies in humans that record specific events occurring in a defined population without any intervention by the researcher, such as natural …	inserted "Submission: Required"			Study Type Definition: Nature of the investigation. Select one. o Interventional: experimental studies in humans to investigate the safety and/or efficacy of a drug, gene therapy, vaccine, behavior, device, or procedure. o Observational: studies in humans that record specific events occurring in a defined population without any intervention by the researcher, such as natural history, screening, a…	under Interventional, changed "the safety and/or efficacy of a product" to "the safety and/or efficacy of a drug, gene therapy, vaccine, behavior, device, or procedure" under Observational, changed "studies in humans not specifically designed to test the safety and/or efficacy of a product" to "studies in humans that record specific events occurring in a defined population without any interventio…	Study Type Definition: Nature of the investigation. Select one. o Interventional: experimental studies in humans to investigate the safety and/or efficacy of a product. o Observational: studies in humans not specifically designed to test the safety and/or efficacy of a product.
verification_date	CLINICAL_STUDY	Record Verification Date	Record Verification Date * FDAAA Definition: Date the protocol information was last verified. Verification date is shown along with organization name on ClinicalTrials.gov to indicate to the public whether the information is being kept current, particularly recruiting status and contact information. Update verification date when reviewing the record for accuracy and completeness, even if no other…						Record Verification Date * FDAAA Definition: Date the protocol information was last verified. Verification date is shown along with organization name on ClinicalTrials.gov to indicate to the public whether the information is being kept current, particularly recruiting status and contact information. Update verification date when reviewing the record for accuracy and completeness, even if no other…	inserted "* FDAAA"	Record Verification Date Definition: Date the protocol information was last verified. Verification date is shown along with organization name on ClinicalTrials.gov to indicate to the public whether the information is being kept current, particularly recruiting status and contact information. Update verification date when reviewing the record for accuracy and completeness, even if no other changes…	deleted "*"													Record Verification Date * Definition: Date the protocol information was last verified. Verification date is shown along with organization name on ClinicalTrials.gov to indicate to the public whether the information is being kept current, particularly recruiting status and contact information. Update verification date when reviewing the record for accuracy and completeness, even if no other chang…	changed "Date the protocol information, including recruiting status, was last verified, whether changes were made or not." to "Date the protocol information was last verified. Verification date is shown along with organization name on ClinicalTrials.gov to indicate to the public whether the information is being kept current, particularly recruiting status and contact information. Update verificat…			Record Verification Date * Definition: Date the protocol information, including recruiting status, was last verified, whether changes were made or not.	inserted "*"					Record Verification Date Definition: Date the protocol information, including recruiting status, was last verified, whether changes were made or not.	changed "Verification Date" to "Record Verification Date" deleted "Submission: Required" changed "including status" to "including recruiting status" changed "are" to "were"					Verification Date Submission: Required Definition: Date the protocol information, including status, was last verified, whether changes are made or not.	inserted "Submission: Required"	Verification Date Definition: Date the protocol information, including status, was last verified, whether changes are made or not.
why_stopped	CLINICAL_STUDY	Why Study Stopped	Why Study Stopped? Definition: For suspended, terminated or withdrawn studies, provide a brief explanation of why the study has been halted or terminated. If desired, use brief summary or detailed description to provide additional information. (Limit: 160 characters)	inserted "(Limit: 160 characters)"																	Why Study Stopped? Definition: For suspended, terminated or withdrawn studies, provide a brief explanation of why the study has been halted or terminated. If desired, use brief summary or detailed description to provide additional information.	inserted new item, "Why Study Stopped? Definition: For suspended, terminated or withdrawn studies, provide a brief explanation of why the study has been halted or terminated. If desired, use brief summary or detailed description to provide additional information."
condition	CONDITIONS	Condition	Conditions and Keywords Conditions or Focus of Study * FDAAA Definition: Primary disease or condition being studied, or focus of the study. Diseases or conditions should use the National Library of Medicine's Medical Subject Headings (MeSH) controlled vocabulary when possible.						Conditions or Focus of Study * FDAAA Definition: Primary disease or condition being studied, or focus of the study. Diseases or conditions should use the National Library of Medicine's Medical Subject Headings (MeSH) controlled vocabulary when possible.	inserted "* FDAAA"	Conditions or Focus of Study Definition: Primary disease or condition being studied, or focus of the study. Diseases or conditions should use the National Library of Medicine's Medical Subject Headings (MeSH) controlled vocabulary when possible.	deleted "*"									Conditions or Focus of Study * Definition: Primary disease or condition being studied, or focus of the study. Diseases or conditions should use the National Library of Medicine's Medical Subject Headings (MeSH) controlled vocabulary when possible.	changed "Conditions" to "Conditions or Focus of Study" changed Definition from "Primary disease or condition being studied, using the National Library of Medicine's Medical Subject Headings (MeSH) controlled vocabulary. The condition field is used to index studies in ClinicalTrials.gov." to "Primary disease or condition being studied, or focus of the study. Diseases or conditions should use the N…					Conditions and Keywords Conditions * Definition: Primary disease or condition being studied, using the National Library of Medicine's Medical Subject Headings (MeSH) controlled vocabulary. The condition field is used to index studies in ClinicalTrials.gov.	changed "diseases or conditions" to "disease or condition" changed "The conditions are used" to "The condition field is used" deleted "Select up to five disease or condition terms."	Conditions and Keywords Conditions * Definition: Primary diseases or conditions being studied, using the National Library of Medicine's Medical Subject Headings (MeSH) controlled vocabulary. The conditions are used to index studies in ClinicalTrials.gov. Select up to five disease or condition terms.	inserted "*"					Conditions Definition: Primary diseases or conditions being studied, using the National Library of Medicine's Medical Subject Headings (MeSH) controlled vocabulary. The conditions are used to index studies in ClinicalTrials.gov. Select up to five disease or condition terms.	deleted "Submission: Required"					Conditions Submission: Required Definition: Primary diseases or conditions being studied, using the National Library of Medicine's Medical Subject Headings (MeSH) controlled vocabulary. The conditions are used to index studies in ClinicalTrials.gov. Select up to five disease or condition terms.	inserted "Submission: Required" deleted "from the following MeSH categories: Diseases (C), Behavior and Behavior Modification (F01), and Mental Disorders (F03)"			Conditions Definition: Primary diseases or conditions being studied, using the National Library of Medicine's Medical Subject Headings (MeSH) controlled vocabulary. The conditions are used to index studies in ClinicalTrials.gov. Select up to five disease or condition terms from the following MeSH categories: Diseases (C), Behavior and Behavior Modification (F01), and Mental Disorders (F03).	changed "as defined in" to "using" changed "terms from MeSH" to "terms from the following MeSH categories: Diseases (C), Behavior and Behavior Modification (F01), and Mental Disorders (F03)."	Conditions Definition: Primary diseases or conditions being studied, as defined in the National Library of Medicine's Medical Subject Headings (MeSH) controlled vocabulary. The conditions are used to index studies in ClinicalTrials.gov. Select up to five disease or condition terms from MeSH.
condition_id	CONDITIONS
nct_id	CONDITIONS	ClinicalTrials.gov registry number	Definition not found
design_id	DESIGNS
design_name	DESIGNS	Design Name (includes Primary purpose, Intervention Model, Masking, Allocation, Study Classification, Observational Study Model, Time perspective, and Control)	Interventional Study Design * (FDAAA) Definition: Primary investigative techniques used in the protocol. Select the most appropriate term describing the protocol from each of the following data elements. Primary Purpose FDAAA - reason for the protocol • Treatment: protocol designed to evaluate one or more interventions for treating a disease, syndrome or condition • Prevention: protocol designed …						Interventional Study Design * (FDAAA) Definition: Primary investigative techniques used in the protocol. Select the most appropriate term describing the protocol from each of the following data elements. Primary Purpose FDAAA - reason for the protocol • Treatment: protocol designed to evaluate one or more interventions for treating a disease, syndrome or condition • Prevention: protocol designed …	under Interventional Study Design, inserted "* (FDAAA)" under Primary Purpose, inserted "FDAAA" under Intervention Model, inserted "(FDAAA) (at least one of the following required: Intervention Model, Masking, Allocation. All may be required as part of Study Design under PL 110-85, Section 801)" under Masking, inserted "(FDAAA) (at least one of the following required: Intervention Model, Masking,…	Primary Purpose - reason for the protocol • Treatment: protocol designed to evaluate one or more interventions for treating a disease, syndrome or condition • Prevention: protocol designed to assess one or more interventions aimed at preventing the development of a specific disease or health condition • Diagnostic: protocol designed to evaluate one or more interventions aimed at identifying a dis…	under Primary Purpose, deleted " * " under Supportive Care, changed "designed to evaluation interventions" to "designed to evaluate one or more interventions" under Health Services Research, changed "protocol design to evaluate" to "protocol designed to evaluate" changed "Study Design" to "Intervention Model" under Masking, deleted " * " under Double Blind, changed "both participants" to "two or …	Study Characteristics Interventional Study Characteristics Definition: Primary investigative techniques used in the protocol. Select the most appropriate term describing the protocol from each of the following categories. Primary Purpose * - reason for the protocol • Treatment: protocol designed to evaluate one or more interventions for treating a disease, syndrome or condition • Prevention: prot…	inserted "Study Classification (formerly Endpoint) - type of primary outcome or endpoint that the protocol is designed to evaluate. Select one. • N/A: not applicable • Safety: show if the drug is safe under conditions of proposed use • Efficacy: measure of an intervention's influence on a disease or health condition • Safety/Efficacy • Bio-equivalence: scientific basis for comparing generic and b…	Study Characteristics Interventional Study Characteristics Definition: Primary investigative techniques used in the protocol. Select the most appropriate term describing the protocol from each of the following categories. Primary Purpose * - reason for the protocol • Treatment: protocol designed to evaluate one or more interventions for treating a disease, syndrome or condition • Prevention: prot…	deleted "Control - nature of the intervention control • Placebo: participants may receive only placebo throughout the course of the protocol • Active: participants may receive some form of treatment (e.g., standard treatment) in place of the intervention under investigation • Uncontrolled: no controls are used • Historical: the control consists of results from past studies • Dose Comparison: part…	Study Characteristics Interventional Study Characteristics Definition: Primary investigative techniques used in the protocol. Select the most appropriate term describing the protocol from each of the following categories. Primary Purpose * - reason for the protocol • Treatment: protocol designed to evaluate one or more interventions for treating a disease, syndrome or condition • Prevention: prot…	under Masking, inserted "If Single Blind or Double Blind is selected, check the role(s) that are to be masked: Subject, Caregiver, Investigator or Outcomes Assessor."	Study Characteristics Interventional Study Characteristics Definition: Primary investigative techniques used in the protocol. Select the most appropriate term describing the protocol from each of the following categories. Primary Purpose * - reason for the protocol • Treatment: protocol designed to evaluate one or more interventions for treating a disease, syndrome or condition • Prevention: prot…	under Interventional Study Characteristics, changed "the six categories: Purpose, Allocation, Masking, Control, Assignment, and Endpoint" to "the following categories" under Primary Purpose, changed "Diagnosis" to "Diagnostic" under Primary Purpose, deleted bullet "• Educational/Counseling/Training: protocol designed to assess one or more interventions in an educational, counseling or training en…	Study Characteristics Interventional Study Characteristics Definition: Primary investigative techniques used in the protocol. Select the most appropriate term describing the protocol from each of the six categories: Purpose, Allocation, Masking, Control, Assignment, and Endpoint. Primary Purpose * - reason for the protocol • Treatment: protocol designed to evaluate one or more interventions for t…	changed "Study Design" to "Study Characteristics" changed "Study Type (Interventional)" to "Interventional Study Characteristics" changed "Purpose - reason for the protocol" to "Primary Purpose - reason for the protocol" - twice (once under Interventional, once under Observational) inserted "• Basic Science: protocol designed to examine the basic mechanism of action (e.g., physiology, biomechanic…	Study Design Study Type (Interventional) Definition: Primary investigative techniques used in the protocol. Select the most appropriate term describing the protocol from each of the six categories: Purpose, Allocation, Masking, Control, Assignment, and Endpoint. Purpose * - reason for the protocol • Treatment: protocol designed to evaluate one or more interventions for treating a disease, syndrom…	deleted "Expanded Access: includes treatment IND protocols"	Study Design Study Type (Interventional) Definition: Primary investigative techniques used in the protocol. Select the most appropriate term describing the protocol from each of the six categories: Purpose, Allocation, Masking, Control, Assignment, and Endpoint. Purpose * - reason for the protocol • Treatment: protocol designed to evaluate one or more interventions for treating a disease, syndrom…	under Study Type (Interventional) Purpose, inserted "• Supportive Care: protocol designed to evaluation interventions where the primary intent is to maximize comfort, minimize side effects or mitigate against a decline in the subject's health or function. In general, supportive care interventions are not intended to cure a disease. • Screening: protocol designed to assess or examine methods of id…			Study Design Study Type (Interventional) Definition: Primary investigative techniques used in the protocol. Select the most appropriate term describing the protocol from each of the six categories: Purpose, Allocation, Masking, Control, Assignment, and Endpoint. Purpose * - reason for the protocol • Treatment: protocol designed to evaluate one or more interventions for treating a disease, syndrom…	under Study Type (Interventional) Purpose and Allocation and Masking and Control and Assignment, inserted "*" under Study Type (Observational) Duration and Selection and Timing, inserted "*"					Study Design Study Type (Interventional) Definition: Primary investigative techniques used in the protocol. Select the most appropriate term describing the protocol from each of the six categories: Purpose, Allocation, Masking, Control, Assignment, and Endpoint. Purpose: reason for the protocol • Treatment: protocol designed to evaluate one or more interventions for treating a disease, syndrome, …	under Study Type (Interventional) and Study Type (Interventional) Purpose and Study Type (Observational) and Study Type (Observational) Purpose, deleted "Submission: Required" under Allocation and Masking and Control and Assignment and Endpoint and Duration and Selection and Timing, deleted "Submission: Optional" WHICH ALSO HAS ITS OWN SEPARATE ROWS IN THIS SPREADSHEET to match the eventual 2010 …	Study Design Study Type (Interventional) Submission: Required Definition: Primary investigative techniques used in the protocol. Select the most appropriate term describing the protocol from each of the six categories: Purpose, Allocation, Masking, Control, Assignment, and Endpoint. Purpose: reason for the protocol Submission: Required • Treatment: protocol designed to evaluate one or more interv…	under Control, changed "None" to "Uncontrolled" under Assignment, changed "received some intervention" to "received an intervention" inserted new bullet, "• Expanded Access: includes treatment IND protocols"	Study Design Study Type (Interventional) Submission: Required Definition: Primary investigative techniques used in the protocol. Select the most appropriate term describing the protocol from each of the six categories: Purpose, Allocation, Masking, Control, Assignment, and Endpoint. Purpose: reason for the protocol Submission: Required • Treatment: protocol designed to evaluate one or more interv…	under Allocation and Masking and Control and Assignment and Endpoint and Duration and Selection and Timing, changed "Required" to "Optional"	Study Design Study Type (Interventional) Submission: Required Definition: Primary investigative techniques used in the protocol. Select the most appropriate term describing the protocol from each of the six categories: Purpose, Allocation, Masking, Control, Assignment, and Endpoint. Purpose: reason for the protocol Submission: Required • Treatment: protocol designed to evaluate one or more interv…	inserted "Submission: Required" - all subsections under Endpoint Safety, changed "shows" to "show if"			Purpose: reason for the protocol  Treatment: protocol designed to evaluate one or more interventions for treating a disease, syndrome, or condition  Prevention: protocol designed to assess one or more interventions aimed at preventing the development of a specific disease or health condition  Diagnosis: protocol designed to evaluate one or more interventions aimed at identifying a disease or h…	changed "subject"/"subjects" to "participant"/"participants" - multiple times under Study Type (Investigational)/Purpose/Diagnosis, inserted "or health condition" under Allocation, changed "purposively" to "expressly" under Masking/Open, changed "the intervention" to "the intervention assignment" under Control, changed "protocol control" to "intervention control" under Endpoint, changed "type of …	Study Design Study Type (Interventional) Definition: Primary investigative techniques used in the protocol. Select the most appropriate term describing the protocol from each of the six categories: Purpose, Allocation, Masking, Control, Assignment, and Endpoint. Purpose: reason for the protocol  Treatment: protocol designed to evaluate one or more interventions for treating a disease, syndrome, …
design_value	DESIGNS	Design Value (includes enumerated values for each of the 'Design Name' category)	value of design name choices above [meaning the Design Name definition immediately above, already includes the several value choices listed under the many design items]
masked_role	DESIGNS	Masked Role	Included in "Design name"_x000D_ _x000D_ Masking (FDAAA) (at least one of the following required: Intervention Model, Masking, Allocation. All may be required as part of Study Design under PL 110-85, Section 801) - knowledge of intervention assignments * Open: no masking is used. All involved know the identity of the intervention assignment. * Single Blind: one party, either the investigator or p…						Masking (FDAAA) (at least one of the following required: Intervention Model, Masking, Allocation. All may be required as part of Study Design under PL 110-85, Section 801) - knowledge of intervention assignments * Open: no masking is used. All involved know the identity of the intervention assignment. * Single Blind: one party, either the investigator or participant, is unaware of the interventio…	inserted "(FDAAA)"
nct_id	DESIGNS	ClinicalTrials.gov registry number
facility_id	FACILITIES
location_id	FACILITIES
name	FACILITIES	Facility Name	If Overall Status is "Recruiting": • At least one location must be specified. • At least one location must have status set to "Recruiting". • All locations must have status specified. • Either any location that is recruiting must have Contact specified, or Overall Contact must be specified. Multiple locations may be specified. Location is composed of the following fields. Facility * (FDAAA) Name:…	inserted "If Overall Status is "Recruiting": • At least one location must be specified. • At least one location must have status set to "Recruiting". • All locations must have status specified. • Either any location that is recruiting must have Contact specified, or Overall Contact must be specified." inserted "(Limit: 254 characters)"					Multiple locations may be specified. Location is composed of the following fields. Facility * (FDAAA) • Name: Full name of the organization where the protocol is being conducted. Examples: UCLA Eye Institute; Springfield Memorial Hospital	inserted "* (FDAAA)"	Multiple locations may be specified. Location is composed of the following fields. Facility Name: Full name of the organization where the protocol is being conducted. Examples: UCLA Eye Institute; Springfield Memorial Hospital	deleted "*"																	Multiple locations may be specified. Location is composed of the following fields. Facility * Name: Full name of the organization where the protocol is being conducted. Examples: UCLA Eye Institute; Springfield Memorial Hospital	inserted "*"					Multiple locations may be specified. Location is composed of the following fields. Facility Name: Full name of the organization where the protocol is being conducted. Examples: UCLA Eye Institute; Springfield Memorial Hospital	deleted "Submission: Required"					Multiple locations may be specified. Location is composed of the following fields. Facility Submission: Required Name: Full name of the organization where the protocol is being conducted. Examples: UCLA Eye Institute; Springfield Memorial Hospital	inserted "Submission: Required"	Multiple locations may be specified. Location is composed of the following fields. Facility Name: Full name of the organization where the protocol is being conducted. Examples: UCLA Eye Institute; Springfield Memorial Hospital
nct_id	FACILITIES	ClinicalTrials.gov registry number	Definition not found
arm_group_label	INTERVENTION_ARM_GROUPS	Intervention Arms/Groups Label	Arms/Groups * (FDAAA) - if arms or groups have been specified for the protocol, select the ones for which the intervention is to be administered. For interventional studies with arms specified, all arms must have at least one intervention (unless arm type is "No Intervention") and each intervention must be assigned to at least one arm. For observational studies with groups specified, each interve…						Arms/Groups * (FDAAA) - if arms or groups have been specified for the protocol, select the ones for which the intervention is to be administered. For interventional studies with arms specified, all arms must have at least one intervention (unless arm type is "No Intervention") and each intervention must be assigned to at least one arm. For observational studies with groups specified, each interve…	inserted "* (FDAAA)"									Arms/Groups - if arms or groups have been specified for the protocol, select the ones for which the intervention is to be administered. For interventional studies with arms specified, all arms must have at least one intervention (unless arm type is "No Intervention") and each intervention must be assigned to at least one arm. For observational studies with groups specified, each intervention (if …	inserted new item "Arms/Groups - if arms or groups have been specified for the protocol, select the ones for which the intervention is to be administered. For interventional studies with arms specified, all arms must have at least one intervention (unless arm type is "No Intervention") and each intervention must be assigned to at least one arm. For observational studies with groups specified, eac…
int_arm_group_id	INTERVENTION_ARM_GROUPS
intervention_id	INTERVENTION_ARM_GROUPS
nct_id	INTERVENTION_ARM_GROUPS	ClinicalTrials.gov registry number	Definition not found
int_other_name_id	INTERVENTION_OTHER_NAMES
intervention_id	INTERVENTION_OTHER_NAMES
nct_id	INTERVENTION_OTHER_NAMES	ClinicalTrials.gov registry number	Definition not found
other_name	INTERVENTION_OTHER_NAMES	Other names	Other Names - list other names used to identify the intervention, past or present (e.g., brand name for a drug). These names will be used to improve search results in ClinicalTrials.gov. (Limit: 160 characters per name)	inserted "(Limit: 160 characters per name)"															Other Names - list other names used to identify the intervention, past or present (e.g., brand name for a drug). These names will be used to improve search results in ClinicalTrials.gov.	inserted new item "Other Names - list other names used to identify the intervention, past or present (e.g., brand name for a drug). These names will be used to improve search results in ClinicalTrials.gov."
description	INTERVENTIONS	Intervention Description	Intervention Description (FDAAA) - cover key details of the intervention. Must be sufficiently detailed to distinguish between arms of a study (e.g., comparison of different dosages of drug) and/or among similar interventions (e.g., comparison of multiple implantable cardiac defibrillators). For example, interventions involving drugs may include dosage form, dosage, frequency and duration. (Limit…	inserted "(Limit: 1600 characters)"					Intervention Description (FDAAA) - cover key details of the intervention. Must be sufficiently detailed to distinguish between arms of a study (e.g., comparison of different dosages of drug) and/or among similar interventions (e.g., comparison of multiple implantable cardiac defibrillators). For example, interventions involving drugs may include dosage form, dosage, frequency and duration. Exampl…	inserted "(FDAAA)" changed "For drugs include dosage form, dosage, frequency and duration." to "Must be sufficiently detailed to distinguish between arms of a study (e.g., comparison of different dosages of drug) and/or among similar interventions (e.g., comparison of multiple implantable cardiac defibrillators). For example, interventions involving drugs may include dosage form, dosage, frequenc…									Intervention Description - cover key details of the intervention. For drugs include dosage form, dosage, frequency and duration. Example: 50 mg/m2, IV (in the vein) on day 5 of each 28 day cycle. Number of Cycles: until progression or unacceptable toxicity develops.	inserted new item "Intervention Description - cover key details of the intervention. For drugs include dosage form, dosage, frequency and duration. Example: 50 mg/m2, IV (in the vein) on day 5 of each 28 day cycle. Number of Cycles: until progression or unacceptable toxicity develops."
intervention_id	INTERVENTIONS
intervention_name	INTERVENTIONS	Intervention Name	Intervention Name * FDAAA - for drugs use generic name; for other types of interventions provide a brief descriptive name. (Limit: 160 characters) For investigational new drugs that do not yet have a generic name, a chemical name, company code or serial number may be used on a temporary basis. As soon as the generic name has been established, update the associated protocol records accordingly. Fo…	inserted "(Limit: 160 characters)"					Intervention Name * FDAAA - for drugs use generic name; for other types of interventions provide a brief descriptive name. For investigational new drugs that do not yet have a generic name, a chemical name, company code or serial number may be used on a temporary basis. As soon as the generic name has been established, update the associated protocol records accordingly. For non-drug intervention …	inserted "* FDAAA" inserted "For non-drug intervention types, provide an intervention name with sufficient detail so that it can be distinguished from other similar interventions."	Intervention Name - for drugs use generic name; for other types of interventions provide a brief descriptive name. For investigational new drugs that do not yet have a generic name, a chemical name, company code or serial number may be used on a temporary basis. As soon as the generic name has been established, update the associated protocol records accordingly.	deleted "*"			Intervention Name * - for drugs use generic name; for other types of interventions provide a brief descriptive name. For investigational new drugs that do not yet have a generic name, a chemical name, company code or serial number may be used on a temporary basis. As soon as the generic name has been established, update the associated protocol records accordingly.	changed "generic name of the precise intervention being studied" to "for drugs use generic name; for other types of interventions provide a brief descriptive name"			Intervention Name * - generic name of the precise intervention being studied For investigational new drugs that do not yet have a generic name, a chemical name, company code or serial number may be used on a temporary basis. As soon as the generic name has been established, update the associated protocol records accordingly.	deleted "Examples: Zidovudine (drug) Self-hypnotic relaxation (behavior)"			Intervention Name * - generic name of the precise intervention being studied For investigational new drugs that do not yet have a generic name, a chemical name, company code or serial number may be used on a temporary basis. As soon as the generic name has been established, update the associated protocol records accordingly. Examples: Zidovudine (drug) Self-hypnotic relaxation (behavior)	inserted "For investigational new drugs that do not yet have a generic name, a chemical name, company code or serial number may be used on a temporary basis. As soon as the generic name has been established, update the associated protocol records accordingly."					Intervention Name * - generic name of the precise intervention being studied Examples: Zidovudine (drug) Self-hypnotic relaxation (behavior)	inserted "*"											Intervention Name Definition: generic name of the precise intervention being studied Examples: Zidovudine (drug) Self-hypnotic relaxation (behavior)	changed "Exercise" to "Self-hypnotic relaxation"					Intervention Name Definition: generic name of the precise intervention being studied Examples: Zidovudine (drug) Exercise (behavior)	changed "Example: Zidovudine" to "Examples: Zidovudine (drug) Exercise (behavior)"	Intervention Name Definition: generic name of the precise intervention being studied Example: Zidovudine
intervention_type	INTERVENTIONS	Intervention Type	For all studies, and for expanded access records, specify the associated intervention(s). For interventional studies, at least one intervention must be specified. Intervention Type * FDAAA - select one per intervention • Drug (including placebo) • Device (including sham) • Biological/Vaccine • Procedure/Surgery • Radiation • Behavioral (e.g., Psychotherapy, Lifestyle Counseling) • Genetic (includ…	inserted "For interventional studies, at least one intervention must be specified."					For all studies, and for expanded access records, specify the associated intervention(s). Intervention Type * FDAAA - select one per intervention • Drug (including placebo) • Device (including sham) • Biological/Vaccine • Procedure/Surgery • Radiation • Behavioral (e.g., Psychotherapy, Lifestyle Counseling) • Genetic (including gene transfer, stem cell and recombinant DNA) • Dietary Supplement (e…	inserted "* FDAAA"	For all studies, and for expanded access records, specify the associated intervention(s). Intervention Type - select one per intervention • Drug (including placebo) • Device (including sham) • Biological/Vaccine • Procedure/Surgery • Radiation • Behavioral (e.g., Psychotherapy, Lifestyle Counseling) • Genetic (including gene transfer, stem cell and recombinant DNA) • Dietary Supplement (e.g., vit…	deleted "*" under Drug, inserted "(including placebo)" under Device, inserted "(including sham)"							For all studies, and for expanded access records, specify the associated intervention(s). Intervention Type * - select one per intervention • Drug • Device • Biological/Vaccine • Procedure/Surgery • Radiation • Behavioral (e.g., Psychotherapy, Lifestyle Counseling) • Genetic (including gene transfer, stem cell and recombinant DNA) • Dietary Supplement (e.g., vitamins, minerals) • Other	changed "Definition: Primary interventions being studied. Provide specific name and type for each intervention (up to 10 items). Intervention Type * - select one per intervention • Drug • Gene Transfer - including gene transfer and recombinant DNA (e.g., Human nerve growth factor) • Vaccine • Behavior (e.g., Protein and calorie controlled diet; Self-hypnotic relaxation) • Device (e.g., Defibrilla…									Interventions Definition: Primary interventions being studied. Provide specific name and type for each intervention (up to 10 items). Intervention Type * - select one per intervention • Drug • Gene Transfer - including gene transfer and recombinant DNA (e.g., Human nerve growth factor) • Vaccine • Behavior (e.g., Protein and calorie controlled diet; Self-hypnotic relaxation) • Device (e.g., Defib…	under Intervention Type, inserted "*"					Interventions Definition: Primary interventions being studied. Provide specific name and type for each intervention (up to 10 items). Intervention Type: select one per intervention • Drug • Gene Transfer - including gene transfer and recombinant DNA (e.g., Human nerve growth factor) • Vaccine • Behavior (e.g., Protein and calorie controlled diet; Self-hypnotic relaxation) • Device (e.g., Defibril…	deleted "Submission: Required."					Interventions Submission: Required Definition: Primary interventions being studied. Provide specific name and type for each intervention (up to 10 items). Intervention Type: select one per intervention • Drug • Gene Transfer - including gene transfer and recombinant DNA (e.g., Human nerve growth factor) • Vaccine • Behavior (e.g., Protein and calorie controlled diet; Self-hypnotic relaxation) • D…	inserted "Submission: Required" under Gene Transfer, inserted "(e.g., Human nerve growth factor)" under Behavior, inserted "(e.g., Protein and calorie controlled diet; Self-hypnotic relaxation)" under Device, inserted "(e.g., Defibrillators, implantable; Electronic medication reminder system)" under Procedure, inserted "(e.g., Adenoidectomy; Bronchoalveolar lavage)"	Interventions Definition: Primary interventions being studied. Provide specific name and type for each intervention (up to 10 items). Intervention Type: select one per intervention o Drug o Gene Transfer - including gene transfer and recombinant DNA o Vaccine o Behavior o Device o Procedure
nct_id	INTERVENTIONS	ClinicalTrials.gov registry number	Definition not found
keyword	KEYWORDS	Keywords	Keywords Definition: Words or phrases that best describe the protocol. Keywords help users find studies in the database. Use NLM's Medical Subject Heading (MeSH) controlled vocabulary terms where appropriate. Be as specific and precise as possible. Avoid acronyms and abbreviations.																																Keywords Definition: Words or phrases that best describe the protocol. Keywords help users find studies in the database. Use NLM's Medical Subject Heading (MeSH) controlled vocabulary terms where appropriate. Be as specific and precise as possible. Avoid acronyms and abbreviations.	deleted "Submission: Optional"					Keywords Submission: Optional Definition: Words or phrases that best describe the protocol. Keywords help users find studies in the database. Use NLM's Medical Subject Heading (MeSH) controlled vocabulary terms where appropriate. Be as specific and precise as possible. Avoid acronyms and abbreviations.	changed "(if desired)" to "Submission: Optional"			Keywords (if desired) Definition: Words or phrases that best describe the protocol. Keywords help users find studies in the database. Use NLM's Medical Subject Heading (MeSH) controlled vocabulary terms where appropriate. Be as specific and precise as possible. Avoid acronyms and abbreviations.	changed "Keywords are used to help" to "Keywords help" changed "Medical Subjects Heading" to "Medical Subject Heading"	Keywords (if desired) Definition: Words or phrases that best describe the protocol. Keywords are used to help users find studies in the database. Use NLM's Medical Subjects Heading (MeSH) controlled vocabulary terms where appropriate. Be as specific and precise as possible. Avoid acronyms and abbreviations.
keyword_id	KEYWORDS
nct_id	KEYWORDS	ClinicalTrials.gov registry number	Definition not found
description	LINKS	Description	Description Definition: title or brief description of the linked page. If the page being linked is the protocol's home page on the sponsor's Web site, include the words "Click here for more information about this study:" and provide the name of the protocol. (Limit: 254 characters) Examples: Click here for more information about this study: Clinical Trial of Eye Prophylaxis in the Newborn The Alz…	inserted "(Limit: 254 characters)"																															Description Definition: title or brief description of the linked page. If the page being linked is the protocol's home page on the sponsor's Web site, include the words "Click here for more information about this study:" and provide the name of the protocol. Examples: Click here for more information about this study: Clinical Trial of Eye Prophylaxis in the Newborn The Alzheimer's Disease Educati…	deleted "Submission: Optional"					Description Submission: Optional Definition: title or brief description of the linked page. If the page being linked is the protocol's home page on the sponsor's Web site, include the words "Click here for more information about this study:" and provide the name of the protocol. Examples: Click here for more information about this study: Clinical Trial of Eye Prophylaxis in the Newborn The Alzhei…	inserted "Submission: Optional" deleted "REFERENCES ________________________________________ • Code of Federal Regulations, Title21 (CFR 21) • HCFA Medicare Coverage Policy ~ Clinical Trials: Final National Coverage Decision (http://www.hcfa.gov/coverage/8d2.htm)"	Description Definition: title or brief description of the linked page. If the page being linked is the protocol's home page on the sponsor's Web site, include the words "Click here for more information about this study:" and provide the name of the protocol. Examples:  Click here for more information about this study: Clinical Trial of Eye Prophylaxis in the Newborn.  The Alzheimer's Disease Ed…
link_id	LINKS																																												Links Definition: Web sites related to the study may be entered, if desired. Do not include sites whose primary goal is to advertise or sell commercial products or services.	changed "Pointers to Web pages directly relevant to the protocol." to "Web sites related to the study may be entered, if desired." changed "Do not link to sites whose primary goal is to advertise or sell commercial products or services. Ensure that the links do not misbrand products (e.g., by promoting a product pre-approval or off-label)." to "Do not include sites whose primary goal is to advert…	Links Definition: Pointers to Web pages directly relevant to the protocol. Provide up to 5 suggested links. Do not link to sites whose primary goal is to advertise or sell commercial products or services. Ensure that the links do not misbrand products (e.g., by promoting a product pre-approval or off-label).
nct_id	LINKS	ClinicalTrials.gov registry number	Definition not found
url	LINKS	URL	Links Definition: A Web site directly relevant to the protocol may be entered, if desired. Do not include sites whose primary goal is to advertise or sell commercial products or services. Links to educational, research, government, and other non-profit Web pages are acceptable. All submitted links are subject to review by ClinicalTrials.gov. URL Definition: complete URL, including http:// (Limit:…	under URL, inserted "(Limit: 254 characters)"																															Links Definition: A Web site directly relevant to the protocol may be entered, if desired. Do not include sites whose primary goal is to advertise or sell commercial products or services. Links to educational, research, government, and other non-profit Web pages are acceptable. All submitted links are subject to review by ClinicalTrials.gov. URL Definition: complete URL, including http:// Example…	under Links, deleted "Submission: Optional" under URL, deleted "Submission: Optional"	Links Submission: Optional Definition: A Web site directly relevant to the protocol may be entered, if desired. Do not include sites whose primary goal is to advertise or sell commercial products or services. Links to educational, research, government, and other non-profit Web pages are acceptable. All submitted links are subject to review by ClinicalTrials.gov. URL Submission: Optional Definitio…	under Links, inserted "Links to educational, research, government, and other non-profit Web pages are acceptable. All submitted links are subject to review by ClinicalTrials.gov."			Links Submission: Optional Definition: A Web site directly relevant to the protocol may be entered, if desired. Do not include sites whose primary goal is to advertise or sell commercial products or services. URL Submission: Optional Definition: complete URL, including http:// Example: http://www.alzheimers.org/	under Links, inserted "Submission: Optional" changed "Web sites related to the study" to "A Web site directly relevant to the protocol" under URL, inserted "Submission: Optional"			Links Definition: Web sites related to the study may be entered, if desired. Do not include sites whose primary goal is to advertise or sell commercial products or services. URL Definition: complete URL, including http:// Example: http://www.alzheimers.org/	under Links, changed "Pointers to Web pages directly relevant to the protocol. Provide up to 5 suggested links. Do not link to sites whose primary goal is to advertise or sell commercial products or services. Ensure that the links do not misbrand products (e.g., by promoting a product pre-approval or off-label)." to "Web sites related to the study may be entered, if desired. Do not include sites …	Links Definition: Pointers to Web pages directly relevant to the protocol. Provide up to 5 suggested links. Do not link to sites whose primary goal is to advertise or sell commercial products or services. Ensure that the links do not misbrand products (e.g., by promoting a product pre-approval or off-label). URL Definition: complete URL, including http:// Example: http://www.alzheimers.org/	under Links, inserted "Ensure that the links do not misbrand products (e.g., by promoting a product pre-approval or off-label)."	Links Definition: Pointers to Web pages directly relevant to the protocol. Provide up to 5 suggested links. Do not link to sites whose primary goal is to advertise or sell commercial products or services. URL Definition: complete URL, including http:// Example: http://www.alzheimers.org/
degrees	LOCATION_CONTACTS	Degree	Degree Contact information limit: Degrees: 30 characters																																										Degree	changed "Degrees" to "Degree"	Degrees
email	LOCATION_CONTACTS	Email	Email * (FDAAA): (or Phone required) electronic mail address of the facility contact person Contact information limit: Email: 254 characters						• Email * (FDAAA): (or Phone required) electronic mail address of the facility contact person	inserted "* (FDAAA) (or Phone required)"	• Email: electronic mail address of the facility contact person
first_name	LOCATION_CONTACTS	First Name	First Name Contact information limit: First Name: 62 characters																																										First Name	deleted ": given name"	First Name: given name
full_name	LOCATION_CONTACTS	Full Name
last_name	LOCATION_CONTACTS	Last Name	Last Name for Facility Contact and Facility Contact Backup * (FDAAA) Last Name for Investigators (at the protocol location) Contact information limit: Last Name: 62 characters						• Last Name * (FDAAA)	inserted "* (FDAAA)"																																			Last Name	deleted ": family name"	Last Name: family name
location_contact_id	LOCATION_CONTACTS
location_id	LOCATION_CONTACTS
middle_initial	LOCATION_CONTACTS	Middle Initial	Middle Initial
nct_id	LOCATION_CONTACTS	ClinicalTrials.gov registry number	Definition not found
person_type	LOCATION_CONTACTS	Type of Location contact (contact, backup, or investigator)	Facility Contact * (FDAAA) (or Central Contact required) Facility Contact Backup Person to contact if Facility Contact is not available (i.e., a second contact person). Investigators (at the protocol location)						Facility Contact * (FDAAA) (or Central Contact required) Facility Contact Backup Person to contact if Facility Contact is not available (i.e., a second contact person). Investigators (at the protocol location)	under Facility Contact, inserted "* (FDAAA) (or Central Contact required)"	Facility Contact Facility Contact Backup Person to contact if Facility Contact is not available (i.e., a second contact person). Investigators (at the protocol location)	under Facility Contact, deleted "*"																	Facility Contact * Facility Contact Backup Person to contact if Facility Contact is not available (i.e., a second contact person). Investigators (at the protocol location)	under Facility Contact, inserted "*"					Facility Contact Facility Contact Backup Person to contact if Facility Contact is not available (i.e., a second contact person). Investigators (at the protocol location)	under Facility Contact, deleted "Submission: Required (if a Central Contact is not provided)" under Facility Contact Backup, deleted "Submission: Optional" under Investigators (at the protocol location), deleted "Submission: Optional"					Facility Contact Submission: Required (if a Central Contact is not provided) Facility Contact Backup Submission: Optional Person to contact if Facility Contact is not available (i.e., a second contact person). Investigators (at the protocol location) Submission: Optional	under Facility Contact, inserted "Submission: Required (if a Central Contact is not provided)" under Facility Contact Backup, changed "(if desired)" to "Submission: Optional" under Investigators (at the protocol location), inserted "Submission: Optional"			Facility Contact Facility Contact Backup (if desired) Person to contact if Facility Contact is not available (i.e., a second contact person). Investigators (at the protocol location)	under Facility Contact Backup (if desired), inserted "(i.e., a second contact person)" under Investigators (at the protocol location), deleted "Information for FDA/Industry Pilot - will not be published: Date of Birth Qualifications: free text summarizing the investigator's most significant education, training, and experience"	Facility Contact Facility Contact Backup (if desired) Person to contact if Facility Contact is not available. Investigators (at the protocol location) o Information for FDA/Industry Pilot - will not be published:  Date of Birth  Qualifications: free text summarizing the investigator's most significant education, training, and experience
phone	LOCATION_CONTACTS	Phone	Phone * (FDAAA): (or Email required) office phone of the facility contact person. Use the format 123-456-7890 within the United States and Canada. Otherwise, provide the country code. Contact information limit: Phone: 30 characters						• Phone * (FDAAA) (or Email required): office phone of the facility contact person. Use the format 123-456-7890 within the United States and Canada. Otherwise, provide the country code.	inserted "* (FDAAA) (or Email required)"	• Phone: office phone of the facility contact person. Use the format 123-456-7890 within the United States and Canada. Otherwise, provide the country code.
phone_ext	LOCATION_CONTACTS	Phone extension	Ext: phone extension, if needed Contact information limit: Phone Ext: 14 characters
role	LOCATION_CONTACTS	Location Official's Role (Principal Investigator or Sub Investigator)	Role: Site Principal Investigator or Site Sub-Investigator (pick one)																												Site Principal Investigator or Site Sub-Investigator (pick one)	changed from "Principal Investigator or Sub-Investigator (pick one)" to "Site Principal Investigator or Site Sub-Investigator (pick one)"	Principal Investigator or Sub-Investigator (pick one)
location_id	LOCATIONS
nct_id	LOCATIONS	ClinicalTrials.gov registry number	Definition not found
status	LOCATIONS	Recruitment Status	Recruitment Status * FDAAA - protocol accrual activity at a facility. Select one. Not yet recruiting: participants are not yet being recruited Recruiting: participants are currently being recruited Enrolling by invitation: participants are being (or will be) selected from a predetermined population Active, not recruiting: study is ongoing (i.e., patients are being treated or examined), but partic…						Recruitment Status * FDAAA - protocol accrual activity at a facility. Select one. • Not yet recruiting: participants are not yet being recruited • Recruiting: participants are currently being recruited • Enrolling by invitation: participants are being (or will be) selected from a predetermined population • Active, not recruiting: study is ongoing (i.e., patients are being treated or examined), bu…	inserted "* FDAAA"	Recruitment Status - protocol accrual activity at a facility. Select one. Not yet recruiting: participants are not yet being recruited Recruiting: participants are currently being recruited Enrolling by invitation: participants are being (or will be) selected from a predetermined population Active, not recruiting: study is ongoing (i.e., patients are being treated or examined), but participants a…	deleted "*"	Recruitment Status * - protocol accrual activity at a facility. Select one. Not yet recruiting: participants are not yet being recruited Recruiting: participants are currently being recruited Enrolling by invitation: participants are being (or will be) selected from a predetermined population Active, not recruiting: study is ongoing (i.e., patients are being treated or examined), but participants…	under Not Yet Recruiting, changed "participants are not yet being recruited or enrolled" to "participants are not yet being recruited" under Recruiting, changed "participants are currently being recruited and enrolled" to "participants are currently being recruited" deleted "• No longer recruiting: participants are no longer being recruited or enrolled" inserted "• Enrolling by invitation: partic…					Recruitment Status * - protocol accrual activity at a facility. Select one. Not yet recruiting: participants are not yet being recruited or enrolled Recruiting: participants are currently being recruited and enrolled No longer recruiting: participants are no longer being recruited or enrolled Completed: the study has concluded normally; participants are no longer being examined or treated (i.e., …	changed "• Completed: participants are no longer being recruited; data analysis is complete • Suspended: recruiting or enrolling participants has halted but potentially will resume • Terminated: recruiting or enrolling participants has halted and will not resume; participents are no longer being examined or treated • Withdrawn: recruitment terminated prior to enrollment of first participant" to "…	Recruitment Status * - protocol accrual activity at a facility. Select one. • Not yet recruiting: participants are not yet being recruited or enrolled • Recruiting: participants are currently being recruited and enrolled • No longer recruiting: participants are no longer being recruited or enrolled • Completed: participants are no longer being recruited; data analysis is complete • Suspended: rec…	under Terminated, inserted "; participents are no longer being examined or treated"					Recruitment Status * - protocol accrual activity at a facility. Select one. Not yet recruiting: participants are not yet being recruited or enrolled Recruiting: participants are currently being recruited and enrolled No longer recruiting: participants are no longer being recruited or enrolled Completed: participants are no longer being recruited; data analysis is complete Suspended: recruiting or…	inserted "Withdrawn: recruitment terminated prior to enrollment of first participant"	Recruitment Status * - protocol accrual activity at a facility. Select one. • Not yet recruiting: participants are not yet being recruited or enrolled • Recruiting: participants are currently being recruited and enrolled • No longer recruiting: participants are no longer being recruited or enrolled • Completed: participants are no longer being recruited; data analysis is complete • Suspended: rec…	inserted " * " inserted "Tip: When a trial's overall status changes to 'No longer recruiting,' it is not necessary to change recruitment status for each location. Location recruitment status is only shown on ClinicalTrials.gov when Overall Status is 'Recruiting'."					Recruitment Status: protocol accrual activity at a facility. Select one. Not yet recruiting: participants are not yet being recruited or enrolled Recruiting: participants are currently being recruited and enrolled No longer recruiting: participants are no longer being recruited or enrolled Completed: participants are no longer being recruited; data analysis is complete Suspended: recruiting or en…	deleted "Submission: Required (if Overall Status is "Recruiting")"					Recruitment Status: protocol accrual activity at a facility. Select one. Submission: Required (if Overall Status is "Recruiting") • Not yet recruiting: participants are not yet being recruited or enrolled • Recruiting: participants are currently being recruited and enrolled • No longer recruiting: participants are no longer being recruited or enrolled • Completed: participants are no longer being…	inserted "Submission: Required (if Overall Status is "Recruiting")" changed "the protocol is not yet recruiting and enrolling participants" to "participants are not yet being recruited or enrolled" changed "the protocol is actively recruiting and enrolling participants" to "participants are currently being recruited and enrolled" changed "the protocol is not recruiting or enrolling participants" …			Recruitment Status: protocol accrual activity at a facility. Select one. Not yet recruiting: the protocol is not yet recruiting and enrolling participants Recruiting: the protocol is actively recruiting and enrolling participants No longer recruiting: the protocol is not recruiting or enrolling participants Completed: the protocol is no longer recruiting. Data analysis is complete. Suspended: rec…	changed "subjects" to "participants" - multiple times	Recruitment Status: protocol accrual activity at a facility. Select one. Not yet recruiting: the protocol is not yet recruiting and enrolling subjects Recruiting: the protocol is actively recruiting and enrolling subjects No longer recruiting: the protocol is not recruiting or enrolling subjects Completed: the protocol is no longer recruiting. Data analysis is complete. Suspended: recruiting or e…
mesh_id	MESH_TREES	MeSH ID for corresponding MeSH term
mesh_term	MESH_TREES	MeSH term(s) given in a study
mesh_tree_id	MESH_TREES
mesh_type	MESH_TREES	Interventional or Conditional MeSH term
nct_id	MESH_TREES	ClinicalTrials.gov registry number
node_name	MESH_TREES	Node Name
node_value	MESH_TREES	Node Value
mesh_id	MESH_TREES_RAW	MeSH ID associated with a MeSH term
mesh_term	MESH_TREES_RAW	Condition or Intervention MeSH term
description	OUTCOMES	Description	Description - Additional information about the outcome measure, if needed for clarification. (Limit: 600 characters)	inserted "(Limit: 600 characters)"	Description - Additional information about the outcome measure, if needed for clarification.	inserted new item "Description - Additional information about the outcome measure, if needed for clarification."
measure	OUTCOMES	Outcome Measure	Title * - A concise name for the specific measure that will be used to determine the effect of the intervention(s) or, for observational studies, related to core objectives of the study and receiving the most emphasis in assessment. (Limit: 254 characters) Examples: Title: all cause mortality Title: Evidence of clinically definite ischemic stroke (focal neurological deficits persisting for more t…	inserted "(Limit: 254 characters)"	Title * - A concise name for the specific measure that will be used to determine the effect of the intervention(s) or, for observational studies, related to core objectives of the study and receiving the most emphasis in assessment. Examples: Title: all cause mortality Title: Evidence of clinically definite ischemic stroke (focal neurological deficits persisting for more than 24 hours) confirmed …	changed "Outcome Measure" to "Title" deleted "FDAAA" inserted "*" changed "The specific measure" to "A concise name for the specific measure" under Examples, changed "Outcome Measure" to "Title" - twice			Outcome Measure FDAAA - The specific measure that will be used to determine the effect of the intervention(s) or, for observational studies, related to core objectives of the study and receiving the most emphasis in assessment. Examples: Outcome Measure: all cause mortality Outcome Measure: Evidence of clinically definite ischemic stroke (focal neurological deficits persisting for more than 24 ho…	inserted "FDAAA"	Outcome Measure - The specific measure that will be used to determine the effect of the intervention(s) or, for observational studies, related to core objectives of the study and receiving the most emphasis in assessment. Example: Outcome Measure: all cause mortality Outcome Measure: Evidence of clinically definite ischemic stroke (focal neurological deficits persisting for more than 24 hours) co…	deleted "WHO" changed " Primary Outcome Measures Definition: The specific measure that will be used to determine the effect of the intervention(s) or, for observational studies, related to core objectives of the study and receiving the most emphasis in assessment. Include the time frame for taking measurements. Examples: Measure: all cause mortality Measure: Evidence of clinically definite ischem…	Outcome Measures WHO Definition: Specific measurements or observations used to measure the effect of experimental variables in a study, or for observational studies, to describe patterns of diseases or traits or associations with exposures, risk factors or treatment. Primary Outcome Measures Definition: The specific measure that will be used to determine the effect of the intervention(s) or, for …	under Outcome Measures definition, inserted ", or for observational studies, to describe patterns of diseases or traits or associations with exposures, risk factors or treatment." changed Primary Outcome Measures definition from "The specific measure that will be used to determine the effect of the intervention(s), along with the time frame for taking measurements. " to "The specific measure that…							Outcome Measures WHO Definition: Specific measurements or observations used to measure the effect of experimental variables in a study. Primary Outcome Measures Definition: The specific measure that will be used to determine the effect of the intervention(s), along with the time frame for taking measurements. Examples: Measure: all cause mortality Time Frame: one year Measure: Evidence of clinica…	changed Primary Outcome Measures Definition from "The specific measure that will be used to determine the effect of the intervention(s). The description should include the time at which the measure will be taken." to "The specific measure that will be used to determine the effect of the intervention(s), along with the time frame for taking measurements." changed Primary Outcome Examples from "all…							Outcome Measures WHO Definition: Specific measurements or observations used to measure the effect of experimental variables in a study. Primary Outcome Measures Definition: The specific measure that will be used to determine the effect of the intervention(s). The description should include the time at which the measure will be taken. Examples: all cause mortality at one year; score on a depressio…	changed "Outcomes" to "Outcome Measures WHO" changed "Primary Outcomes" to "Primary Outcome Measures" changed "Secondary Outcomes" to "Secondary Outcome Measures"
nct_id	OUTCOMES	ClinicalTrials.gov registry number
outcome_id	OUTCOMES
safety_issue	OUTCOMES	Safety Issue?	Safety Issue? (FDAAA) - Is this outcome measure assessing a safety issue? Select: Yes/No [Examples:] Safety Issue: No Safety Issue: Yes						Safety Issue? (FDAAA) - Is this outcome measure assessing a safety issue? Select: Yes/No Examples: Safety Issue: No Safety Issue: Yes	inserted "(FDAAA)"	Safety Issue? - Is this outcome measure assessing a safety issue? Select: Yes/No Examples Safety Issue: No Safety Issue: Yes	inserted new item "Safety Issue? - Is this outcome measure assessing a safety issue? Select: Yes/No Examples Safety Issue: No Safety Issue: Yes"
time_frame	OUTCOMES	Time Frame	Time Frame (FDAAA) - Time point(s) at which outcome measure is assessed. (Limit: 254 characters) [Examples:] Time Frame: one year Time Frame: within the first 30 days (plus or minus 3 days) after surgery	inserted "(Limit: 254 characters)"					Time Frame (FDAAA) - Time point(s) at which outcome measure is assessed. Examples: Time Frame: one year Time Frame: within the first 30 days (plus or minus 3 days) after surgery	inserted "(FDAAA)"	Time Frame - Time point(s) at which outcome measure is assessed. Examples: Time Frame: one year Time Frame: within the first 30 days (plus or minus 3 days) after surgery	inserted new item "Time Frame - Time point(s) at which outcome measure is assessed. Examples: Time Frame: one year Time Frame: within the first 30 days (plus or minus 3 days) after surgery "
type	OUTCOMES	Primary or Secondary Outcome	Primary and Secondary Outcome Measures NOTE: When Results are added to a record, outcome measures are transferred from the protocol section to the results section. Primary Outcome Measure FDAAA Definition: Specific key measurement(s) or observation(s) used to measure the effect of experimental variables in a study, or for observational studies, to describe patterns of diseases or traits or associ…		Primary and Secondary Outcome Measures NOTE: When Results are added to a record, outcome measures are transferred from the protocol section to the results section. Primary Outcome Measure FDAAA Definition: Specific key measurement(s) or observation(s) used to measure the effect of experimental variables in a study, or for observational studies, to describe patterns of diseases or traits or associ…	under Secondary Outcome Measures, changed "Specify Outcome Measure, Time Frame and Safety Issue (see above)." to "Specify Title, Time Frame, Description (if needed) and Safety Issue as described above."	Primary and Secondary Outcome Measures NOTE: When Results are added to a record, outcome measures are transferred from the protocol section to the results section. Primary Outcome Measure FDAAA Definition: Specific key measurement(s) or observation(s) used to measure the effect of experimental variables in a study, or for observational studies, to describe patterns of diseases or traits or associ…	under Primary and Secondary Outcome Measures, inserted "NOTE: When Results are added to a record, outcome measures are transferred from the protocol section to the results section."	Primary and Secondary Outcome Measures Primary Outcome Measure FDAAA Definition: Specific key measurement(s) or observation(s) used to measure the effect of experimental variables in a study, or for observational studies, to describe patterns of diseases or traits or associations with exposures, risk factors or treatment. Secondary Outcome Measures FDAAA Definition: Other key measures that will b…	under Primary Outcome Measure, inserted "FDAAA" under Secondary Outcome Measure, inserted "FDAAA"	Primary and Secondary Outcome Measures Primary Outcome Measure Definition: Specific key measurement(s) or observation(s) used to measure the effect of experimental variables in a study, or for observational studies, to describe patterns of diseases or traits or associations with exposures, risk factors or treatment. Secondary Outcome Measures Definition: Other key measures that will be used to ev…	Deleted "WHO" changed "Outcome Measures WHO Definition: Specific measurements or observations used to measure the effect of experimental variables in a study, or for observational studies, to describe patterns of diseases or traits or associations with exposures, risk factors or treatment. Secondary Outcome Measures Definition: Other key measures that will be used to evaluate the intervention(s) …																	Outcome Measures WHO Definition: Specific measurements or observations used to measure the effect of experimental variables in a study. # Primary Outcome Measures Definition: The specific measure that will be used to determine the effect of the intervention(s). The description should include the time at which the measure will be taken. Examples: all cause mortality at one year; score on a depress…	inserted "WHO"	Outcomes: Definition: Specific measurements or observations used to measure the effect of experimental variables in a study. Primary Outcomes: Definition: The specific measure that will be used to determine the effect of the intervention(s). The description should include the time at which the measure will be taken. Examples: all cause mortality at one year; score on a depression rating scale at …	changed Primary Outcomes from "Definition: Main outcome(s) representing a primary study question(s). Examples: congestive heart failure; fatal stroke; cognitive function" to "Definition: The specific measure that will be used to determine the effect of the intervention(s). The description should include the time at which the measure will be taken. Examples: all cause mortality at one year; score …			Outcomes: Definition: Specific measurements or observations used to measure the effect of experimental variables in a study. Primary Outcomes: Definition: Main outcome(s) representing a primary study question(s). Examples: congestive heart failure; fatal stroke; cognitive function Secondary Outcomes: Definition: Outcome(s) of interest to a study, but not representing the primary study question(s)…	inserted new item "Outcomes: Definition: Specific measurements or observations used to measure the effect of experimental variables in a study. Primary Outcomes: Definition: Main outcome(s) representing a primary study question(s). Examples: congestive heart failure; fatal stroke; cognitive function Secondary Outcomes: Definition: Outcome(s) of interest to a study, but not representing the primar…
affiliation	PERSONS	Organizational Affiliation	Organizational Affiliation: Full name of the official's organization. If none, specify Unaffiliated. (Limit: 255 characters)	inserted "(Limit: 255 characters)"																											Organizational Affiliation: Full name of the official's organization. If none, specify Unaffiliated.	inserted "If none, specify Unaffiliated."	Organizational Affiliation: Full name of the official's organization.
degrees	PERSONS	Degree	Degree Contact information limit: Degrees: 30 characters	inserted "Contact information limit": "30 characters"																																									Degree	changed "Degrees" to "Degree"	Degrees
email	PERSONS	Email	Email * (FDAAA): electronic mail address of the central contact person Contact information limit: Email: 254 characters	inserted "Contact information limit": "254 characters"					• Email * (FDAAA): electronic mail address of the central contact person	inserted "* (FDAAA)"
first_name	PERSONS	First Name	First Name: 62 characters Contact information limit: First Name: 62 characters	inserted "Contact information limit": "62 characters"																																									First Name	deleted "given name"	First Name: given name
full_name	PERSONS
last_name	PERSONS	Last Name	Last Name for Central Contact and Central Contact Backup * (FDAAA) Last Name for Overall Study Officials Contact information limit: Last Name: 62 characters	inserted "Contact information limit": "62 characters"					Last Name for Central Contact and Central Contact Backup * (FDAAA) Last Name for Overall Study Officials	under Last Name for Central Contact and Central Contact Backup, inserted "* (FDAAA)"																																			Last Name	deleted "family name"	Last Name: family name
middle_initial	PERSONS	Middle Initial	Middle Initial
name_title	PERSONS	name and title of responsible party	Name/Official Title FDAAA - for either the principal investigator or sponsor contact (Limit: 254 characters)	inserted "(Limit: 254 characters)"					Name/Official Title FDAAA - for either the principal investigator or sponsor contact	inserted "FDAAA"	Provide the following information for the designated responsible party: o Name/Official Title - for either the principal investigator or sponsor contact	inserted new item "Provide the following information for the designated responsible party: o Name/Official Title - for either the principal investigator or sponsor contact"
nct_id	PERSONS	ClinicalTrials.gov registry number
organization	PERSONS	organization of responsible party	Organization FDAAA - the sponsor or the principal investigator's organizational affiliation (Limit: 254 characters) Contact Information FDAAA - [required for internal administrative use only; not revealed to public] provide telephone number and/or email address	under Organization, inserted "(Limit: 254 characters)"					Organization FDAAA - the sponsor or the principal investigator's organizational affiliation Contact Information FDAAA - [required for internal administrative use only; not revealed to public] provide telephone number and/or email address	under Organization, inserted "FDAAA" under Contact Information, inserted "FDAAA" under Contact Information, changed "for internal administrative use" to "required for internal administrative use"	o Organization - the sponsor or the principal investigator's organizational affiliation o Contact Information - [for internal administrative use only; not revealed to public] provide telephone number and/or email address	inserted new item "o Organization - the sponsor or the principal investigator's organizational affiliation o Contact Information - [for internal administrative use only; not revealed to public] provide telephone number and/or email address"
person_id	PERSONS
person_type	PERSONS	Type of Overall official (Overall Study Officials, Central Contact, Central contact backup, Responsible party)	Overall Study Officials: Person(s) responsible for the overall scientific leadership of the protocol, including study principal investigator._x000D_ _x000D_ Central Contact or Overall Contact (or Facility Contact required): Person providing centralized, coordinated recruitment information for the entire study. * (FDAAA) _x000D_ _x000D_ Central Contact Backup: Person to contact if Central Contact …						Central Contact * (FDAAA) (or Facility Contact required) Definition: Person providing centralized, coordinated recruitment information for the entire study. Central Contact Backup Person to contact if Central Contact is not available. Overall Study Officials Definition: Person(s) responsible for the overall scientific leadership of the protocol, including study principal investigator. Responsible…	under Central Contact, inserted "* (FDAAA) (or Facility Contact required)" under Responsible Party, inserted "FDAAA"	Central Contact Definition: Person providing centralized, coordinated recruitment information for the entire study. Central Contact Backup Person to contact if Central Contact is not available. Overall Study Officials Definition: Person(s) responsible for the overall scientific leadership of the protocol, including study principal investigator. Responsible Party Definition: As defined in US Publi…	under Central Contact, deleted " * " under Overall Study Officials, deleted " * " under Overall Study Officials, deleted "Study official information is not required for trials associated with U.S. FDA Investigational New Drug (IND) or Investigational Device Exemption (IDE) applications." inserted "Responsible Party Definition: As defined in US Public Law 110-85, Title VIII, Section 801, the term …																	Central Contact * Definition: Person providing centralized, coordinated recruitment information for the entire study. Central Contact Backup Person to contact if Central Contact is not available. Overall Study Officials * Study official information is not required for trials associated with U.S. FDA Investigational New Drug (IND) or Investigational Device Exemption (IDE) applications. Definition:…	under Central Contact and Overall Study Officials, inserted "*"	Central Contact Definition: Person providing centralized, coordinated recruitment information for the entire study. Central Contact Backup Person to contact if Central Contact is not available. Overall Study Officials Study official information is not required for trials associated with U.S. FDA Investigational New Drug (IND) or Investigational Device Exemption (IDE) applications. Definition: Per…	under Overall Study Officials, inserted "Study official information is not required for trials associated with U.S. FDA Investigational New Drug (IND) or Investigational Device Exemption (IDE) applications." changed "principal investigator" to "study principal investigator"	Central Contact Definition: Person providing centralized, coordinated recruitment information for the entire study. Central Contact Backup Person to contact if Central Contact is not available. Overall Study Officials Definition: Person(s) responsible for the overall scientific leadership of the protocol including principal investigator.	under Overall Study Officials, inserted "including principal investigator"	Central Contact Definition: Person providing centralized, coordinated recruitment information for the entire study. Central Contact Backup Person to contact if Central Contact is not available. Overall Study Officials Definition: Person(s) responsible for the overall scientific leadership of the protocol.	under Central Contact, deleted "Submission: Required (if a Facility Contact is not provided)" under Central Contact Backup deleted "Submission: Optional" under Overall Study Officials, deleted "Submission: Optional"					Central Contact Submission: Required (if a Facility Contact is not provided) Definition: Person providing centralized, coordinated recruitment information for the entire study. Central Contact Backup Submission: Optional Person to contact if Central Contact is not available. Overall Study Officials Submission: Optional Definition: Person(s) responsible for the overall scientific leadership of the…	under Central Contact, changed "(if desired)" to "Submission: Required (if a Facility Contact is not provided)" under Central Contact Backup, changed "(if desired)" to "Submission: Optional" Under Overall Study Officials, changed "(if desired)" to "Submission: Optional"	Central Contact (if desired) Definition: Person providing centralized, coordinated recruitment information for the entire study. Central Contact Backup (if desired) Person to contact if Central Contact is not available. Overall Study Officials (if desired) Definition: Person(s) responsible for the overall scientific leadership of the protocol.
phone	PERSONS	Phone	Phone * (FDAAA): Toll free phone number of the central contact. person. Use the format 800-555-5555 within the United States and Canada. Otherwise, provide the country code. Contact information limit: Phone: 30 characters	inserted "Contact information limit: 30 characters"					• Phone * (FDAAA): Toll free phone number of the central contact. person. Use the format 800-555-5555 within the United States and Canada. Otherwise, provide the country code.	inserted "* (FDAAA)"	Phone: Toll free phone number of the central contact. person. Use the format 800-555-5555 within the United States and Canada. Otherwise, provide the country code.	changed "Office phone of" to "Toll free phone number of" changed "123-456-7890" to "800-555-5555"	Phone: Office phone of the central contact person. Use the format 123-456-7890 within the United States and Canada. Otherwise, provide the country code.
phone_ext	PERSONS	Phone extension	Ext: phone extension, if needed Contact information limit: Phone Ext: 14 characters	inserted "Contact information limit: 14 characters"	Ext: phone extension, if needed
role	PERSONS	Overall Official's Role (Study Chair, Study Director)	Official's Role: Position or function of the official. Select one (Study Chair/Study Director/Study Principal Investigator).																												Official's Role: Position or function of the official. Select one (Study Chair/Study Director/Study Principal Investigator).	changed "principal investigator" to "study principal investigator"	Official's Role: Position or function of the official. Select one (Study Chair/Study Director/Principal Investigator).
citation	REFERENCES	Citation	References Definition: Citations to publications related to the protocol: background and/or results. Provide either the unique PubMed Identifier (PMID) of an article or enter the full bibliographic citation. Citation Definition: bibliographic reference in NLM's MEDLINE format (Limit: 2000 characters) Example: Barza M; Pavan PR; Doft BH; Wisniewski SR; Wilson LA; Han DP; Kelsey SF. Evaluation of m…	inserted "(Limit: 2000 characters)"																															References Definition: Citations to publications related to the protocol: background and/or results. Provide either the unique PubMed Identifier (PMID) of an article or enter the full bibliographic citation. Citation Definition: bibliographic reference in NLM's MEDLINE format Example: Barza M; Pavan PR; Doft BH; Wisniewski SR; Wilson LA; Han DP; Kelsey SF. Evaluation of microbiological diagnostic…	under References, deleted "Submission: Optional" under Citation, deleted "Submission: Optional"					References Submission: Optional Definition: Citations to publications related to the protocol: background and/or results. Provide either the unique PubMed Identifier (PMID) of an article or enter the full bibliographic citation. Citation Submission: Optional Definition: bibliographic reference in NLM's MEDLINE format Example: Barza M; Pavan PR; Doft BH; Wisniewski SR; Wilson LA; Han DP; Kelsey SF…	under References, inserted "Submission: Optional" under Citation, inserted "Submission: Optional"	References Definition: Citations to publications related to the protocol: background and/or results. Provide either the unique PubMed Identifier (PMID) of an article or enter the full bibliographic citation. Citation Definition: bibliographic reference in NLM's MEDLINE format Example: Barza M; Pavan PR; Doft BH; Wisniewski SR; Wilson LA; Han DP; Kelsey SF: Evaluation of microbiological diagnostic…
nct_id	REFERENCES	ClinicalTrials.gov registry number
PMID	REFERENCES	MEDLINE Identifier	MEDLINE Identifier Definition: unique PubMed Identifier (PMID) for the citation in MEDLINE Example: PMID: 10987815																																MEDLINE Identifier Definition: unique PubMed Identifier (PMID) for the citation in MEDLINE Example: PMID: 10987815	deleted "Submission: Optional"					MEDLINE Identifier Submission: Optional Definition: unique PubMed Identifier (PMID) for the citation in MEDLINE Example: PMID: 10987815	changed "MEDLINE PMID" to "MEDLINE Identifier" inserted "Submission: Optional" under Definition, changed "the citation" to "the citation in MEDLINE"	MEDLINE PMID Definition: unique PubMed Identifier (PMID) for the citation Example: PMID: 10987815
reference_id	REFERENCES																																												11. Related Information References Definition: Citations to publications related to the protocol: background and/or results. Provide either the unique PubMed Identifier (PMID) of an article or enter the full bibliographic citation.	changed "Provide up to 5 full citations" to "Provide either the unique PubMed Identifier (PMID) of an article or enter the full bibliographic citation"	11. Related Information References Definition: Citations to publications related to the protocol: background and/or results. Provide up to 5 full citations.
reference_type	REFERENCES	Reference or Results Reference	Reference: Citations to publications related to the protocol: background and/or results. Provide either the unique PubMed Identifier (PMID) of an article or enter the full bibliographic citation. _x000D_ _x000D_ Results Reference: Indicate if the reference provided reports on results from this clinical research study.																														Results Reference? Definition: Indicate if the reference provided reports on results from this clinical research study.	inserted new item "Results Reference? Definition: Indicate if the reference provided reports on results from this clinical research study."
nct_id	SECONDARY_IDS	ClinicalTrials.gov registry number
sec_id	SECONDARY_IDS
secondary_id	SECONDARY_IDS	Secondary ids	Secondary IDs FDAAA Definition: Other identification numbers assigned to the protocol, including unique identifiers from other registries and NIH grant numbers, if applicable. (Limit: 30 characters) ID Type Select one. Provide additional information, depending upon selected ID Type, as noted below. (Limit: 119 characters) • US NIH Grant Number - in the Secondary ID field, include activity code, i…	under Secondary IDs, inserted "(Limit: 30 characters)" under ID Type, inserted "(Limit: 119 characters)"	Secondary IDs FDAAA Definition: Other identification numbers assigned to the protocol, including unique identifiers from other registries and NIH grant numbers, if applicable. ID Type Select one. Provide additional information, depending upon selected ID Type, as noted below. • US NIH Grant Number - in the Secondary ID field, include activity code, institute code and 6-digit serial number. Other …	changed "Provide up to 5 Secondary ID Numbers, one per line. Examples: ISRCTN12345678 NCI-793-0115D R01-123456-1 " to "ID Type Select one. Provide additional information, depending upon selected ID Type, as noted below. • US NIH Grant Number - in the Secondary ID field, include activity code, institute code and 6-digit serial number. Other components of the full grant number (type code, support y…			Secondary IDs FDAAA Definition: Other identification numbers assigned to the protocol, including unique identifiers from other registries and NIH grant numbers, if applicable. Provide up to 5 Secondary ID Numbers, one per line. Examples: ISRCTN12345678 NCI-793-0115D R01-123456-1	inserted "FDAAA"	Secondary IDs Definition: Other identification numbers assigned to the protocol, including unique identifiers from other registries and NIH grant numbers, if applicable. Provide up to 5 Secondary ID Numbers, one per line. Examples: ISRCTN12345678 NCI-793-0115D R01-123456-1	deleted "WHO" changed "including ISRCTN (see http://isrctn.org)" to "including unique identifiers from other registries" inserted "R01-123456-1"															Secondary IDs WHO Definition: Other identification numbers assigned to the protocol, including ISRCTN (see http://isrctn.org) and NIH grant numbers, if applicable. Provide up to 5 Secondary ID Numbers, one per line. Examples: ISRCTN12345678 NCI-793-0115D	changed "any applicable NIH grant numbers" to "including ISRCTN (see http://isrctn.org) and NIH grant numbers, if applicable" changed "Provide up to 5 Secondary ID numbers" to "Provide up to 5 Secondary ID numbers, one per line" inserted one Example, "ISRCTN12345678"	Secondary IDs WHO Definition: Other identification numbers assigned to the protocol, including any applicable NIH grant numbers. Provide up to 5 Secondary ID Numbers. Example: NCI-793-0115D	inserted "WHO"					Secondary IDs Definition: Other identification numbers assigned to the protocol, including any applicable NIH grant numbers. Provide up to 5 Secondary ID Numbers. Example: NCI-793-0115D	deleted "Submission: Optional"					Secondary IDs Submission: Optional Definition: Other identification numbers assigned to the protocol, including any applicable NIH grant numbers. Provide up to 5 Secondary ID Numbers. Example: NCI-793-0115D	inserted "Submission: Optional"	Secondary IDs Definition: Other identification numbers assigned to the protocol, including any applicable NIH grant numbers. Provide up to 5 Secondary ID Numbers. Example: NCI-793-0115D
agency	SPONSORS	Sponsor Name	value of sponsor/collaborator
agency_class	SPONSORS	Agency Class	Definition not found
nct_id	SPONSORS	ClinicalTrials.gov registry number
sponsor_id	SPONSORS
sponsor_type	SPONSORS	Lead Sponsor or Collaborators	Sponsor * FDAAA Definition: Name of primary organization that oversees implementation of study and is responsible for data analysis. For applicable clinical trials, sponsor is defined in 21 CFR 50.3. (Limit: 160 characters) Examples: National Institute of Allergy and Infectious Diseases, Bristol-Myers Squibb Collaborators Definition: Other organizations (if any) providing support, including fundi…	inserted "(Limit 160 characters)"					Sponsor * FDAAA Definition: Name of primary organization that oversees implementation of study and is responsible for data analysis. For applicable clinical trials, sponsor is defined in 21 CFR 50.3. Examples: National Institute of Allergy and Infectious Diseases, Bristol-Myers Squibb Collaborators Definition: Other organizations (if any) providing support, including funding, design, implementati…	under Sponsor, inserted "* FDAAA"	Sponsor Definition: Name of primary organization that oversees implementation of study and is responsible for data analysis. For applicable clinical trials, sponsor is defined in 21 CFR 50.3. Examples: National Institute of Allergy and Infectious Diseases, Bristol-Myers Squibb Collaborators Definition: Other organizations (if any) providing support, including funding, design, implementation, data…	under Sponsor, deleted "*" under Sponsor, inserted "For applicable clinical trials, sponsor is defined in 21 CFR 50.3." under Collaborators, deleted "WHO" under Collaborators, changed "Other organizations providing support" to "Other organizations (if any) providing support"									Sponsor * Definition: Name of primary organization that oversees implementation of study and is responsible for data analysis. Examples: National Institute of Allergy and Infectious Diseases, Bristol-Myers Squibb Collaborators WHO Definition: Other organizations providing support, including funding, design, implementation, data analysis and reporting. The data provider is responsible for confirmi…	under Sponsor, changed "Name of sponsoring organization that takes responsibility for and initiates a clinical investigation" to "Name of primary organization that oversees implementation of study and is responsible for data analysis." under Collaborators, changed "Full names of all organizations co-sponsoring and/or providing financial support for the protocol" to "Other organizations providing …							Sponsor * Definition: Name of sponsoring organization that takes responsibility for and initiates a clinical investigation. Examples: National Institute of Allergy and Infectious Diseases, Bristol-Myers Squibb Collaborators WHO Definition: Full names of all organizations co-sponsoring and/or providing financial support for the protocol. The data provider is responsible for confirming all collabor…	under Sponsor, inserted "*" under Collaborators, inserted "WHO"			Sponsor Definition: Name of sponsoring organization that takes responsibility for and initiates a clinical investigation. Examples: National Institute of Allergy and Infectious Diseases, Bristol-Myers Squibb Collaborators Definition: Full names of all organizations co-sponsoring and/or providing financial support for the protocol. The data provider is responsible for confirming all collaborators …	reversed the order of the two Sponsor Examples	Sponsor Definition: Name of sponsoring organization that takes responsibility for and initiates a clinical investigation. Examples: Bristol-Myers Squibb; National Institute of Allergy and Infectious Diseases Collaborators Definition: Full names of organizations co-sponsoring and/or providing financial support for the protocol. The data provider is responsible for confirming all collaborators befo…	under Sponsor, deleted "Submission: Required" under Collaborators, deleted "Submission: Optional"	Sponsor Submission: Required Definition: Name of sponsoring organization that takes responsibility for and initiates a clinical investigation. Examples: Bristol-Myers Squibb; National Institute of Allergy and Infectious Diseases Collaborators Submission: Optional Definition: Full names of organizations co-sponsoring and/or providing financial support for the protocol. The data provider is respons…	under Collaborators, inserted "The data provider is responsible for confirming all collaborators before listing them." changed "organization" to "organizations"			Sponsor Submission: Required Definition: Name of sponsoring organization that takes responsibility for and initiates a clinical investigation. Examples: Bristol-Myers Squibb; National Institute of Allergy and Infectious Diseases Collaborators Submission: Optional Definition: Full names of organizations co-sponsoring and/or providing financial support for the protocol. Provide up to 10 full names …	under Sponsor, inserted "Submission: Required" changed "who" to "that" changed "Example" to "Examples" inserted additional example: "National Institute of Allergy and Infectious Diseases " under Collaborators, inserted "Submission: Optional"			Sponsor Definition: Name of sponsoring organization who takes responsibility for and initiates a clinical investigation. Example: Bristol-Myers Squibb Collaborators Definition: Full names of organizations co-sponsoring and/or providing financial support for the protocol. Provide up to 10 full names of collaborating organization.	deleted " or IND Holder" deleted "OR name of IND holder who takes responsibility for and initiates a clinical investigation."	Sponsor or IND Holder Definition: Name of sponsoring organization who takes responsibility for and initiates a clinical investigation OR name of IND holder who takes responsibility for and initiates a clinical investigation. Example: Bristol-Myers Squibb Collaborators Definition: Full names of organizations co-sponsoring and/or providing financial support for the protocol. Provide up to 10 full n…
		HEADER	Header of the NLM definitions document that indicates overall changes in requirements (*, FDAAA, (FDAAA), WHO) over the period of time				ClinicalTrials.gov Protocol Data Element Definitions (DRAFT) * Required by ClinicalTrials.gov FDAAA Required to comply with US Public Law 110-85, Section 801 (FDAAA) May be required to comply with US Public Law 110-85, Section 801	inserted "Protocol"	ClinicalTrials.gov Data Element Definitions (DRAFT) * Required by ClinicalTrials.gov FDAAA Required to comply with US Public Law 110-85, Section 801 (FDAAA) May be required to comply with US Public Law 110-85, Section 801	inserted " * Required by ClinicalTrials.gov FDAAA Required to comply with US Public Law 110-85, Section 801 (FDAAA) May be required to comply with US Public Law 110-85, Section 801"	ClinicalTrials.gov Data Element Definitions (DRAFT)	changed "Data Element Definitions" to "ClinicalTrials.gov Data Element Definitions (DRAFT)" deleted " * Required by ClinicalTrials.gov. WHO Additionally required by WHO/ICMJE. "																	Data Element Definitions * Required by ClinicalTrials.gov. WHO Additionally required by WHO/ICMJE.	inserted "* Required by ClinicalTrials.gov. WHO Additionally required by WHO/ICMJE."															Data Element Definitions	deleted "for ClinicalTrials.gov"	Data Element Definitions for ClinicalTrials.gov
irb_approved	NONE	Old Item: IRB Approved?	Old Item: IRB Approved?																																								["IRB APPROVED?" item deleted]	deleted entire item	IRB Approved? Definition: Indicate if the protocol has received Institutional Review Board (IRB) approval. Select Yes/No.	changed "obtained IRB approval" to "received Institutional Review Board (IRB) approval" changed "Select one (Yes/No)" to "Select Yes/No"	IRB Approved? Definition: Indicate if the protocol has obtained IRB approval. Select one (Yes/No).
medicare_org	NONE	Old Item: Medicare: Organization is Deemed?	Old Item: Medicare: Organization is Deemed?																																								["Medicare: Organization is Deemed?" item deleted]	deleted entire item	Medicare: Organization is Deemed? Definition: Trials funded by NIH, CDC, AHRQ, HCFA, DOD and VA, trials conducted at NCI cancer centers, and all trials of patients that are either conducted under an Investigational New Drug Application (IND) or are exempt from having an IND under 21 CFR 312.2(b)(1) are considered Medicare deemed. See Medicare Coverage Policy ~ Clinical Trials: Final National Cove…	changed "investigational drug applications" to "investigational drug application" inserted "are considered Medicare deemed"	Medicare: Organization is Deemed? Definition: Trials funded by NIH, CDC, AHRQ, HCFA, DOD and VA, trials conducted at NCI cancer centers and all trials of patients that are either conducted under an investigational new drug applications (IND) or are exempt from having an IND under 21 CFR 312.2(b)(1). See Medicare Coverage Policy ~ Clinical Trials: Final National Coverage Decision.
medicare_req	NONE	Old Item: Medicare: Study Meets Requirements?	Old Item: Medicare: Study Meets Requirements?																																								[Item deleted]	["Medicare: Study Meets Requirements?" item deleted]	Medicare: Study Meets Requirements? Definition: The subject of the trial must evaluate an item or service that falls within a Medicare benefit category and is not statutorily excluded from coverage. See Medicare Coverage Policy ~ Clinical Trials: Final National Coverage Decision.
accepts_patients	NONE	Old Item: Accepts Patients?	Old Item: Accepts Patients?																																						[Item deleted]	deleted entire item: "Accepts Patients? Definition: Indicate if persons who have or had the condition(s) being studied or otherwise specified in the eligibility requirements (e.g., specific symptoms), may participate in the study. Select Yes/No."					Accepts Patients? Definition: Indicate if persons who have or had the condition(s) being studied or otherwise specified in the eligibility requirements (e.g., specific symptoms), may participate in the study. Select one (Yes/No).	changed "patients are sought for the protocol" to "persons who have or had the condition(s) being studied or otherwise specified in the eligibility requirements (e.g., specific symptoms), may participate in the study."	Accepts Patients? Definition: Indicate if patients are sought for the protocol. Select one (Yes/No).
last_followup_date	NONE	Old Item: Last Follow-up Date	Old Item: Last Follow-up Date												[Item deleted]	Deleted item: Last Follow-Up Date Definition: Date that the final subject was (or is expected to be) examined or treated. A "Type" menu is also included, with options Anticipated and Actual. For active studies, set Type to Anticipated and specify the expected last follow-up date, updating the date as needed over the course of the study. Upon study completion, change Type to Actual and update the …					Date that last subject was examined or treated. A "Type" menu is also included, with options Anticipated and Actual. For active studies, set Type to Anticipated and specify the expected last follow-up date, updating the date as needed over the course of the study. Upon study completion, change Type to Actual and update the date if necessary.	changed "Date that follow-up with all study participants is complete." to "Date that last subject was examined or treated. A "Type" menu is also included, with options Anticipated and Actual. For active studies, set Type to Anticipated and specify the expected last follow-up date, updating the date as needed over the course of the study. Upon study completion, change Type to Actual and update the…													Last Follow-Up Date Definition: Date that follow-up with all study participants is complete.	inserted new item "Last Follow-Up Date Definition: Date that follow-up with all study participants is complete." NOTE: Moved the contents of Last Follow-Up Date to Study Completion Date as it is called as of 2010-05 release.
last_followup_date_type	NONE	Old Item: Last Follow Up Date Type	Old Item: Last Follow-up Date Type												[Item deleted]	Deleted item: Last Follow-Up Date Definition: Date that the final subject was (or is expected to be) examined or treated. A "Type" menu is also included, with options Anticipated and Actual. For active studies, set Type to Anticipated and specify the expected last follow-up date, updating the date as needed over the course of the study. Upon study completion, change Type to Actual and update the …					Date that last subject was examined or treated. A "Type" menu is also included, with options Anticipated and Actual. For active studies, set Type to Anticipated and specify the expected last follow-up date, updating the date as needed over the course of the study. Upon study completion, change Type to Actual and update the date if necessary.	changed "Date that follow-up with all study participants is complete." to "Date that last subject was examined or treated. A "Type" menu is also included, with options Anticipated and Actual. For active studies, set Type to Anticipated and specify the expected last follow-up date, updating the date as needed over the course of the study. Upon study completion, change Type to Actual and update the…
data_entry_closure_date	NONE	Old Item: Data Entry Closure Date	Old Item: Data Entry Closure Date																		[Item deleted]	deleted item: "Data Entry Closure Date Definition: Date that data submission for the study is complete."													Data Entry Closure Date Definition: Date that data submission for the study is complete.	inserted new item under 5. Status between Study Start Date and Study Completion Date
end_date	NONE	Old Item: End Date	Old Item: End Date
delayed_posting	NONE	Non-public item: Delayed Posting?	Delayed Posting? (FDAAA) Definition: If this is a Section 801 applicable clinical trial, indicate whether this trial includes a device NOT previously approved or cleared by the US FDA for any use, as specified in US Public Law 110-85, Title VIII, Section 801. Select Yes/No. If "Yes" is selected, full posting of the trial information on ClinicalTrials.gov will be delayed until after the device has…						Delayed Posting? (FDAAA) Definition: If this is a Section 801 applicable clinical trial, indicate whether this trial includes a device NOT previously approved or cleared by the US FDA for any use, as specified in US Public Law 110-85, Title VIII, Section 801. Select Yes/No. If "Yes" is selected, full posting of the trial information on ClinicalTrials.gov will be delayed until after the device has…	inserted "(FDAAA)"	Delayed Posting? Definition: If this is a Section 801 applicable clinical trial, indicate whether this trial includes a device NOT previously approved or cleared by the US FDA for any use, as specified in US Public Law 110-85, Title VIII, Section 801. Select Yes/No. If "Yes" is selected, full posting of the trial information on ClinicalTrials.gov will be delayed until after the device has been ap…	inserted new item "Delayed Posting? Definition: If this is a Section 801 applicable clinical trial, indicate whether this trial includes a device NOT previously approved or cleared by the US FDA for any use, as specified in US Public Law 110-85, Title VIII, Section 801. Select Yes/No. If "Yes" is selected, full posting of the trial information on ClinicalTrials.gov will be delayed until after the…
ind_information	NONE	Non-public item: IND/IDE Information	Investigational New Drug Application (IND)/Investigational Device Exemption (IDE) Information: Complete the following only if the protocol involves an Investigational New Drug Application (IND) or Investigational Device Exemption (IDE) under US Food and Drug Administration regulations.								Investigational New Drug Application (IND)/Investigational Device Exemption (IDE) Information: Complete the following only if the protocol involves an Investigational New Drug Application (IND) or Investigational Device Exemption (IDE) under US Food and Drug Administration regulations.	deleted "(Will not be made public - for administrative purposes only.)"																					Investigational New Drug Application (IND)/Investigational Device Exemption (IDE) Informationn: Complete the following only if the protocol involves an Investigational New Drug Application (IND) or Investigational Device Exemption (IDE) under US Food and Drug Administration regulations. (Will not be made public - for administrative purposes only.)	changed 'IND Application Info to IND Application/IDE Info' inserted ") or Investigational Device Exemption (IDE) under US Food and Drug Administration regulations"											Investigational New Drug Application (IND) Information: Complete the following only if the protocol involves an Investigational New Drug Application (IND). (Will not be made public - for administrative purposes only.)	inserted "Application" - twice changed "published" to "made public"	Investigational New Drug (IND) Information: Complete the following only if the protocol involves an investigational new drug (IND) application. (Will not be published - for administrative purposes only.)
ind_protocol	NONE	Non-public item: IND/IDE Protocol?	IND/IDE Protocol? * (FDAAA) Definition: Indicate if the protocol involves an Investigational New Drug Application (IND) or Investigational Device Exemption (IDE) under US Food and Drug Administration regulations (Will not be made public - for administrative purposes only.)						IND/IDE Protocol? * (FDAAA) Definition: Indicate if the protocol involves an Investigational New Drug Application (IND) or Investigational Device Exemption (IDE) under US Food and Drug Administration regulations (Will not be made public - for administrative purposes only.)	inserted "* (FDAAA)"	IND/IDE Protocol? Definition: Indicate if the protocol involves an Investigational New Drug Application (IND) or Investigational Device Exemption (IDE) under US Food and Drug Administration regulations (Will not be made public - for administrative purposes only.)	deleted " * "																	IND/IDE Protocol? * Definition: Indicate if the protocol involves an Investigational New Drug Application (IND) or Investigational Device Exemption (IDE) under US Food and Drug Administration regulations(Will not be made public - for administrative purposes only.)	inserted " * "			IND/IDE Protocol? Definition: Indicate if the protocol involves an Investigational New Drug Application (IND) or Investigational Device Exemption (IDE) under US Food and Drug Administration regulations(Will not be made public - for administrative purposes only.)	changed "IND" to "IND/IDE" changed "is being conducted under" to "involves" changed "If not, select 'No' and continue" to "or Investigational Device Exemption (IDE) under US Food and Drug Administration regulations"	IND Protocol? Definition: Indicate if the protocol is being conducted under an Investigational New Drug Application (IND). If not, select "No" and continue. (Will not be made public - for administrative purposes only.)	deleted "Submission: Required"					IND Protocol? Submission: Required Definition: Indicate if the protocol is being conducted under an Investigational New Drug Application (IND). If not, select "No" and continue. (Will not be made public - for administrative purposes only.)	inserted "Submission: Required"			IND Protocol? Definition: Indicate if the protocol is being conducted under an Investigational New Drug Application (IND). If not, select "No" and continue. (Will not be made public - for administrative purposes only.)	changed "involves" to "is being conducted under" changed "published" to "made public"	IND Protocol? Definition: Indicate if the protocol involves an investigational new drug (IND) application. If not, select "No" and continue. (Will not be published - for administrative purposes only.)	deleted "Application" inserted "Protocol"	IND Application? Definition: Indicate if the protocol involves an investigational new drug (IND) application. If not, select "No" and continue. (Will not be published - for administrative purposes only.)
[truncated: 8 more rows]
